# Supplementary material for: The importance of spawning behavior in understanding the vulnerability of exploited marine fishes in the U.S. Gulf of Mexico
Source: PeerJ. 2021 Jul 27;9:e11814. doi: 10.7717/peerj.11814 (PMC8323598; doi:10.7717/peerj.11814)
Supplement: Supplemental Information 3 [file peerj-09-11814-s003.xlsx]

## Sheet: Citation
Suggested citation
Biggs, C., B. Erisman, W. Heyman, S.Kobara, N. Farmer, S. Lowerre-Barbieri, M. Karnauskas, and J. Brenner. (2018). Cooperative monitoring program for spawning aggregations in the Gulf of Mexico: Spawning Seasons. Version 2018.07. Available at http://gcoos3.tamu.edu/restore/

## Sheet: Metadata
Parameter Type	Parameter	Description
General Info	FMP Category	Fisheries Management Plan management unit
General Info	Common Name	American Fisheries Society Common Name
General Info	Family	Family
General Info	Scientific Name	Genus and Species names
Spawning Behavior	Aggregation Type	The type of spawning aggregation: Does Not Aggregate; Unknown; Simple Migratory Spawner; Resident Spawning Aggregation; Transient Spawning Aggregation.
Spawning Behavior	Spawning Season Months	Months of spawning, with peak months in bold. (J, F, M, A, Ma, Ju, Jl, Au, S, O, N, D)
Spawning Behavior	Relative Abundance (1-6)	Change in abundance of fish relative to non-reproductive periods. No change in abundance between spawning and non-spawning periods = 1; abundance doubles from solitary to few to ca. 10 fish (clustering of polygynous groups) = 2; abundance increases from small groups to 100-200 fish = 3; abundance increases from small groups to 500-1000 fish = 4; abundance increases from small groups to 1,000-10,0…
Life History	Max Age (years)	Maximum age in years (longevity)
Life History	Max Weight (kg)	Maximum weight in kilograms
Life History	Max Length (cm)	Maximum reported length for the species in centimeters
Life History	K (vB Growth Coefficient)	von Bertalanffy growth coefficient
Life History	Linf (Asymptotic Length, cm)	Asymptotic length for von Bertalanffy growth equation, expressed in centimeters
Life History	to (time at length zero, years)	Time at length zero for von Bertalanffy growth equation, expressed in years
Life History	Age at Maturity (months)	Age at 50% maturity in months
Life History	Length at Maturity (cm)	Length at 50% maturity in centimeters
Life History	M (Natural Mortality)	Death rate per year not associated with fishing
Please refer to the "Methods" section of the website for more information on life history and spawning behavior

## Sheet: LH and Behavior Info
General Information				Spawning Behavior			Life History
FMP Category	Common Name	Family	Scientific Name	Aggregation Type	Spawning Season Months GOM	Relative Abundance (1-6)	Max Age (years)	Max Weight (kg)	Max Length (cm)	K vB Growth Coeff.	Linf Asympt. Length (cm)	t0 Age at Length 0 (years)	Age at Maturity (months)	Length at Maturity (cm)	M Natural Mortality
Reef Fish	Almaco Jack	Carangidae	Seriola rivoliana	Mixed	AMaJuJlAuSON	3	22	60	160	0.13	163	0.83	53	81	NA
Not Federally Managed	Black Drum	Sciaenidae	Pogonias cromis	Mixed	JFMA AuSO	4	58	51	150	0.167	113.6	-0.129	60	65	0.063
Reef Fish	Black Grouper	Epinephelidae	Mycteroperca bonaci	Transient	DJFMA	4	33	163	150	0.1432	133.4	-0.9028	78	85.6	0.136
Reef Fish	Cubera Snapper	Lutjanidae	Lutjanus cyanopterus	Transient	JuJlAuS	6	22	57	160	0.16	120	-0.3	24	61.5	0.15
Reef Fish	Gag	Epinephelidae	Mycteroperca microlepis	Transient	JFMA	3	31	37	145	0.1342	127.795	-0.06687	42	54.3	0.1342
Reef Fish	Atlantic Goliath Grouper	Epinephelidae	Epinephelus itajara	Transient	JuJlAuSO	3	37	363	250	0.0937	222.1	-0.6842	72	120	0.12
Reef Fish	Gray Triggerfish	Balistidae	Balistes capriscus	Resident	MaJuJlAu	4	15	6	30	0.14	58.97	-1.66	18	16.9	0.27
Reef Fish	Greater Amberjack	Carangidae	Seriola dumerili	Mixed	MAMaJu	3	15	81	190	0.144798	143.6	-0.954	27	78.8	0.25
Reef Fish	Hogfish	Labridae	Lachnolaimus maximus	Resident	NDJFMAMaJu	2	23	10	91	0.1057	84.89	-1.329	11	15.2	0.179
Coastal Migratory Pelagics	King Mackerel	Scombridae	Scomberomorus cavalla	Simple Migratory	MaJuJlAuSO	2	24	42.3	184	0.1879	115.41	-2.5955	48	60	0.174
Reef Fish	Mutton Snapper	Lutjanidae	Lutjanus analis	Transient	MaJuJlAu	5	40	15.6	94	0.165	86.1	-1.32	48	49.9	0.11
Reef Fish	Nassau Grouper	Epinephelidae	Epinephelus striatus	Transient	DJF	6	29	27	100	0.13	76	-1.12	60	40	0.18
Red Drum	Red Drum	Sciaenidae	Sciaenops ocellatus	Mixed	AuSON	4	42	45	160	0.32	88.1	-1.29	48	68	0.16
Reef Fish	Red Grouper	Epinephelidae	Epinephelus morio	Does Not Aggregate	FMAMaJu	2	29	23	125	0.1251	82.9	-1.2022	34	29.2	0.14
Reef Fish	Red Snapper	Lutjanidae	Lutjanus campechanus	Resident	MaJuJlAuS	2	48	23	100	0.191852	85.6374	-0.394525	24	23	0.1
Reef Fish	Scamp	Epinephelidae	Mycteroperca phenax	Mixed	JFMAMaJu	3	31	13	107	0.09	77.2	-4.4	24	33.2	0.15
Not Federally Managed	Sheepshead	Sparidae	Archosargus probatocephalus	Transient	FMA	5	20	9.6	92	0.36	46.3	-0.42	24	30	0.15
Reef Fish	Snowy Grouper	Epinephelidae	Hyporthodus niveatus	Does Not Aggregate	JFMAMaJuJlAuSO	1	35	30	122	0.094	106.462	-2.884	60	60	0.19
Not Federally Managed	Southern Flounder	Paralichthyidae	Paralichthys lethostigma	Transient	ONDJ	5	8	9.3	91.5	0.28	65.2	-1.317	24	40	0.362
Coastal Migratory Pelagics	Spanish Mackerel	Scombridae	Scomberomorus maculatus	Simple Migratory	AMaJuJlAuS	2	11	5.9	101	0.61	56	-0.5	8	30.1	0.3
Reef Fish	Speckled Hind	Epinephelidae	Epinephelus drummondhayi	Does Not Aggregate	AMaJuJlAuS	1	45	30	110	0.12	88.8	-1.8	79	53.2	0.15
Not Federally Managed	Spotted Seatrout	Sciaenidae	Cynoscion nebulosus	Resident	AMaJuJlAuS	3	12	7.9	70	0.32	68.7	-0.26	12	23	0.3
Reef Fish	Tilefish	Malacanthidae	Lopholatilus chamaeleonticeps	Does Not Aggregate	JFMAMaJu	2	40	26	125	0.13	83	-2.14	24	34.4	0.13
Reef Fish	Vermilion Snapper	Lutjanidae	Rhomboplites aurorubens	Resident	AMaJuJlAuS	2	26	3	63	0.3254	34.4	-0.7953	24	13.8	0.25
Reef Fish	Warsaw Grouper	Epinephelidae	Hyporthodus nigritus	Mixed	AMaJunJlAuSON	3	41	198	235	0.05	239.4	-3.62	49	81	NA
Reef Fish	Yellowedge Grouper	Epinephelidae	Hyporthodus flavolimbatus	Mixed	FMAMaJuJlAuSON	3	85	20	115	0.059	100.45	-4.576	96	54.7	0.073
Reef Fish	Yellowfin Grouper	Epinephelidae	Mycteroperca venenosa	Transient	JFMAMaJuJlAu	4	15	19	100	0.12	89	0.75	44	54	0.26
Reef Fish	Yellowmouth Grouper	Epinephelidae	Mycteroperca interstitialis	Transient	JFMAMaJuJlAuSOND	3	28	9	84	0.08	82.8	-7.5	36	42.5	0.231

## Sheet: References
Index #	Citation - see reference database on website
2	Brule et al. (2003)
3	Koenig & Coleman (1998)
4	Koenig et al. (1996)
5	Coleman et al. (1996)
6	Sedar 33 Gag (2014)
7	Sedar 10 (2006)
9	Burgos et al. (2007)
10	Brule et al. (1999)
11	Goodyear & Schirripa (1993)
12	Sedar 42 (2015)
13	Murphy & Taylor (1990)
14	Lowere-Barbieri et al. (2008)
15	Johnson & Funicelli (1991)
16	Sedar 44 (2015)
17	Mercer (1984)
18	Jackson et al. (2006)
19	Collins et al. (1996)
20	Sedar 31 (2013)
21	Grimes & Huntsman (1980)
22	Sedar 17 (2008)
23	Sedberry et al. (2006)
24	Harris et al. (2007)
25	Sedar 33 GAJ (2014)
26	Sedar 19 (2010)
27	Domeier & Colin (1997)
28	Brule et al. (2003b)
29	Paz & Sedberry (2008)
30	Briggs (1958)
31	Kelly (2014)
32	Burton et al. (2015)
33	Simmons & Szedlmayer (2012)
34	Muñoz et al. (2010)
35	Colin (1982)
36	SEDAR 37 (2013)
37	Colin (1992)
38	Bolden (2000)
39	Sadovy & Eklund (1999)
41	Bullock & Godcharles (1996)
42	Smith (1971)
43	Wyanski (2000)
44	Cowan (2012)
45	Sedar 13 (2001)
46	Cuellar & Sedberry (1996)
47	Biggs & Nemeth (2016)
48	Heyman et al. (2005)
49	Claro & Lindeman (2003)
50	Harris et al. (2002)
51	Heemstra & Randall (1993)
53	Brule & Colas (2000)
54	Gilmore & Jones (1992)
55	Dooley (1978)
56	Lombardi-Carlson et al. (2012)
57	Erickson et al. (1985)
58	Grimes et al. (1988)
59	Schärer et al. (2012)
60	Sedar 14 (2007)
61	García-Cagide et al. (1994)
62	Tuz-Sulub et al. (2006)
63	Sluka & Chiappone (1998)
64	Bullock & Murphy (1994)
65	Burton et al. (2014)
66	Bullock et al. (1992)
67	Burton (2002)
68	Collins & Stender (1987)
69	De Vries et al. (1990)
70	Collette et al. (1978)
71	Godcharles & Murphy (1986)
72	Finucane et al. (1986)
73	Coleman & Scanlon (2011)
74	Burton et al. (2005)
75	Munro et al. (1973)
76	Berry & Burch (1979)
77	Fontes et al. (2014)
78	Luckhurst & Ward (1996)
79	Stephen & Harris (2010)
80	SAFMC (2005)
81	Hood & Schlieder (1992)
82	Coleman et al. (2010)
83	McErlean & Smith (1964)
84	Nelson et al. (2011)
85	Collins et al. (2002)
86	McGovern et al. (2005)
87	Sedar 12 (2006)
88	Moe (1969)
89	Fitzhugh et al. (2006)
90	McGovern et al. (2002)
91	Beckman et al. (1989)
92	Wilson & Nieland (1994)
93	Conn et al. (2007)
94	Kulaw (2012)
95	Porch et al. (2015)
96	Lowerre-Barbieri et al. (2015)
97	Nelson (1988)
98	Hood & Johnson (1999)
99	Fitzhugh et al. (2015)
100	Porch & Cass-Calay (2001)
101	SEDAR 9 (2005)
102	SEDAR 15 (2008)
103	Cummings & McClellan (1997)
104	Beasley (1993)
105	Murie & Parkyn (2013)
106	Crabtree & Bullock (1998)
107	Eklund et al. (2000)
108	Sala et al. (2001)
109	SEDAR 41 (2013)
110	MacKichan & Szedlmayer (2007)
111	Ingram (2001)
112	SEDAR 43 (2015)
113	Mcbride et al. (2008)
114	Cooper et al. (2013)
115	Heyman & Kjerfve (2008)
116	Mcbride & Johnson (2007)
117	NMFS (2008)
118	Cook (2007)
119	SEDAR 22 (2011a)
120	SEDAR 4 (2004)
121	SEDAR 36 (2014)
122	Moore & Labisky (1984)
123	Manooch III et al. (1998)
124	Ziskin (2008)
125	Bullock & Smith (1991)
126	Lombardi et al. (2010)
127	Lombardi (2012)
128	SEDAR 22 (2011b)
129	Tuz-Sulub et al. (2004)
130	SEDAR 6 (2004)
131	Aguilar-Perera et al. (2009)
132	Colin (1990)
133	Koenig et al. (2011)
134	Lara et al. (2009)
135	SEDAR 23 (2011)
136	Koenig & Coleman (2009)
137	SEDAR 15A (2008)
138	Domeier et al. (1996)
139	O'hop et al. (2015)
140	Manooch III & Mason (1987)
141	Schmidt et al. (1993)
142	Sedar 17 (2008)
143	SEDAR 28 (2013)
144	Arreguín-sánchez et al. (1995)
145	Beaumariage (1973)
146	SEDAR 38 (2014)
147	Devries & Grimes (1997)
148	Fable Jr. et al. (1987)
149	Fitzhugh et al. (2008)
150	Grimes et al. (1990)
151	Roumillat et al. (1995)
152	Holt (2008)
153	Aguilar-Perera & Aguilar-Dávila (1996)
154	McClellan & Cummings (1997)
155	Grimes et al. (1986)
156	Fitzhugh et al. (2005)
157	Burch (1979)
158	Lowerre-Barbieri et al. (2013)
159	Brown-Peterson et al. (1988)
160	Brown-Peterson et al. (2002)
161	Lorio & Perret (1978)
162	Collins et al. (2001)
163	Maceina et al. (1987)
164	Taylor et al. (2011)
165	Nieland et al. (2002)
166	Render & Wilson (1992)
167	Beckman et al. (1991)
168	Dutka-Gianelli & Murie (2001)
169	Munyandorero et al. (2006)
170	Stunz et al. (2000)
171	Kaiser et al. (2012)
172	Froeschke et al. (2011)
173	Wenner et al. (1990)
174	Fischer & Thompson (2004)
175	Stokes (1977)
176	Safrit & Schwartz (1998)
177	Murphy & Taylor (1989)
178	Nieland & Wilson (1993)
179	Cornelius (1984)
180	Smith et al. (2009)
181	Jones & Wells (1998)
182	ASMFC (2015)
184	Osburn & Matlock (1984)
185	Saucier & Baltz (1993)
186	Peters &n McMichael (1990)
187	Fontenot & Rogillio (1970)
188	Cody et al. (1985)
189	Simmons & Breuer (1962)
190	Locascio & Mann (2008)
191	Locascio & Mann (2011)
192	Beckman et al. (1990)
193	Richards (1973)
194	Matlock (1992)
195	Shepard (1986)
196	Henderson-Arzapalo et al. (1988)
198	Overstreet (1983)
199	Collins et al. (1987)
200	Collins et al. (1998)
201	SEDAR Update(2009)
202	Manooch & Haimovici (1978)
203	Smith (1972)
204	Aguilar-Perera (1994)
205	Colin et al. (1987)
206	Burnett-Herkes (1975)
207	Claro et al. (1990)
208	Tucker et al. (1987)
209	Wilson et al. (1988)
210	Vanderkooy (2006)
211	Springer & Woodburn (1960)
212	Jennings (1985)
213	Murphy et al. (1997)
214	Colura et al. (1988)
215	McMichael and Peters (1989)
216	Weiting et al. (1989)
217	Coto & Argudin (1991)
218	Brown-Peterson Peterson & Warren (2001)
220	DeVries et al. (2003)
222	Colura et al. (1984)
223	Colura et al. (1994)
224	Murphy & Taylor (1994)
225	Warren (1995)
226	Devries (1997)
227	Bedee et al. (2003)
228	Lowerre-Barbieri et al. (2009)
229	Walters et al. (2009)
230	Gilmore (2003)
231	Mok & Gilmore (1983)
232	Baltz et al. (2003)
233	Helser et al. (1993)
234	Holt & Holt (2003)
235	Brown-Peterson (2003)
236	Pearson (1928)
237	Tabb (1966)
238	Moody (1950)
239	Klima & Tabb (1959)
240	Moffett (1961)
241	Sundararaj & Suttkus (1962)
242	Hein & Shepard (1979)
243	Bumguardner et al. (1998)
244	Locascio et al. (2012)
245	Ross et al. (1983)
246	Campbell-Hostetler (1982)
249	Doerzbacher et al. (1988)
250	Corey (2016 )
251	Etzold & Christmas (1979)
252	Blanchet et al. (2010)
253	Frick (1988)
254	Brown-Peterson (2005 ASIH poster)
255	Music & Pafford (1984)
256	Wenner (1996)
257	Murphy and McDonald (2000)
258	McDonough et al. (2011)
259	Swingle (1977)
260	McEachron (1980)
261	Berrien (1977)
263	Hoese (1965)
265	SEDAR 9 (2006)
266	Holt (2002)
267	Lowerre-Barbieri et al. (2016)
268	Winner et al. (2014)
269	Murphy & Crabtree (2001)
270	Patterson et al. (2004)
271	Matlock (1987)
272	Goodyear (1989)
273	Perret (1980)
274	Porch et al. (2002)
275	Reagan (1985)
276	Lowerre-Barbieri (2015 SEDAR)
277	Luzcovich (1999)
278	Lindeman et al. (2000)
279	Kadison et al. (2006)
280	Martinez-Andrade (2003)
281	Ault & Luo (1998)
282	Guest (1978)
283	Mann et al. (2009)
284	Powell (1975)
285	Davis (1990)
286	Holt et al. (1985)
287	Ziskin et al. (2011)
288	Andrews et al. (2013)
289	Farmer et al. (2016)
290	Lombardi et al. (2013)
291	Fitzhugh et al. (2006b)
292	Heppel & Sullivan (2000)
293	Johnson et al. (1993)
294	Chargis & Mahmoudi (2013)
295	Lombardi-Carlson et al. (2006)
296	Lowerre-Barbieri et al. (2014)
297	Lombardi-Carlson et al. (2002)
298	Giminez-Hurtado et al. (2009)
299	Lombardi Carlson et al. (2008)
300	Cass-Calay et al. (2015)
301	Sedar 24 (2010)
302	Allman et al. (2002)
303	Bradley & Bryan (1975)
304	Brule et al. (2010)
305	Fischer et al. (2004)
306	Baker & Wilson (2001)
307	Szedlmayer & Shipp (1994)
308	Wilson & Nieland (2001)
309	Render (1995)
310	Patterson (1999)
311	Gallaway et al. (2009)
312	Goodyear (1995)
313	Patterson et al. (2001)
314	Saari et al. (2014)
315	Sedar 7 (2005)
316	Sedar 7 update (2009)
317	Szedlmayer et al. (2005)
318	Woods et al. (2003)
319	Sedar 45 (2016)
320	Allman (2007)
321	Barber (1989)
322	Nelson & Manooch (1982)
323	Schirripa (1992)
324	Johnson et al. (2010)
325	Lombard et al. (2015)
326	Allman et al. (2004) Sedar 9 DW2
327	Murie & Parkyn (2008)
328	Thompson et al. (1999)
329	Manooch & Potts (1997)
330	Schirripa (1997)
331	Brown et al. (2005)
332	Cummings & McClellan (2000)
333	O'Hop & Beaver (2009)
334	Fitzhugh et al. (2015b)
335	Hood & Johnson (1997)
336	Johnson & Saloman (1984)
337	Sedar 9 (2006c)
338	McBride & Murphy (2003)
339	Collins & McBride (2008)
340	McBride (2001)
341	Claro et al. (1989)
342	Davis (1976)
343	McBride & Richardson (2007)
344	Collins & McBride (2011)
345	Sedar 6 (2004b)
346	Ault et al. (1998)
347	Olsen & LaPlace 1979
348	Tucker et al. (1993)
349	Sadovy & Colin (1995)
350	Thompson & Munro (1976)
351	Bush et al. (1996)
352	Bullock et al. (1996)
353	Cook & Hendon (2010)
354	Comyms et al. (2006)
355	Cook et al. (2009)
356	Sedar 49 (2016)
357	Matheson & Huntsman (1984)
358	Moore & Labisky (1984)
359	Wyanski et al. (2013)
360	Matheson et al. (1986)
361	Stephen et al. (2011)
362	McBride et al. (2013)
363	Harris & Grossman (1985)
364	Erickson & Grossman (1985)
365	Turner er al. 1983
366	Palmer et al. (2006)
367	Appledoorn et al. (1987)
368	Thompson & Munro (1978)
369	Manickchand-Heileman & Phillip (2000)
370	Murie et al. (2009)
371	Collins (2008)
372	Sedar 47 (2016)
373	Faunce et al. (2007)
374	Mason & Manooch (1985)
375	Claro (1981)
376	Powers et al. (2012)
377	Wilson & Nieland (2000)
378	Latour et al. (2001)
379	Cooksey (1996)
380	Fable et al. (1987)
381	Medina Quej & Dominguez Viveros (1997)
382	Manooch et al. (1987)
383	Johnson et al. (1983)
384	Shepard et al. (2010)
385	Sutter et al. (1991)
386	Sedar 16 (2009)
387	Sedar 5 (2004)
388	Rutherford (1982)
389	Guest & Gunter (1958)
390	Roumillat & Brouwer (2004)
391	Robertson and van Tassel (2015)
392	Dooley (1972)
393	Fahay (1975)
394	Heyman (2001)
395	Koenig et al. (2016)
396	Thompson et al. (1992)
397	Kowal (2010)

## Sheet: References_full
Common_name	Species	References
Almaco Jack	Seriola rivoliana	Berry, F. H., & Burch, R. K. (1979). Aspects of the Amberjack Fisheries. Proceedings of the 31st Gulf and Caribbean Fisheries Institute, 179–194. Retrieved from http://aquaticcommons.org/12307/1/gcfi_31-23.pdf
Almaco Jack	Seriola rivoliana	Devries, D. A., Gardner, C. L., Raley, P., & Overly, K. (2016). Almaco jack Seriola rivoliana Findings from the NMFS Panama City Laboratory Trap & Camera Fishery-Independent Survey 2004-2014. SEDAR 49-DW-15. SEDAR, North Charleston, SC. Retrieved from http://sedarweb.org/docs/wpapers/S49_DW_15_PClab_almaco jack_0.pdf
Almaco Jack	Seriola rivoliana	Dooley JK (1972) Fishes associated with the pelagic sargassum complex, with a discussion of the sargassum community. Contrib Mar Sci 16:1–32
Almaco Jack	Seriola rivoliana	Fahay M (1975) An annotated list of larval and juvenile fishes captured with surface-towed meter net in the South Atlantic Bight during four RV Dolphin cruises between May 1967 and February 1968. NOAA Technical Report NMFS SSRF-6856. Seattle WA. 1-48.
Almaco Jack	Seriola rivoliana	Farmer, N. A., Malinowski, R. P., McGovern, M. F., & Rubec, P. J. (2016). Stock complexes for fisheries management in the Gulf of Mexico. Marine and Coastal Fisheries, 8(1), 177–201. http://doi.org/10.1080/19425120.2015.1024359
Almaco Jack	Seriola rivoliana	Fontes, J., Schmiing, M., & Afonso, P. (2014). Permanent aggregations of a pelagic predator at shallow seamounts. Marine Biology, 161(6), 1349–1360. http://doi.org/10.1007/s00227-014-2423-9
Almaco Jack	Seriola rivoliana	Heyman WD (2001) Spawning aggregations in Belize: towards a sustainable management of Nassau Groupers in Belize. The Nature Conservancy. 1-5
Almaco Jack	Seriola rivoliana	Luckhurst, B., & Ward, J. (1996). Analysis of trends in Bermuda’s fishery statistical database from 1975 to 1990 with reference to fishery management measures implemented during this period. Proceedings of the 44th Gulf and Caribbean Fisheries Institute. Retrieved from http://aquaticcommons.org/12687/1/gcfi_44-19.pdf
Almaco Jack	Seriola rivoliana	Munro, J. L., Gaut, V. C., Thompson, R., & Reeson, P. H. (1973). The spawning seasons of Caribbean reef fishes. Journal of Fish Biology, 5(1), 69. http://doi.org/10.1111/j.1095-8649.1973.tb04431.x
Almaco Jack	Seriola rivoliana	Noaa. (2005). Stock Assessment and Fishery Evaluation Report for the Snapper Grouper Fishery of the South Atlantic November 18, 2005. South Atlantic Fishery Management Council. Retrieved from http://sero.nmfs.noaa.gov/sustainable_fisheries/safe_reports/documents/pdfs/snapper_grouper_2005_safe.pdf
Almaco Jack	Seriola rivoliana	Sedar. (2016). Sedar 49 Gulf of Mexico Data-limited Species : red drum, lane snapper, wenchman, yellowmouth grouper, speckled hind, snowy grouper, almaco jack, lesser amberjack. North Charleston, SC.
Almaco Jack	Seriola rivoliana	Stephen, J. A., & Harris, P. J. (2010). Commercial catch composition with discard and immediate release mortality proportions off the southeastern coast of the United States. Fisheries Research, 103(1–3), 18–24. http://doi.org/10.1016/j.fishres.2010.01.007
Black Drum	Pogonias cromis	Beckman, D. W., Stanley, A. L., Render, J. H., & Wilson, C. A. (1990). Age and Growth of Black Drum in Louisiana Waters of the Gulf of Mexico. Transactions of the American Fisheries Society, 119(3), 537–544. http://doi.org/10.1577/1548-8659(1990)119<0537:AAGOBD>2.3.CO;2
Black Drum	Pogonias cromis	Campbell-Hostettler, P. (1982). Characteristics of the spring black drum sport fishery in three selected Texas bays. Texas Parks and Wildlife Department, Coastal Fisheries. Retrieved from https://repositories.tdl.org/tamug-ir/handle/1969.3/20444
Black Drum	Pogonias cromis	Cody, T. J., Rice, K. W., & Bryan, C. E. (1985). Distribution and Gonadal Development of Black Drum in Texas Gulf Waters. Management Data Series, 72, 21. Retrieved from https://tpwd.texas.gov/publications/pwdpubs/media/mds_coastal/Series 1_MDS72.pdf
Black Drum	Pogonias cromis	Collins, M. R., Callahan, B. M., & Post, W. C. (2001). Spawning aggregations of recreationally important Sciaenid species in the Savannah Harbor: spotted seatrout Cynoscion nebulosus, red drum Sciaenops ocellatus, weakfish Cynoscion regalis, and black drum Pogonias cromis. South Carolina Department of Natural Resources, Charleston, South Carolina. Retrieved from https://www.researchgate.net/publi…
Black Drum	Pogonias cromis	Cornelius, S. (1984). Contribution to the life history of black drum and analysis of the commercial fishery of Baffin Bay. Texas A & M University. Retrieved from http://repositories.tdl.org/tamug-ir/handle/1969.3/24655
Black Drum	Pogonias cromis	Cowan, J. H. J., & Shaw, R. F. (1988). Distribution, abundance, and transport of larval sciaenids collected during winter and early spring from the continental shelf waters off west Louisiana. Fish. Bull.; (United States), 86:1. Retrieved from http://fishbull.noaa.gov/861/cowan.pdf
Black Drum	Pogonias cromis	Doerzbacher, J. F., Green, A. W., Matlock, G. C., & Osburn, H. R. (1988). A temperature compensated von bertalanffy growth model for tagged red drum and black drum in Texas bays. Fisheries Research, 6(2), 135–152. http://doi.org/10.1016/0165-7836(88)90033-1
Black Drum	Pogonias cromis	Fitzhugh, G. R., Shertzer, K. W., Todd Kellison, G., & Wyanski, D. M. (2012). Review of size- and age-dependence in batch spawning: Implications for stock assessment of fish species exhibiting indeterminate fecundity. Fishery Bulletin, 110(4), 413–425. Retrieved from http://hdl.handle.net/10827/10563
Black Drum	Pogonias cromis	Fitzhugh, G. R., Thompson, B. A., & Snider, T. G. (1993). Ovarian development, fecundity, and spawning frequency of black drum Pogonias cromis in Louisiana. Fishery Bulletin, 91(2), 244–253.
Black Drum	Pogonias cromis	Fontenot, B. J., & Rogillo, H. E. (1970). A study of estuarine sportfishes in the Biloxi marsh complex, Louisiana. Louisian Wildlife and Fisheries Commission. Baton Rouge, LA. http://doi.org/10.1017/CBO9781107415324.004
Black Drum	Pogonias cromis	Holt, G. J., Holt, S. A., & Arnold, C. R. (1985). Diel periodicity of spawning in sciaenids. Marine Ecology Progress Series, 27, 1–7. http://doi.org/10.3354/meps027001
Black Drum	Pogonias cromis	Jones, C. M., & Wells, B. (1998). Age, growth and mortality of black drum, Pogonias cromis , in the Chesapeake Bay region, 96, 451–461. Retrieved from http://digitalcommons.odu.edu/cgi/viewcontent.cgi?article=1037%7B%7B%7D%7B&%7D%7B%7D%7Dcontext=oeas%7B%7B%7D%7B_%7D%7B%7D%7Dfac%7B%7B%7D%7B_%7D%7B%7D%7Dpubs
Black Drum	Pogonias cromis	Locascio, J. V, & Mann, D. A. (2005). Effects of Hurricane Charley on fish chorusing. Biology Letters, 1(3), 362–365. http://doi.org/10.1098/rsbl.2005.0309
Black Drum	Pogonias cromis	Locascio, J. V, & Mann, D. a. (2008). Diel Periodicity of Fish Sound Production in Charlotte Harbor, Florida. Transactions of the American Fisheries Society, 137(2), 606–615. http://doi.org/10.1577/T06-069.1
Black Drum	Pogonias cromis	Locascio, J. V, & Mann, D. A. (2011). Diel and seasonal timing of sound production by black drum (Pogonias cromis). Fishery Bulletin, 109(3), 327–338. Retrieved from http://fishbull.noaa.gov/1093/locascio.pdf
Black Drum	Pogonias cromis	Locascio, J. V, & Mann, D. A. (2011). Localization and source level estimates of black drum (Pogonias cromis ) calls. Journal of Acoustical Society of America, 130(4), 1868–1879. http://doi.org/10.1121/1.3621514
Black Drum	Pogonias cromis	Locascio, J. V, Burghart, S., & Mann, D. A. (2012). Quantitative and temporal relationships of egg production and sound production by black drum Pogonias cromis. Journal of Fish Biology, 81(4), 1175–1191. http://doi.org/10.1111/j.1095-8649.2012.03376.x
Black Drum	Pogonias cromis	Locascio, J., Peebles, E., & Mann, D. (2008). Sound Production and Spawning by Black Drum (Pogonias cromis) in Southwest Florida. Proceedings of the 60th Gulf and Caribbean Fisheries Institute, (1989), 591–595. http://doi.org/10.1121/1.2932964
Black Drum	Pogonias cromis	Luquet, C.P.Jr., Blanchet, R. H., Lavergne, D. R., Beckman, D. W., Wakeman, J. M., Nieland, D. L. (2001). A biological and fisheries profile of black drum Pogonias cromis in Louisiana. Louisiana Department of Wildlife and Fisheries.
Black Drum	Pogonias cromis	Macchi, G. J., Acha, E. M., & Lasta, C. A. (2002). Reproduction of black drum (Pogonias cromis) in the Rio de la Plata estuary, Argentina. Fisheries Research, 59(1–2), 83–92. http://doi.org/10.1016/S0165-7836(01)00410-6
Black Drum	Pogonias cromis	Murphy, M. D., & Taylor, R. G. (1989). Reproduction and growth of black drum, Pogonias cromis, in northeast Florida. Northeast Gulf Science, 10, 127–137. Retrieved from https://www.researchgate.net/publication/292545786%7B_%7DReproduction%7B_%7Dand%7B_%7Dgrowth%7B_%7Dof%7B_%7Dblack%7B_%7Ddrum%7B_%7DPogonias%7B_%7Dcromis%7B_%7Din%7B_%7Dnortheast%7B_%7DFlorida
Black Drum	Pogonias cromis	Murphy, M. D., Adams, D. H., Tremain, D. M., & Winner, B. L. (1998). Direct validation of ages determined for adult black drum, Pogoinas cromis, in east-central Florida, with notes on black drum migration. Fishery Bulletin, 96, 382–387. Retrieved from http://fishbull.noaa.gov/962/murphy.pdf
Black Drum	Pogonias cromis	Nieland, D. L., & Wilson, C. A. (1993). Reproductive biology and annual variation of reproductive variables of black drum in the northern Gulf of Mexico. Transactions of the American Fisheries Society, 122(3), 318–327. Retrieved from http://www.tandfonline.com/doi/abs/10.1577/1548-8659(1993)122%3C0318%3ARBAAVO%3E2.3.CO%3B2
Black Drum	Pogonias cromis	Osburn, H. R., & Matlock, G. C. (1984). Black drum movement in Texas Bays. North American Journal of Fisheries Management, 4, 523–530. Retrieved from http://www.tandfonline.com/doi/abs/10.1577/1548-8659(1984)4%7B%7B%7D%7B%3C%7D%7B%7D%7D523:BDMITB%7B%7B%7D%7B%3E%7D%7B%7D%7D2.0.CO;2
Black Drum	Pogonias cromis	Peters, K., & Jr, R. M. (1990). Early life history of the black drum Pogonias cromis (Pisces: Sciaenidae) in Tampa Bay, Florida. Northeast Gulf Science. Retrieved from http://www.vliz.be/en/imis?refid=143893
Black Drum	Pogonias cromis	Richards, C. E. (1973). Age, Growth and Distribution of the Black Drum (Pogonias cromis) in Virginia. Transactions of the American Fisheries Society, 102(3), 584–590. http://doi.org/10.1577/1548-8659(1973)102<584:AGADOT>2.0.CO;2
Black Drum	Pogonias cromis	Rooker, J. R., Kraus, R. T., & Secor, D. H. (2004). Dispersive behaviors of black drum and red drum: Is otolith Sr:Ca a reliable indicator of salinity history? Estuaries, 27(2), 334–341. http://doi.org/10.1007/BF02803389
Black Drum	Pogonias cromis	Ross, J. L., Pavela, J. S., & Chittenden, M. E. (1983). Seasonal occurrence of black drum , Pogonias cromis, and red drum, Sciaenops ocellatus, off Texas. Northeast Gulf Science, 6(1), 67–70. Retrieved from http://goms.disl.org/assets/goms_disl/uploads/toc/1977_1990/Vol6No1P67-70.pdf
Black Drum	Pogonias cromis	Saucier, M. H., & Baltz, D. M. (1993). Spawning site selection by spotted seatrout, Cynoscion nebulosus, and black drum, Pogonias cromis, in Louisiana. Environmental Biology of Fishes, 36, 257–272. Retrieved from http://link.springer.com/article/10.1007/BF00001722
Black Drum	Pogonias cromis	Silverman, M. J. (1979). Biological and fisheries data on black drum, Pogonias cromis (Linnaeus). Highlands, NJ: Sandy Hook Laboratory Northeast Fisheries Center.
Black Drum	Pogonias cromis	Simmons, E., & Breuer, J. (1962). A study of redfish, Sciaenops ocellata Linnaeus and black drum, Pogonias cromis Linnaeus. Publications of the Institute of Marine Science. Retrieved from http://repositories.tdl.org/tamug-ir/handle/1969.3/24686
Black Drum	Pogonias cromis	Tellechea, J. S., Norbis, W., Olsson, D., & Fine, M. L. (2011). Calls of the black drum (Pogonias cromis: Sciaenidae): Geographical differences in sound production between northern and southern hemisphere populations. Journal of Experimental Zoology Part A: Ecological Genetics and Physiology, 315 A(1), 48–55. http://doi.org/10.1002/jez.651
Black Drum	Pogonias cromis	Tilmant, J. T. (1989). A history and an overview of recent trends in the fisheries of Florida Bay. Bulletin of Marine Science, 44(1), 3–33. Retrieved from http://www.ingentaconnect.com/content/umrsmas/bullmar/1989/00000044/00000001/art00002
Black Grouper	Mycteroperca bonaci	Arreguín-sánchez, F., Munro, J. L., Balgos, M. C., & Pauly, D. (Eds.). (1996). Biology, Fisheries, and Culture of Tropical Groupers and Snappers. International Center for Living Aquatic Resources Management. Retrieved from http://pubs.iclarm.net/libinfo/Pdf/Pub CP6 48.pdf
Black Grouper	Mycteroperca bonaci	Brulé, T., Renán, X., Colás-Marrufo, T., Hauyon, Y., & Tuz-Sulub, A. (2003). Reproduction in the protogynous black grouper Mexico (Mycteroperca bonaci) (Poey) from the southern Gulf of Mexico. Fishery Bulletin, (101), 463–475. Retrieved from http://aquaticcommons.org/15140/
Black Grouper	Mycteroperca bonaci	Bullock, L. H., & Smith, G. B. (1991). Memoirs of the Hourglass Cruises: Sea Basses (Pisces: Serranidae). St. Petersburg, FL: Florida Marine Research Istititute. Retrieved from http://aquaticcommons.org/750/1/8.2.pdf
Black Grouper	Mycteroperca bonaci	Chiappone, M., Sluka, R., & Sealey, K. S. (2000). Groupers (Pisces: Serranidae) in fished and protected areas of the Florida Keys, Bahamas and northern Caribbean. Marine Ecology Progress Series, 198, 261–272. http://doi.org/10.3354/meps198261
Black Grouper	Mycteroperca bonaci	Claro, R., & Lindeman, K. C. (2003). Spawning aggregation sites of snapper and grouper species (Lutjanidae and Serranidae) on the insular shelf of Cuba. Gulf and Caribbean Research, 14(2), 91–106. http://doi.org/10.18785/gcr.1402.07
Black Grouper	Mycteroperca bonaci	Crabtree, R. E., & Bullock, L. H. (1998). Age, growth, and reproduction of black grouper, Mycteroperca bonaci, in Florida waters. Fishery Bulletin, 96(4), 735–753. Retrieved from http://sedarweb.org/docs/wsupp/S19_RD09_Crabtree and Bullock 1998.pdf
Black Grouper	Mycteroperca bonaci	Domeier, M. L., & Colin, P. L. (1997). Tropical Reef Fish Spawning Aggregrations: Defined and Reviewed. Bulletin of Marine Science, 60(3), 698–726. Retrieved from http://www.ingentaconnect.com/content/umrsmas/bullmar/1997/00000060/00000003/art00006
Black Grouper	Mycteroperca bonaci	Eklund, A.-M., McClellan, D. B., & Harper, D. E. (2000). Black grouper agregations in relation to protected areas within the Florida Keys National Marine Sanctuary. Bulletin of Marine Science, 66(3), 721–728. Retrieved from http://www.ingentaconnect.com/content/umrsmas/bullmar/2000/00000066/00000003/art00016
Black Grouper	Mycteroperca bonaci	Farmer, N. A., Malinowski, R. P., McGovern, M. F., & Rubec, P. J. (2016). Stock complexes for fisheries management in the Gulf of Mexico. Marine and Coastal Fisheries, 8(1), 177–201. http://doi.org/10.1080/19425120.2015.1024359
Black Grouper	Mycteroperca bonaci	Freitas, M. O., de Moura, R. L., Francini-Filho, R. B., & Minte-Vera, C. V. (2011). Spawning patterns of commercially important reef fish (Lutjanidae and Serranidae) in the tropical western South Atlantic. Scientia Marina, 75(1), 135–146. http://doi.org/10.3989/scimar.2011.75n1135
Black Grouper	Mycteroperca bonaci	Goode, G. B., & Bean, T. H. (1878). A note upon the black grouper (Epinephelus nigritus) (Holbrook, Gill) of the southern coast. Proceedings of the United States National Museum (Vol. 1). http://doi.org/10.5479/si.00963801.1-26.182
Black Grouper	Mycteroperca bonaci	Huntsman, G. R., Potts, J., & Mays, R. W. (1991). A preliminary assessment of the populations of seven species of grouper (Serranidae, Epinephelinae) in the Western Atlantic Ocean from Cape Hatteras, North Carolina to the Dry Tortugas, Florida. 43rd Gulf and Caribbean Fisheries Institute, 43, 193–213. Retrieved from http://aquaticcommons.org/12589/1/gcfi_43-10.pdf
Black Grouper	Mycteroperca bonaci	Jory, D. E., & Iversen, E. S. (1989). Species profiles: Life histories and environmental requirements of coastal fishes and invertebrates (South Florida): Black, red and Nassau groupers. U.S. Fish Wildl. Serv. Biol. Rep., 82(11), 21. Retrieved from http://oai.dtic.mil/oai/oai?verb=getRecord&amp;metadataPrefix=html&amp;identifier=ADA214299
Black Grouper	Mycteroperca bonaci	Lindholm, J., Kaufman, L., Miller, S., Wagschal, A., & Newville, M. (2005). Movement of yellowtail snapper (Ocyurus chrysurus Block 1790) and black grouper (Mycteroperca bonaci Poey 1860) in the northern Florida Keys National Marine Sanctuary as determined by acoustic telemetry. Marine Sanctuaries Conservation Series, (MSD-05-4), 17. Retrieved from http://aquaticcommons.org/2324/
Black Grouper	Mycteroperca bonaci	Luckhurst, B. E. (2010). Observations of a Black Grouper (Mycteroperca bonaci) Spawning Aggregation in Bermuda. Gulf and Caribbean Research, 22, 43–49. http://doi.org/10.18785/gcr.2201.05
Black Grouper	Mycteroperca bonaci	Luckhurst, B., & Ward, J. (1996). Analysis of trends in Bermuda’s fishery statistical database from 1975 to 1990 with reference to fishery management measures implemented during this period. Proceedings of the 44th Gulf and Caribbean Fisheries Institute. Retrieved from http://aquaticcommons.org/12687/1/gcfi_44-19.pdf
Black Grouper	Mycteroperca bonaci	Manooch, III, C. H., & Mason, D. L. (1987). Age and growth of the warsar grouper and black grouper from the southesast region of the united states. Northeast Gulf Science, 9(2), 65–75.
Black Grouper	Mycteroperca bonaci	O’Hop, J., & Beaver, R. (2009). Age, growth, and maturity of black goruper (Mycteroperca bonaci) - Crabtree and Bullock (1998) revisited, (1998), 1–51.
Black Grouper	Mycteroperca bonaci	Paz, G., & Sedberry, G. R. (2008). Identifying Black Grouper (Mycteroperca bonaci) Spawning Aggregations off Belize : Conservation and Management. Gulf and Caribbean Fisheries Institute Proceedings, 2, 577–584. Retrieved from http://nsgl.gso.uri.edu/flsgp/flsgpw07001/data/papers/090.pdf
Black Grouper	Mycteroperca bonaci	Renán, X., Brulé, T., Colás-Marrufo, T., Hauyon, Y., & Déniel, C. (2001). Preliminary results on the reproductive cycle of the black grouper, Mycteroperca bonaci, from the Southern Gulf of Mexico. Proceeding of the 52nd Gulf and Caribbean Fisheries Institute, 1–47. Retrieved from http://nsgl.gso.uri.edu/flsgp/flsgpw99004/flsgpw99004_part1.pdf
Black Grouper	Mycteroperca bonaci	Sala, E., Ballesteros, E., & Starr, R. (2001). Rapid Decline of Nassau Grouper Spawning Aggregations in Belize : Fishery Management and Conservation Needs Rapid Decline of Nassau Grouper Spawning Aggregations in Belize : Fishery Management and Conservation Needs. Fisheries, 26(10), 23–30. http://doi.org/10.1577/1548-8446(2001)026<0023
Black Grouper	Mycteroperca bonaci	Schärer, M. T., Nemeth, M. I., Rowell, T. J., & Appeldoorn, R. S. (2013). Sounds associated with the reproductive behavior of the black grouper (Mycteroperca bonaci). Marine Biology, 161(1), 141–147. http://doi.org/10.1007/s00227-013-2324-3
Black Grouper	Mycteroperca bonaci	SEDAR. (2010). Sedar 19 Gulf of Mexico and South Atlantic Black Grouper. SEDAR. North Charleston, SC.
Black Grouper	Mycteroperca bonaci	Sluka, R. D., Chiappone, M., & Sealey, K. M. S. (2001). Influence of habitat on grouper abundance in the Florida Keys, USA. Journal of Fish Biology, 58(3), 682–700. http://doi.org/10.1006/jfbi.2000.1478
Black Grouper	Mycteroperca bonaci	Sluka, R., Chiappone, M., Sullivan, K. M., Potts, T. A., Levy, J. M., Schmitt, E. F., & Meester, G. (1998). Density, species and size distribution of groupers (Serranidae) in three habitats at Elbow Reef, Florida Keys. Bulletin of Marine Science, 62(1), 219–228. Retrieved from http://www.ingentaconnect.com/content/umrsmas/bullmar/1998/00000062/00000001/art00020
Black Grouper	Mycteroperca bonaci	Teixeira, S. F., Ferreira, B. P., & Padovan, I. P. (2004). Aspects of fishing and reproduction of the black grouper Mycteroperca bonaci (Poey, 1860) (Serranidae: Epinephelinae) in the Northeastern Brazil. Neotropical Ichthyology, 2(1), 19–30. http://doi.org/10.1590/s1679-62252004000100004
Cubera	Lutjanus cyanopterus	Arreguín-sánchez, F., Munro, J. L., Balgos, M. C., & Pauly, D. (Eds.). (1996). Biology, Fisheries, and Culture of Tropical Groupers and Snappers. International Center for Living Aquatic Resources Management. Retrieved from http://pubs.iclarm.net/libinfo/Pdf/Pub CP6 48.pdf
Cubera	Lutjanus cyanopterus	Ault, J. S., & Luo, J. (1998). Coastal bays to coral reefs: Systems use of scientific data visualization in Reef Fishery management. Ices C. M. 1998/S:3, 11. Retrieved from http://www.ices.dk/sites/pub/CM Doccuments/1998/S/S0398.pdf
Cubera	Lutjanus cyanopterus	Biggs, C., & Nemeth, R. (2016). Spatial and temporal movement patterns of two snapper species at a multi-species spawning aggregation. Marine Ecology Progress Series, 558, 129–142. http://doi.org/10.3354/meps11846
Cubera	Lutjanus cyanopterus	Carter, J., & Perrine, D. (1994). A spawning aggregation of dog snapper, Lutjanus jocu (Pisces: Lutjanidae) in Belize, Central America. Bulletin of Marine Science, 55(1), 228–234.
Cubera	Lutjanus cyanopterus	Claro, R., & Lindeman, K. C. (2003). Spawning aggregation sites of snapper and grouper species (Lutjanidae and Serranidae) on the insular shelf of Cuba. Gulf and Caribbean Research, 14(2), 91–106. http://doi.org/10.18785/gcr.1402.07
Cubera	Lutjanus cyanopterus	Claro, R., & Parenti, L. R. (2001). The marine ichthyofauna of Cuba. (R. Claro, K. C. Lindeman, & L. R. Parenti, Eds.)Ecology of the marine fishes of Cuba. Smithsonian Institution Press. Retrieved from http://trove.nla.gov.au/work/34261158?selectedversion=NBD22294664copyright protected
Cubera	Lutjanus cyanopterus	Claro, R., Mitcheson, Y. S. de, Lindeman, K. C., & García-Cagide, A. R. (2009). Historical analysis of Cuban commercial fishing effort and the effects of management interventions on important reef fishes from 1960-2005. Fisheries Research, 99(1), 7–16. http://doi.org/10.1016/j.fishres.2009.04.004
Cubera	Lutjanus cyanopterus	Domeier, M. L., & Colin, P. L. (1997). Tropical Reef Fish Spawning Aggregrations: Defined and Reviewed. Bulletin of Marine Science, 60(3), 698–726. Retrieved from http://www.ingentaconnect.com/content/umrsmas/bullmar/1997/00000060/00000003/art00006
Cubera	Lutjanus cyanopterus	Domeier, M. L., Koenig, C., & Coleman, F. (1996). Reproductive Biology of the Gray Snapper (Lutjanus griseus), with notes on Spawning for other Western Atlantic Snappers (Lutjanidae). In F. Arreguín-sánchez, J. L. Munro, M. C. Balgos, & D. Pauly (Eds.), Biology and Culture of tropical groupers and snappers (48th ed., p. 449). ICLARM Conf. Proc. Retrieved from http://pubs.iclarm.net/libinfo/Pdf/Pu…
Cubera	Lutjanus cyanopterus	Farmer, N. A., Malinowski, R. P., McGovern, M. F., & Rubec, P. J. (2016). Stock complexes for fisheries management in the Gulf of Mexico. Marine and Coastal Fisheries, 8(1), 177–201. http://doi.org/10.1080/19425120.2015.1024359
Cubera	Lutjanus cyanopterus	Gilhen, J., Gruchy, C. G., & McAllister, D. E. (1984). The cubera snapper, Lutjanus cyanopterus (Cuvier) (Pisces: Lutjanidae) new to Nova Scotia and Canada. Proceedings N.S. Institute of Science, 34, 177–180.
Cubera	Lutjanus cyanopterus	Hastings, P. A. (2003). Ecology of the Marine Fishes of Cuba. Copeia, 2003(1), 207–208. http://doi.org/10.1643/0045-8511(2003)003[0207:]2.0.CO;2
Cubera	Lutjanus cyanopterus	Heyman, W. D., & Kjerfve, B. (2008). Characterization of Transient Multi Species Reef Fish Spawning Aggregations At Gladden Spit , Belize. Bulletin of Marine Science, 83(3), 531–551. Retrieved from http://www.ingentaconnect.com/content/umrsmas/bullmar/2008/00000083/00000003/art00006
Cubera	Lutjanus cyanopterus	Heyman, W. D., Graham, R. T., Kjerfve, B., & Johannes, R. E. (2001). Whale sharks Rhincodon typus aggregate to feed on fish spawn in Belize. Marine Ecology Progress Series, 215, 275–282. http://doi.org/10.3354/meps215275
Cubera	Lutjanus cyanopterus	Heyman, W. D., Kjerfve, B., Graham, R. T., Rhodes, K. L., & Garbutt, L. (2005). Characterizing spawning aggregations of cubera snappers, Lutjanus cyanopterus (Pisces: Lutjanidae) on the Belize Barrier Reef over a 6 year period. Journal of Fish Biology, 67(1), 83–101. http://doi.org/10.1111/j.1095-8649.2005.00714.x
Cubera	Lutjanus cyanopterus	Kadison, E., Nemeth, R. S., Herzlieb, S., & Blondeau, J. (2006). Temporal and spatial dynamics of Lutjanus cyanopterus and L. jocu (Pisces: Lutjanidae) spawning aggregations on a multi-species spawning site in the USVI. Revista de Biología Tropical., 54((suppl. 3)), 69–78. Retrieved from http://www.scielo.sa.cr/scielo.php?pid=S0034-77442006000600012&amp;script=sci_arttext&amp;tlng=e
Cubera	Lutjanus cyanopterus	Lindeman, K. C., & DeMaria, D. (2005). Juveniles of the Caribbean’s largest coral reef snapper do not use reefs. Coral Reefs, 24(3), 359–359. http://doi.org/10.1007/s00338-005-0015-3
Cubera	Lutjanus cyanopterus	Lindeman, K. C., Pugliese, R., Waugh, G. T., & Ault, J. S. (2000). Developmental Patterns Withn a Multispeces Reef Fishery : Management Applications for Essential Fish Habitats and Protected Areas. Bulletin of Marine Science, 66(3), 929–956. Retrieved from http://www.ingentaconnect.com/content/umrsmas/bullmar/2000/00000066/00000003/art00029
Cubera	Lutjanus cyanopterus	Martinez-Andrade, F. (2003). A comparison oflife histories and ecological aspects among snappers (Pisces: Lutjanidae). PhD Thesis, Louisiana State University. Retrieved from http://s3.amazonaws.com/academia.edu.documents/7864488/martinez-andrade_dis.pdf?AWSAccessKeyId=AKIAJ56TQJRTWSMTNPEA&Expires=1472572843&Signature=8LLm1bsENHivoDcjehKwAfP5HVo=&response-content-disposition=inline; filename=A_com…
Cubera	Lutjanus cyanopterus	Méndez-Jiménez, A., Heyman, W. D., & DiMarco, S. F. (2015). Surface drifter movement indicates onshore egg transport from a reef fish spawning aggregation. Physical Geography, 36(4), 353. http://doi.org/10.1080/02723646.2015.1023243
Cubera	Lutjanus cyanopterus	Noaa. (2005). Stock Assessment and Fishery Evaluation Report for the Snapper Grouper Fishery of the South Atlantic November 18, 2005. South Atlantic Fishery Management Council. Retrieved from http://sero.nmfs.noaa.gov/sustainable_fisheries/safe_reports/documents/pdfs/snapper_grouper_2005_safe.pdf
Cubera	Lutjanus cyanopterus	Paris, C. B., Cowen, R. K., Claro, R., & Lindeman, K. C. (2005). Larval transport pathways from Cuban snapper (Lutjanidae) spawning aggregations based on biophysical modeling. Marine Ecology Progress Series, 296, 93–106. http://doi.org/10.3354/meps296093
Cubera	Lutjanus cyanopterus	Rivas, L. R. (1949). A record of Lutjanid fish (Lutjanus cyanopterus) for the Atlantic Coast of the United States, with note on related species of the genus. Copeia, 1949(2), 150–152. http://doi.org/10.2307/1438494
Gag Grouper	Mycteroperca microlepis	Bacheler, N. M., & Buckel, J. A. (2004). Does hook type influence the catch rate, size, and injury of grouper in a North Carolina commercial fishery? Fisheries Research, 69(1), 303–311. http://doi.org/10.1016/j.fishres.2004.07.001
Gag Grouper	Mycteroperca microlepis	Brulé, T., Déniel, C., Colás-Marrufo, T., & Renán, X. (2003). Reproductive biology of gag in the southern Gulf of Mexico. Journal of Fish Biology, 63, 1505–1520. http://doi.org/10.1046/j.1095-8649.2003.00263.x,availableonlineathttp://www.blackwell-synergy.com
Gag Grouper	Mycteroperca microlepis	Carruthers, T. R., Walter, J. F., McAllister, M. K., Bryan, M. D., & Wilberg, M. (2015). Modelling age-dependent movement: an application to red and gag groupers in the Gulf of Mexico. Canadian Journal of Fisheries and Aquatic Sciences, 72(8), 1159–1176. http://doi.org/10.1139/cjfas-2014-0471
Gag Grouper	Mycteroperca microlepis	Chagaris, D., & Mahmoudi, B. (2013). Natural Mortality of Gag Grouper from 1950 to 2009 Generated by an Ecosim Model. SEDAR 33-DW07. North Charleston, SC.
Gag Grouper	Mycteroperca microlepis	Chapman, R. W., Sedberry, G. R., Koenig, C. C., & Eleby, B. M. (1999). Stock Identification of Gag, Mycteroperca microlepis, Along the Southeast Coast of the United States. Marine Biotechnology, 1(1), 137–146. Retrieved from http://www.ncbi.nlm.nih.gov/pubmed?Db=pubmed&Cmd=Retrieve&list_uids=10373622&dopt=abstractplus
Gag Grouper	Mycteroperca microlepis	Coleman, F. C., Koenig, C. C., & Collins, L. A. (1996). Reproductive styles of shallow-water groupers (Pisces: Serranidae) in the eastern Gulf of Mexico and the consequences of fishing spawning aggregations. Environmental Biology of Fishes, 47(47), 129–141. http://doi.org/10.1007/BF00005035
Gag Grouper	Mycteroperca microlepis	Coleman, F. C., Koenig, C. C., Eleby, B. M., Bacheler, N. M., Bacheler, N. M., & Buckle, J. A. (n.d.). Gag Grouper (Mycteroperca microlepis). Retrieved February 5, 2016, from https://www.marinelab.fsu.edu/labs/ck/
Gag Grouper	Mycteroperca microlepis	Coleman, F. C., Scanlon, K. M., & Koenig, C. C. (2011). Groupers on the edge: shelf edge spawning habitat in and around marine reserves of the Northeastern Gulf of Mexico. Professional Geographer, 63(4), 456–474. http://doi.org/10.1080/00330124.2011.585076
Gag Grouper	Mycteroperca microlepis	Coleman, F., Chapman, R., & Koenig, C. (2000). Review of Kenchington Document.“Management of the Gulf of Mexico Gag Grouper Fisheries: A Reconsideration.” Fisheries, 25(3), 14–21. Retrieved from http://www.bio.fsu.edu/ifre/pdf Controversies/Coleman_et_al-Rebuttal.pdf
Gag Grouper	Mycteroperca microlepis	Collins, L. A., Johnson, A. G., Koenig, C. C., & Baker, M. S. (1998). Reproductive patterns, sex ratio, and fecundity in gag, Mycteroperca microlepis (Serranidae), a protogynous grouper from the Northeastern Gulf of Mexico. Fishery Bulletin, 96(3), 415–427. Retrieved from http://fisherybulletin.nmfs.noaa.gov/963/collins.pdf
Gag Grouper	Mycteroperca microlepis	Collins, M. R., Waltz, C. W., Roumiliat, W. A., & Stubbs, D. L. (1987). Contribution to the life history and reproductive biology of gag, Mycteroperca microlepis (Serranidae) in the South Atlantic Bight. Fishery Bulletin, 85(3), 648–950. Retrieved from http://fishbull.noaa.gov/853/collins.pdf
Gag Grouper	Mycteroperca microlepis	Ellis, R. D., & Powers, J. E. (2012). Gag grouper, marine reserves, and density-dependent sex change in the Gulf of Mexico. Fisheries Research, 115–116, 89–98. http://doi.org/10.1016/j.fishres.2011.11.024
Gag Grouper	Mycteroperca microlepis	Farmer, N. A., Malinowski, R. P., McGovern, M. F., & Rubec, P. J. (2016). Stock complexes for fisheries management in the Gulf of Mexico. Marine and Coastal Fisheries, 8(1), 177–201. http://doi.org/10.1080/19425120.2015.1024359
Gag Grouper	Mycteroperca microlepis	Fitzhugh, G. R., Koenig, C. C., Coleman, F. C., Grimes, C. B., & Sturges III, W. (2005). Spatial and temporal patterns in fertilization and settlement of young gag (Mycteroperca microlepis) along the West Florida Shelf. Bulletin of Marine Science, 77(3), 377–396. Retrieved from http://www.ingentaconnect.com/content/umrsmas/bullmar/2005/00000077/00000003/art00004
Gag Grouper	Mycteroperca microlepis	Fitzhugh, G. R., Lyon, H. M., Collins, L. a, Walling, W. T., & Lombardi-Carlson, L. (2006). Update of gag (Mycteroperca microlepis) reproductive parameters: Eastern Gulf of Mexico, SEDAR 10 Data Workshop.
Gag Grouper	Mycteroperca microlepis	Gentner, B. (2009). Allocation analysis of the Gulf of Mexico gag and red grouper fisheries. Prepared for the Coastal Conservation Association. Retrieved from http://gulfcouncil.org/Beta/GMFMCWeb/downloads/BB 2009-04/B - 4(b) Grouper Allocation Report by Gentner for CCA.pdf
Gag Grouper	Mycteroperca microlepis	Gilmore, R. G., & Jones, R. S. (1992). Color Variation and Associated Behavior in the Epinepheline Groupers, Mycteroperca microlepis (Goode and Bean) and M. phenax (Jordan and Swain). Bulletin of Marine Science, 51(1), 83–103. Retrieved from http://www.ingentaconnect.com/content/umrsmas/bullmar/1992/00000051/00000001/art00009
Gag Grouper	Mycteroperca microlepis	Harris, P., & Collins, M. (2000). Age, growth, and age at maturity for gag, Mycteroperca microlepis, from the southeastern United States during 1976-1982 and 1994-1995. Bull. Mar. Sci, 66(1), 105–117. Retrieved from http://scholar.google.com/scholar?hl=en&btnG=Search&q=intitle:AGE+,+GROWTH+AND+AGE+AT+MATURITY+OF+GAG+,+MYCTEROPERCA+MICROLEPIS+,+FROM+THE+SOUTHEASTERN+UNITED+STATES+DURING+1994+?+199…
Gag Grouper	Mycteroperca microlepis	Heppell, S. A. (2005). Seasonal fluctuations in androgen levels in females of the hermaphroditic gag, Mycteroperca microlepis, with an emphasis on juvenile animals. Comparative Biochemistry and Physiology Part A:, 142(1), 84–91. http://doi.org/10.1016/j.cbpa.2005.07.009
Gag Grouper	Mycteroperca microlepis	Heppell, S. A., & Sullivan, C. V. (2000). Identification of gender and reproductive maturity in the absence of gonads: muscle tissue levels of sex steroids and vitellogenin in gag (Mycteroperca microlepis). Canadian Journal of Fisheries and Aquatic Sciences, 57(1), 148–159. http://doi.org/10.1139/f99-188
Gag Grouper	Mycteroperca microlepis	Heppell, S. S., Heppell, S. A., Coleman, F. C., & Koenig, C. C. (2006). Models to compare management options for a protogynous fish. Ecological Applications, 16(1), 238–249. http://doi.org/10.1890/04-1113
Gag Grouper	Mycteroperca microlepis	Hood, P. B., & Schlieder, R. A. (1992). Age, growth, and reproduction of gag, Mycteroperca microlepis (Pisces: Serranidae), in the eastern Gulf of Mexico. Bulletin of Marine Science, 51(3), 337–352. Retrieved from http://www.ingentaconnect.com/content/umrsmas/bullmar/1992/00000051/00000003/art00007
Gag Grouper	Mycteroperca microlepis	Johnson, A. G., Collins, L. A., & Isely, J. J. (1993). Age-size structure of gag, Mycteroperca microlepis, from the Northeastern Gulf of Mexico. Northeast Gulf Science, 13(1), 59–63. Retrieved from http://goms.disl.org/assets/goms_disl/uploads/toc/1991_2010/Vol13No1P59-63.pdf
Gag Grouper	Mycteroperca microlepis	Kiel, B. L. (2004). Homing and spatial use of gag grouper, Mycteroperca microlepis. M.S. Thesis. University of Florida. Retrieved from http://purl.fcla.edu/fcla/etd/UFE0007040
Gag Grouper	Mycteroperca microlepis	Koenig, C. C. (1998). Absolute Abundance and Survival of Juvenile Gags in Sea Grass Beds of the Northeastern Gulf of Mexico. Transactions of the American Fisheries Society, 127(1), 44–55. http://doi.org/10.1577/1548-8659(1998)127<0044
Gag Grouper	Mycteroperca microlepis	Koenig, C. C., & Coleman, F. C. (2013). Protection of grouper and red snapper spawning in shelf-edge marine reserves of the Northeastern Gulf of Mexico: demographics, movements, survival and spilllover effects: SEDAR 33. SEDAR (Vol. 33). North Charleston, SC. Retrieved from http://sedarweb.org/docs/wpapers/SEDAR33-DW02- Koenig and Coleman 2011 Protection of spawning stock in reserves- demo%2C mov…
Gag Grouper	Mycteroperca microlepis	Koenig, C. C., & Coleman, F. C. (2013). Protection of Grouper and Red Snapper Spawning in Shelf-Edge Marine Reserves of the Northeastern Gulf of Mexico: Demographics, Movements, Survival and Spillover Effects. Sedar33-Dw02. Sedar. SEDAR33-DW02, North Charleston, SC.
Gag Grouper	Mycteroperca microlepis	Koenig, C. C., Coleman, F. C., & Collins, L. A. (1996). Reproduction in Gag (Mycteroperca microlepis) (Pisces: Serranidae) in the Eastern Gulf of Mexico and the Consequences of Fishing Spawning Aggregations. In F. Arreguín-sánchez, J. L. Munro, M. C. Balgos, & D. Pauly (Eds.), Biology, Fisheries, and Culture of Tropical Groupers and Snappers (Vol. 47, pp. 129–141).
Gag Grouper	Mycteroperca microlepis	Koenig, C., & Colin, P. L. (1992). Absolute abundance and survival of juvenile gag grouper, Mycteroperca microlepis, in seagrass beds of the northeastern Gulf of Mexico. Proceedings of the Gulf and Caribbean Fisheries Institute, 45. Retrieved from http://aquaticcommons.org/12769/1/gcfi_45-3.pdf
Gag Grouper	Mycteroperca microlepis	Lombardi, L. A., Fitzhugh, G. R., & Barnett, B. (2013). SEDAR33-DW22. North Charleston, SC.
Gag Grouper	Mycteroperca microlepis	Manooch, C. S., & Haimovici, M. (1978). Age and Growth of the Gag, Mycteroperca microlepis, and size-age composition of the recreational catch off the Southeastern United States. Transactions of the American Fisheries Society, 107(2), 234–240. http://doi.org/10.1577/1548-8659(1978)107<234
Gag Grouper	Mycteroperca microlepis	McErlean, A. J., & Smith, C. L. (1964). The Age of Sexual Succession in the Protogynous Hermaphrodite Mycteroperca microlepis. Transactions of the American Fisheries Society, 93(3), 301. http://doi.org/10.1577/1548-8659(1964)93[301:taossi]2.0.co;2
Gag Grouper	Mycteroperca microlepis	McGovern, J. C., Sedberry, G. R., Meister, H. S., Westendorff, T. M., Wyanski, D. M., & Harris, P. J. (2005). A tag and recapture study of gag, Mycteroperca microlepis, off the southeastern U.S. Bulletin of Marine Science, 76(1), 47–59. Retrieved from http://www.ingentaconnect.com/content/umrsmas/bullmar/2005/00000076/00000001/art00003
Gag Grouper	Mycteroperca microlepis	McGovern, J., & Wyanski, D. (1998). Changes in the sex ratio and size at maturity of gag, Mycteroperca microlepis, from the Atlantic coast of the southeastern United States. Fishery Bulletin, 96, 797–807. Retrieved from http://fishbull.noaa.gov/964/mcgovern.pdf
Gag Grouper	Mycteroperca microlepis	Noaa. (2005). Stock Assessment and Fishery Evaluation Report for the Snapper Grouper Fishery of the South Atlantic November 18, 2005. South Atlantic Fishery Management Council. Retrieved from http://sero.nmfs.noaa.gov/sustainable_fisheries/safe_reports/documents/pdfs/snapper_grouper_2005_safe.pdf
Gag Grouper	Mycteroperca microlepis	NOAA. (2015). Modifications to gag minimum size limits, recreational season and black grouper minimum size limits. Revised Options Paper for a Framework Action to the Fishery Management Plan for the Reef Fish Resources of the Gulf of Mexico. Gulf of Mexico Fishery Management Council. Retrieved from http://gulfcouncil.org/council_meetings/BriefingMaterials/BB-08-2015/B - 5 Updated Options Paper - …
Gag Grouper	Mycteroperca microlepis	Rudershausen, P. J., Williams, E. H., Buckel, J. A., Potts, J. C., & Manooch, C. S. (2008). Comparison of reef fish catch per unit effort and total mortality between the 1970s and 2005-2006 in Onslow Bay, North Carolina. Transactions of the American Fisheries Society, 137(5), 1389–1405. http://doi.org/10.1577/T07-159.1
Gag Grouper	Mycteroperca microlepis	Rueter, J. (2004). Gag History of Management in the Gulf of Mexico. SEDAR-10-DW-16. Retrieved from http://sedarweb.org/docs/wpapers/S10DW16 HistMgmtGOM.pdf
Gag Grouper	Mycteroperca microlepis	Sala, E., Ballesteros, E., & Starr, R. (2001). Rapid Decline of Nassau Grouper Spawning Aggregations in Belize : Fishery Management and Conservation Needs Rapid Decline of Nassau Grouper Spawning Aggregations in Belize : Fishery Management and Conservation Needs. Fisheries, 26(10), 23–30. http://doi.org/10.1577/1548-8446(2001)026<0023
Gag Grouper	Mycteroperca microlepis	Schirripa, M. J., & Burns, K. M. (1997). Growth estimates for three species of reef fish in the eastern Gulf of Mexico. Bulletin of Marine Science, 61(3), 581–591. Retrieved from http://www.ingentaconnect.com/content/umrsmas/bullmar/1997/00000061/00000003/art00010
Gag Grouper	Mycteroperca microlepis	SEDAR. (2006). SEDAR 10 Gulf of Mexico Gag grouper Stock Assessment Report. SEDAR. North Charleston, SC. Retrieved from http://sedarweb.org/docs/sar/S10SAR2 GOM Gag Assessment Report.pdf
Gag Grouper	Mycteroperca microlepis	SEDAR. (2009). Stock Assessment of Gag in the Gulf of Mexico -- SEDAR Update Assessment. Report of Assessment Workshop. Miami, FL. Retrieved from http://sedarweb.org/docs/wsupp/SEDAR33-RD09- SEFSC 2010 Gag Rerun Report.pdf
Gag Grouper	Mycteroperca microlepis	SEDAR. (2014). SEDAR 33 - Gulf of Mexico Gag Stock Assessment Report. SEDAR. North Charleston, SC. Retrieved from http://www.sefsc.noaa.gov/sedar/Sedar_Workshops.jsp?WorkshopNum=33
Gag Grouper	Mycteroperca microlepis	Strelcheck, A. J., Fitzhugh, G. R., Coleman, F. C., & Koenig, C. C. C. N.-000. (2003). Otolith-fish size relationship in juvenile gag（Mycteroperca microlepis）of the eastern Gulf of Mexico: a comparison of growth rates between laboratory and field populations. Fisheries Research, 60, 255–265. http://doi.org/Pii S0165-7836(02)00171-6 Doi 10.1016/S0165-7836(02)00171-6
Gag Grouper	Mycteroperca microlepis	Weisberg, R. H., Zheng, L., & Peebles, E. (2014). Gag grouper larvae pathways on the West Florida Shelf. Continental Shelf Research, 88, 11–23. http://doi.org/10.1016/j.csr.2014.06.003
Goliath Grouper	Epinephelus itajara	Aguilar-Perera, A., González-Salas, C., Tuz-Sulub, A., & Villegas-Hernández, H. (2009). Fishery of the Goliath Grouper (Epinephelus itajara) based on local ecological knowledge and fishery records in Yucatan, México. Revista de Biologia Tropical, 57(3), 557–566. Retrieved from http://www.ncbi.nlm.nih.gov/pubmed?Db=pubmed&Cmd=Retrieve&list_uids=19928454&dopt=abstractplus
Goliath Grouper	Epinephelus itajara	Brusher, J. H., & Schull, J. (2009). Non-lethal age determination for juvenile goliath grouper Epinephelus itajara from southwest Florida. Endangered Species Research, 7(3), 205–212. http://doi.org/10.3354/esr00126
Goliath Grouper	Epinephelus itajara	Bullock, L. H., Murphy, M. D., Godcharles, M. F., & Mitchell, M. E. (1992). Age, growth, and reproduction of jewfish Epinephelus itajara in the eastern Gulf of Mexico. Fishery Bulletin, 90, 243–249. Retrieved from http://m.myfwc.com/media/2925245/goliath_grouper_g.pdf
Goliath Grouper	Epinephelus itajara	Cass-Calay, S. L., & Schmidt, T. W. (2009). Monitoring changes in the catch rates and abundance of juvenile goliath grouper using the ENP creel survey, 1973–2006. Endangered Species Research, 7, 183–193. http://doi.org/10.3354/esr00139
Goliath Grouper	Epinephelus itajara	Coleman, F. C., & Koenig, C. C. (2010). The effects of fishing, climate change, and other anthropogenic disturbances on red grouper and other reef fishes in the Gulf of Mexico. Integrative and Comparative Biology, 50(2), 201–212. http://doi.org/10.1093/icb/icq072
Goliath Grouper	Epinephelus itajara	COLIN, P. L. P. L. (1990). Preliminary Investigations of Reproductive Activity of the Jewfish, Epinephelus itajara (Pisces: Serranidae). Proceeding of the 43rd Gulf and the Caribbean Fisheries Institute, 1990(September), 139–147. Retrieved from http://www.sefsc.noaa.gov/sedar/download/SEDAR23_RD_23_Colin_gcfi43.pdf?id=DOCUMENT
Goliath Grouper	Epinephelus itajara	Collins, A. B. (2008). A Preliminary Assessment of the Abundance and Size Distribution of Goliath Grouper Epinephelus itajara Within a Defined Region of the Central Eastern Gulf of Mexico. Proceedings of the Gulf and Caribbean Fisheries Institute, 61, 184–190. Retrieved from http://nsgl.gso.uri.edu/flsgp/flsgpw08001/data/papers/028.pdf
Goliath Grouper	Epinephelus itajara	Collins, A. B., & Barbieri, L. R. (2010). Behavior, Habitat and Abundance of the Goliath Gropuer, Epinephelus itajara, in the Central Eastern Gulf of Mexico. Fish and Wildlife Research Institute, Florida Fish and Wildlife Conservation Commission. Retrieved from http://myfwc.com/media/2925224/crp_goliath.pdf
Goliath Grouper	Epinephelus itajara	Eklund, A.-M., & Schull, J. (2001). A stepwise approach to investigating the movement patterns and habitat utilization of Goliath grouper, Epinephelus itajara, using conventional tagging, acoustic telemetry and satelite tracking. In J. R. Sibert & J. L. Nielsen (Eds.), Electronic tagging and tracking in marine fisheries (pp. 189–216). http://doi.org/10.1007/978-94-017-1402-0_9
Goliath Grouper	Epinephelus itajara	Farmer, N. A., Malinowski, R. P., McGovern, M. F., & Rubec, P. J. (2016). Stock complexes for fisheries management in the Gulf of Mexico. Marine and Coastal Fisheries, 8(1), 177–201. http://doi.org/10.1080/19425120.2015.1024359
Goliath Grouper	Epinephelus itajara	Félix-Hackradt, F. C., & Hackradt, C. W. (2008). Populational study and monitoring of the goliath grouper, Epinephelus itajara (Lichtenstein, 1822), in the coast of Paraná, Brazil. Brazilian Journal of Nature Conservation, 6, 141–156.
Goliath Grouper	Epinephelus itajara	Gerhardinger, L. C., Bertoncini, A. a, & Hostim-silva, M. (2006). Local ecological knowledge and Goliath grouper spawning aggregations in the South Atlantic Ocean : Goliath grouper spawning aggregations in Brazil. SPC Traditional Marine Resource Management and Knowledge Information Bulletin, 20(December), 33–34. Retrieved from http://citeseerx.ist.psu.edu/viewdoc/download?doi=10.1.1.599.5678&rep=…
Goliath Grouper	Epinephelus itajara	Gerhardinger, L. C., Hostim-Silva, M., Medeiros, R. P., Matarezi, J., Bertoncini, Á. A., Freitas, M. O., & Ferreira, B. P. (2009). Fishers’ resource mapping and goliath grouper Epinephelus itajara (Serranidae) conservation in Brazil. Neotropical Ichthyology, 7(1), 93–102. http://doi.org/10.1590/S1679-62252009000100012
Goliath Grouper	Epinephelus itajara	Giglio, V. J., Adelir-Alves, J., Gerhardinger, L. C., Grecco, F. C., Daros, F. A., & Bertoncini, A. A. (2014). Habitat use and abundance of goliath grouper Epinephelus itajara in Brazil: A participative survey. Neotropical Ichthyology, 12(4), 803–810. http://doi.org/10.1590/1982-0224-20130166
Goliath Grouper	Epinephelus itajara	Graham, R. T., Rhodes, K. L., & Castellanos, D. (2009). Characterization of the goliath grouper Epinephelus itajara fishery of southern Belize for conservation planning. Endangered Species Research, 7(3), 195–204. http://doi.org/10.3354/esr00187
Goliath Grouper	Epinephelus itajara	Kingsley, M. C. S. (2004). The goliath grouper in southern Florida: assessment review and advisory report. Prepared for the South Atlantic Fishery Management Council. Southeast Data and Assessment Review. Retrieved from http://myfwc.com/media/2925230/goliath_grouper_b.pdf
Goliath Grouper	Epinephelus itajara	Koenig C, Bueno L, Coleman F, Cusick J, Ellis R, Kingon K, Locascio J, Malinowski C, Murie D, Stallings C (2017) Diel, lunar, and seasonal spawning patterns of the Atlantic goliath grouper, Epinephelus itajara , off Florida, United States. Bull Mar Sci 93:391–406
Goliath Grouper	Epinephelus itajara	Koenig, C. C., & Coleman, F. C. (2009). Population density, demographics, and predation effects of adult goliath grouper. MARFIN Project Final Report. St. Teresa, FL. Retrieved from http://www.reef.org/reef_files/SEDAR23_RD_19_GoliathFINAL.pdf
Goliath Grouper	Epinephelus itajara	Koenig, C. C., Coleman, F. C., & Kingon, K. (2011). Pattern of recovery of the goliath grouper Epinephelus itajara population in the southeastern US. Bulletin of Marine Science, 87(4), 891–911. http://doi.org/10.5343/bms.2010.1056
Goliath Grouper	Epinephelus itajara	Koenig, C. C., Coleman, F. C., Eklund, A., Schull, J., & Ueland, J. (2007). Mangroves as essential nursery habitat for Goliath Grouper (Epinephelus itajara). Bulletin of Marine Science, 80(3), 567–585. Retrieved from http://www.ingentaconnect.com/content/umrsmas/bullmar/2007/00000080/00000003/art0000010
Goliath Grouper	Epinephelus itajara	Lara, M. R., Schull, J., Jones, D. L., & Allman, R. (2009). Early life history stages of goliath grouper Epinephelus itajara (Pisces: Epinephelidae) from Ten Thousand Islands, Florida. Endangered Species Research, 7, 221–228. http://doi.org/10.3354/esr00193
Goliath Grouper	Epinephelus itajara	Mann, D. A., Locascio, J. V, Coleman, F. C., & Koenig, C. C. (2009). Goliath grouper Epinephelus itajara sound production and movement patterns on aggregation sites. Endangered Species Research, 7, 229. http://doi.org/10.3354/esr00109
Goliath Grouper	Epinephelus itajara	McClenachan, L. (2009). Historical declines of goliath grouper populations in South Florida, USA. Endangered Species Research, 7, 175–181. http://doi.org/10.3354/esr00167
Goliath Grouper	Epinephelus itajara	Murie, D. J., Parkyn, D. C., Koenig, C. C., Coleman, F. C., Schull, J., & Frias-Torres, S. (2009). Evaluation of finrays as a non-lethal ageing method for protected goliath grouper Epinephelus itajara. Endangered Species Research, 7(3), 213–220. http://doi.org/10.3354/esr00146
Goliath Grouper	Epinephelus itajara	Noaa. (2005). Stock Assessment and Fishery Evaluation Report for the Snapper Grouper Fishery of the South Atlantic November 18, 2005. South Atlantic Fishery Management Council. Retrieved from http://sero.nmfs.noaa.gov/sustainable_fisheries/safe_reports/documents/pdfs/snapper_grouper_2005_safe.pdf
Goliath Grouper	Epinephelus itajara	Pina-Amargós, F., & González-Sansón, G. (2009). Movement patterns of goliath grouper Epinephelus itajara around southeast Cuba: implications for conservation. Endangered Species Research, 7, 243–247. http://doi.org/10.3354/esr00192
Goliath Grouper	Epinephelus itajara	Porch, C. E., & Eklund, A. M. (2004). Standardized visual counts of goliath grouper off south Florida and their possible use as indices of abundance. Gulf of Mexico Science, 2, 155–163. Retrieved from http://www.reef.org/reef_files/SEDAR23_RD_18_Porch&Eklund_GMS2004.pdf
Goliath Grouper	Epinephelus itajara	Porch, C. E., Eklund, A. M., & Scott, G. P. (2003). An assessment of rebuilding times for goliath grouper. SEDAR 6-RW-3. Southeast Fisheries Science Center, Miami, FL. Retrieved from http://www.reefbase.org/resource_center/publication/pub_25806.aspx
Goliath Grouper	Epinephelus itajara	Pusack, T. J., & Graham, R. T. (2009). Threatened fishes of the world: Epinephelus itajara (Lichtenstein, 1822) (Epinephelidae, formerly Serranidae). Environmental Biology of Fishes, 86(2), 293–294. http://doi.org/10.1007/s10641-009-9509-0
Goliath Grouper	Epinephelus itajara	Sadovy, Y., & Eklund, A. M. (1999). Synopsis of biological data on the Nassau grouper, Epinephelus striatus (Bloch, 1792), and the jewfish, E. itajara (Lichenstein, 1822). NOAA Technical Report NMFS 146. Retrieved from http://aquaticcommons.org/2523/
Goliath Grouper	Epinephelus itajara	SEDAR. (2004). Complete Stock Assessment Report of SEDAR 6 Goliath Grouper. SEDAR. North Charleston, SC. Retrieved from http://sedarweb.org/docs/sar/SEDAR6_SAR1_Goliathall.pdf
Goliath Grouper	Epinephelus itajara	SEDAR. (2011). SEDAR 23 Stock Assessment Report South Atlantic and Gulf of Mexico Goliath Grouper. SEDAR. North Charleston, SC. Retrieved from http://sedarweb.org/docs/sar/S23_SAR_complete_and_final.pdf
Goliath Grouper	Epinephelus itajara	Sedar. (2016). Southeastern U . S . Goliath Grouper. SEDAR47, North Charleston, SC.
Gray Triggerfish	Balistes capriscus	Bernardes, R. A. (2002). Age, growth and longevity of the gray triggerfish, Balistes capriscus (Tetraodontiformes: Balistidae), from the Southeastern Brazilian Coast. Scientia Marina, 66(2), 167–173. Retrieved from http://www.icm.csic.es/scimar/pdf/66/sm66n2167.pdf
Gray Triggerfish	Balistes capriscus	Burton, M. L., Potts, J. C., Carr, D. R., Cooper, M., & Lewis, J. (2015). Age, growth, and mortality of gray triggerfish (Balistes capriscus) from the southeastern United States. Fishery Bulletin, 113(1), 27–39. http://doi.org/10.7755/fb.113.1.3
Gray Triggerfish	Balistes capriscus	Farmer, N. A., Malinowski, R. P., McGovern, M. F., & Rubec, P. J. (2016). Stock complexes for fisheries management in the Gulf of Mexico. Marine and Coastal Fisheries, 8(1), 177–201. http://doi.org/10.1080/19425120.2015.1024359
Gray Triggerfish	Balistes capriscus	Fitzhugh, G. R., Lyon, H. M., & Barnett, B. K. (2015). Reproductive parameters of Gray Triggerfish (Balistes capriscus ) from the Gulf of Mexico : sex ratio , maturity and spawning fraction. Sedar 43 WP 03, 13.
Gray Triggerfish	Balistes capriscus	Hood, P. (2006). History of Vermilion Snapper, Greater Amberjack, and Gray Triggerfish Management in Federal Waters of the Us Gulf of Mexico- 1984-2005: SEDAR 9. NOAA Fisheries, St Petersburg, FL. Retrieved from http://sedarweb.org/docs/wpapers/S9DW01_Hist Mgmt.pdf
Gray Triggerfish	Balistes capriscus	Hood, P. B., & Johnson, A. K. (1997). A study of the age structure, gorwth, maturity schedules and fecundity of Gray Triggerfish (Balistes capriscus), red porgy (Pagrus pagrus), and vermilion snapper (Rhomboplites aurorubens) from the Eastern Gulf of Mexico. St. Petersburg, FL.
Gray Triggerfish	Balistes capriscus	Huntsman, G. R. (1976). Offshore headboat fishing in North Carolina and South Carolina. Mar. Fish. Rev, (1179), 13–23. Retrieved from http://fishingthecarolinacoast.com/uploads/70s_headboat_177.pdf
Gray Triggerfish	Balistes capriscus	Ingram, G. W. (2001). Stock structure of Gray Triggerfish, Balistes capriscus, on multiple spatial scales in the Gulf of Mexico. Ph.D. Dissertaion. University of South Alabama. Mobile, Alabama. Retrieved from http://sedarweb.org/docs/wsupp/S41_RD45_Ingram2001.pdf
Gray Triggerfish	Balistes capriscus	Johnson, A. G., & Saloman, C. H. (1984). Age, Growth, and Mortality of Gray Triggerfish, Balistes-Capriscus, from the Northeastern Gulf of Mexico. Fishery Bulletin, 82(3), 485–492. Retrieved from http://www.sefsc.noaa.gov/labs/panama/library/AJ84FB.pdf
Gray Triggerfish	Balistes capriscus	Kacem, H., & Neifar, L. (2014). The reproductive biology of the grey triggerfish Balistes capriscus ( Pisces : Balistidae ) in the Gulf of Gabe ( south-eastern Mediterranean Sea ). Journal of the Marine Biological Association of the United Kingdom, 94(7), 1531–1537. http://doi.org/10.1017/S0025315414000824
Gray Triggerfish	Balistes capriscus	Kacem, H., Boudaya, L., & Neifar, L. (2015). Age, growth and longevity of the grey triggerfish, Balistes capriscus Gmelin, 1789 (Teleostei, Balistidae) in the Gulf of Gabès, southern Tunisia, Mediterranean Sea. Journal of the Marine Biological Association of the United Kingdom, 95(5), 1061–1067. http://doi.org/10.1017/S0025315414002148
Gray Triggerfish	Balistes capriscus	Kelly, A. M. (2014). Age, growth, and reproduction of gray triggerfish Balistes capriscus off the southeastern US Atlantic coast. M.S. Thesis. The College of Charleston. Retrieved from http://gradworks.umi.com/15/55/1555874.html
Gray Triggerfish	Balistes capriscus	Lombardi, L. (2015). Gray Triggerfish Ageing Error. SEDAR, North Charleston, SC.
Gray Triggerfish	Balistes capriscus	MacKichan, C. A., & Szedlmayer, S. T. (2007). Reproductive behavior of the gray triggerfish, Balistes capriscus, in the northeastern Gulf of Mexico. Proceedings of the Gulf and Caribbean Fisheries Institute, 59(213–218). Retrieved from http://aquaticcommons.org/13182/1/gcfi_59-30.pdf
Gray Triggerfish	Balistes capriscus	Moore, D. (1967). Triggerfishes (Balistes) of the western Atlantic. Bulletin of Marine Science, (17), 689–722. Retrieved from http://www.ingentaconnect.com/content/umrsmas/bullmar/1967/00000017/00000003/art00011
Gray Triggerfish	Balistes capriscus	Noaa. (2005). Stock Assessment and Fishery Evaluation Report for the Snapper Grouper Fishery of the South Atlantic November 18, 2005. South Atlantic Fishery Management Council. Retrieved from http://sero.nmfs.noaa.gov/sustainable_fisheries/safe_reports/documents/pdfs/snapper_grouper_2005_safe.pdf
Gray Triggerfish	Balistes capriscus	Nowlis, J. S. (2005). Age-Based Analyses of the Gulf of Mexico Gray Triggerfish (Balistes capriscus) Stock. SEDAR 9-AW2-09. Southeast Fisheries Science Center, Miami, FL. Retrieved from http://sedarweb.org/docs/wpapers/S9AW09 GT ASPM rev.pdf
Gray Triggerfish	Balistes capriscus	Rudershausen, P. J., Williams, E. H., Buckel, J. A., Potts, J. C., & Manooch, C. S. (2008). Comparison of reef fish catch per unit effort and total mortality between the 1970s and 2005-2006 in Onslow Bay, North Carolina. Transactions of the American Fisheries Society, 137(5), 1389–1405. http://doi.org/10.1577/T07-159.1
Gray Triggerfish	Balistes capriscus	Schobernd, C. M., & Sedberry, G. R. (2009). Shelf-Edge and Upper-Slope Reef Fish Assemblages in the South Atlantic Bight: Habitat Characteristics, Spatial Variation, and Reproductive Behavior. Bulletin of Marine Science, 84(1), 67–92.
Gray Triggerfish	Balistes capriscus	Sedar. (2006). Sedar 9 Gulf of Mexico Gray Triggerfish (Vol. 29414). Sedar 9, Charleston, SC.
Gray Triggerfish	Balistes capriscus	SEDAR. (2013). SEDAR41-RD03 SEDAR 9 Update Stock Assessment Report: Gulf of Mexico Gray Triggerfish (December 2011). SEDAR. North Charleston, SC. Retrieved from http://sedarweb.org/docs/wsupp/S41_RD03_2011_GoM_GTF_S9Update.pdf
Gray Triggerfish	Balistes capriscus	SEDAR. (2015). SEDAR 43 Gulf of Mexico Gray Triggerfish Stock Assessment Report. SEDAR. North Charleston, SC. Retrieved from http://gulfcouncil.org/resources/SEDAR/SEDAR 43/SEDAR 43 FINAL.pdf
Gray Triggerfish	Balistes capriscus	Simmons, C. (2008). Gray Triggerfish, Balistes capriscus, reproductive behavior, early life history, and competitive interactions between Red Snapper, Lutjanus campechanus, in the northern Gulf of Mexico. Ph.D. Dissertation. Auburn University. Retrieved from http://www.ag.auburn.edu/fish/wp-content/uploads/formidable/Mackichan_Carrie_37.pdf
Gray Triggerfish	Balistes capriscus	Simmons, C. M., & Szedlmayer, S. T. (2011). Recruitment of age-0 Gray Trigerfish to benthic structured habitat in Northern Gulf of Mexico. Transactions of the American Fisheries Society, 140(1), 14–20. http://doi.org/10.1080/00028487.2011.545002
Gray Triggerfish	Balistes capriscus	Simmons, C. M., & Szedlmayer, S. T. (2012). Territoriality, reproductive behavior, and parental care in gray triggerfish, Balistes capriscus, from the Northern Gulf of Mexico. Bulletin of Marine Science, 88(2), 197–209. http://doi.org/10.5343/bms.2011.1012
Gray Triggerfish	Balistes capriscus	Valle, M., Legault, C. M., & Ortiz, M. (2001). A stock assessment for gray triggerfish, Balistes capriscus, in the Gulf of Mexico. Sustainable Fisheries Division, SFD 00/01(124), 1–50. Retrieved from http://sedarweb.org/docs/wsupp/S9RD11_GrayTrig01.pdf
Greater Amberjack	Seriola dumerili	Berry, F. H., & Burch, R. K. (1979). Aspects of the Amberjack Fisheries. Proceedings of the 31st Gulf and Caribbean Fisheries Institute, 179–194. Retrieved from http://aquaticcommons.org/12307/1/gcfi_31-23.pdf
Greater Amberjack	Seriola dumerili	Brown, C. A., Porch, C. E., & Scott, G. P. (2005). Gulf of Mexico greater amberjack virtual population assessment. SEDAR9-AW-10. Retrieved from http://sedarweb.org/docs/wpapers/S9aw10 GAJVPA.pdf
Greater Amberjack	Seriola dumerili	Burch, R. . (1979). The greater amberjack, Seriola dumerili: Its biology and fishery off Southeastern Florida. M.S.Thesis, RosenstieL School of Marine and Atmospheric Sciences. Miami, FL. Retrieved from https://books.google.com/books/about/The_Greater_Amberjack_Seriola_Dumerili.html?id=RK8HOAAACAAJ
Greater Amberjack	Seriola dumerili	Cummings, N. J., & McClellan, D. B. (1997). Status of the greater amberjack, Seriola dumerili, in the southeastern United States through 1995. Proceedings of the Gulf and Caribbean Fisheries Institute, 49, 246–272. Retrieved from http://aquaticcommons.org/12985/1/gcfi_49-19.pdf
Greater Amberjack	Seriola dumerili	Cummings, N. J., & Mcclellan, D. B. (2000). Trends in the Gulf of Mexico Greater Amberjack fishery through 1998: commercial landings, recreational catches, observed length frequencies, estimates of landed and discarded catch at age, and selectivity at age. Sedar33-RD11, North Charleston, SC.
Greater Amberjack	Seriola dumerili	Cummings, N. J., Turner, S. C., McClellan, D. B., & Legault, C. M. (1999). SEDAR 15- RD05, Atlantic greater amberjack abundance indices from commercial handline and recreational charter, private, and headboat fisheries trhough fishing year 1997. SEDAR. Miami, FL. Retrieved from http://sedarweb.org/docs/wsupp/SEDAR 15-RD05.pdf
Greater Amberjack	Seriola dumerili	Farmer, N. A., Malinowski, R. P., McGovern, M. F., & Rubec, P. J. (2016). Stock complexes for fisheries management in the Gulf of Mexico. Marine and Coastal Fisheries, 8(1), 177–201. http://doi.org/10.1080/19425120.2015.1024359
Greater Amberjack	Seriola dumerili	Gold, J. R., & Richardson, L. R. (1998). Population structure in greater amberjack, Seriola dumerili, from the Gulf of Mexico and the western Atlantic Ocean. Fishery Bulletin, 96(4), 767–778. Retrieved from http://fishbull.noaa.gov/964/gold.pdf
Greater Amberjack	Seriola dumerili	Gulak, S. J. B., & Carlson, J. K. (2013). Catch and bycatch of greater amberjack in the Gulf of MExico shark and reeffish bottom longline fishery based on observer data. SEDAR33-DW24. SEDAR. North Charleston, SC. Retrieved from http://sedarweb.org/docs/wpapers/SEDAR33-DW24- Gulak and Carlson 2013 Amberjack Catch Bycatch Longline Fishery.pdf
Greater Amberjack	Seriola dumerili	Harris, P. J., Wyanski, D. M., White, D. B., Mikell, P. P., & Eyo, P. B. (2007). Age, Growth, and Reproduction of Greater Amberjack off the Southeastern U.S. Atlantic Coast. Transactions of the American Fisheries Society, 136(6), 1534–1545. http://doi.org/10.1577/T06-113.1
Greater Amberjack	Seriola dumerili	Hood, P. (2006). History of Vermilion Snapper, Greater Amberjack, and Gray Triggerfish Management in Federal Waters of the Us Gulf of Mexico- 1984-2005: SEDAR 9. NOAA Fisheries, St Petersburg, FL. Retrieved from http://sedarweb.org/docs/wpapers/S9DW01_Hist Mgmt.pdf
Greater Amberjack	Seriola dumerili	Jerez, S., Samper, M., Santamaría, F. J., Villamandos, J. E., Cejas, J. R., & Felipe, B. C. (2006). Natural spawning of greater amberjack (Seriola dumerili) kept in captivity in the Canary Islands. Aquaculture, 252(2–4), 199–207. http://doi.org/10.1016/j.aquaculture.2005.06.031
Greater Amberjack	Seriola dumerili	Leonard, E. E. (2009). Comparative age and growth of greater amberjack (Seriola dumerili) from charterboat and headboat fisheries of west Florida and Alabama, Gulf of Mexico. M.S. Thesis. University of Florida. Retrieved from http://purl.fcla.edu/fcla/etd/UFE0025055
Greater Amberjack	Seriola dumerili	Manooch, C. S., & Potts, J. C. (1997). Age, growth and mortality of greater amberjack from the southeastern United States. Bulletin of Marine Science, 61(3), 671–683. http://doi.org/10.1016/s0165-7836(96)00554-1
Greater Amberjack	Seriola dumerili	McClellan, D. B., & Cummings, N. J. (1997). Preliminary analysis of tag and recapture data of the greater amberjack, Seriola dumerili, in the southeastern United States. Proceedings of the Gulf and Caribbean Fisheries Institute, 49, 25–45. Retrieved from http://sedarweb.org/docs/wsupp/S9RD3_TagCaptureGreaterAmberjack.pdf
Greater Amberjack	Seriola dumerili	Murie, D. J., & Parkyn, D. C. (2008). Age, growth and sex maturity of Greater Amberjack (Seriola dumerili) in the Gulf of Mexico.
Greater Amberjack	Seriola dumerili	Murie, D. J., & Parkyn, D. C. (2013). Age, Growth and Sex Maturity of Greater Amberjack (Seriola dumerili) in the Gulf of Mexico. SEDAR 33-RD13. SEDAR. North Charleston, SC. Retrieved from http://sedarweb.org/docs/wsupp/SEDAR33-RD13- Murie and Parkyn 2008 Age%2C Growth%2C and Maturity of GAJ in the GoM.pdf
Greater Amberjack	Seriola dumerili	Mylonas, C. C., Papandroulakis, N., Smboukis, A., Papadaki, M., & Divanach, P. (2004). Induction of spawning of cultured greater amberjack (Seriola dumerili) using GnRHa implants. Aquaculture, 237(1–4), 141. http://doi.org/10.1016/j.aquaculture.2004.04.015
Greater Amberjack	Seriola dumerili	Noaa. (2005). Stock Assessment and Fishery Evaluation Report for the Snapper Grouper Fishery of the South Atlantic November 18, 2005. South Atlantic Fishery Management Council. Retrieved from http://sero.nmfs.noaa.gov/sustainable_fisheries/safe_reports/documents/pdfs/snapper_grouper_2005_safe.pdf
Greater Amberjack	Seriola dumerili	Schirripa, M. J., & Burns, K. M. (1997). Growth estimates for three species of reef fish in the eastern Gulf of Mexico. Bulletin of Marine Science, 61(3), 581–591. Retrieved from http://www.ingentaconnect.com/content/umrsmas/bullmar/1997/00000061/00000003/art00010
Greater Amberjack	Seriola dumerili	SEDAR. (2005). SEDAR 9 SAR 2 Gulf of Mexico Greater Amberjack. SEDAR North Charleston, NC. Retrieved from http://sedarweb.org/docs/sar/SEDAR9_SAR2 GOM GreaterAmberjack.pdf
Greater Amberjack	Seriola dumerili	SEDAR. (2007). SEDAR 15-RD02 A Tag and Recapture study of greater amberjack, Seriola dumerili, from the Southeastern United States. MARMAP Report. Retrieved from http://sedarweb.org/docs/wsupp/SEDAR 15-RD02.pdf
Greater Amberjack	Seriola dumerili	SEDAR. (2008). SEDAR 15 Stock Assessment Report 2 (SAR 2) South Atlantic Greater Amberjack. SEDAR. North Charleston, SC. Retrieved from http://sedarweb.org/docs/sar/S15 SAR2 Greater Amberjack FINAL.pdf
Greater Amberjack	Seriola dumerili	SEDAR. (2014). SEDAR 33 Gulf of Mexico Greater Amberjack Stock Assessment Report. SEDAR. North Charleston, SC. Retrieved from http://www.sefsc.noaa.gov/sedar/Sedar_Workshops.jsp?WorkshopNum=33
Greater Amberjack	Seriola dumerili	Sedberry, G. R., Pashuk, O., Pashuk, O., Wyanski, D. M., Wyanski, D. M., Wyanski, D. M., … Stephen, J. A. (2006). Spawning locations for Atlantic reef fishes off the Southeastern U.S. Proc. of the 57th Gulf and Caribbean Fisheries Institute, 463–514. Retrieved from http://graysreef.noaa.gov/science/publications/pdfs/i-49.pdf
Greater Amberjack	Seriola dumerili	Sinopoli, M., D’Anna, G., Badalamenti, F., & Andaloro, F. (2007). FADs influence on settlement and dispersal of the young-of-the-year greater amberjack (Seriola dumerili). Marine Biology, 150(5), 985–991. http://doi.org/10.1007/s00227-006-0368-3
Greater Amberjack	Seriola dumerili	Thompson, B. A., Beasley, M., & Wilson, C. A. (1999). Age distribution and growth of greater amberjack, Seriola dumerili, from the north-central Gulf of Mexico. Fishery Bulletin, 97(2), 362–371. Retrieved from http://www.sidalc.net/cgi-bin/wxis.exe/?IsisScript=LIBRI.xis&amp;method=post&amp;formato=2&amp;cantidad=1&amp;expresion=mfn=007250
Greater Amberjack	Seriola dumerili	Thompson, B. A., Wilson, C. A., Render, J. H., Beasley, M., & Cauthron, C. (1992). Age, growth, and reproductive biology of greater amberjack and cobia from Louisiana waters. SEDAR 28-RD26. Coastal Fisheries Institute. Lousiana State University. Retrieved from http://sedarweb.org/docs/wsupp/SEDAR28-RD26 Thompson et al 1992.pdf
Greater Amberjack	Seriola dumerili	Turner, S. C. (2000). Catch rates of greater amberjack caught in the headboat fisheries in the Gulf of Mexico in 1986-1998. National Marine Fisheries Service, SFD99/00(107), 1–17. Retrieved from http://sedarweb.org/docs/wsupp/S9RD08_GAJheadboatGOM.pdf
Greater Amberjack	Seriola dumerili	Turner, S. C., Cummings, N. J., & Porch, C. E. (2000). Stock assessment of Gulf of Mexico greater amberjack using data through 1998. NMFS/SEFSC, SFD 99/00(100), 1–27. Retrieved from http://sedarweb.org/docs/wsupp/S9RD06_GAJassessGulf.pdf
Greater Amberjack	Seriola dumerili	Wells, R. J., & Rooker, J. R. (2004). Distribution, age, and growth of young-of-the year greater amberjack (Seriola dumerili) associated with pelagic Sargassum. Fishery Bulletin, 102, 545–554. Retrieved from http://aquaticcommons.org/15081/
Greater Amberjack	Seriola dumerili	Wildlife, L. D. of. (2016). Greater Amberjack FRONT with bleed with copyright. Retrieved from http://www.wlf.louisiana.gov/sites/default/files/pdf/document/37780-fisheries-brochures/greater_amberjack_front_.pdf
Hogfish	Lachnolaimus maximus	Ault, J. S., Bohnsack, J. A., & Meester, G. A. (1998). A retrospective (1979-1996) multispecies assessment of coral reef fish stocks in the Florida Keys. Fishery Bulletin, 96(3), 395–414.
Hogfish	Lachnolaimus maximus	Castro-Pérez, J. M., González, G., & Arias-González, J. E. (2011). Characterizing spatial and temporal reef fisheries in Chinchorro Bank Biosphere Reserve , northern Mesoamerican Reef System ( MAR ). Hidrobiológica, 21, 196–207. Retrieved from http://scielo.unam.mx/pdf/hbio/v21n2/v21n2a10.pdf
Hogfish	Lachnolaimus maximus	Claro, R., Garcia Cagide, A., & Fernandez de Alaiza, R. (1989). Caracteristicas biologicas del pez perro, Lachnolaimus maximus (Walbaum), en el golfo de Batabano, Cuba. Revista Investigaciones Marinas, 10, 239–252.
Hogfish	Lachnolaimus maximus	Colin, P. L. (1982). Spawning and larval development of the hogfish, Lachnolaimus maximus (Pisces: Labridae). US Fishery Bulletin, 80(4), 853–862. Retrieved from http://agris.fao.org/agris-search/search.do?recordID=US8274401
Hogfish	Lachnolaimus maximus	Collins, A. B., & McBride, R. S. (2011). Demographics by depth: Spatially explicit life-history dynamics of a protogynous reef fish. Fishery Bulletin, 109(2), 232–242. Retrieved from http://aquaticcommons.org/8719/
Hogfish	Lachnolaimus maximus	Collins, A., & McBride. (2008). Integrating life history, mating system, fishing effects, and habitat of hogfish, Lachnolaimus maximus, a harem spawning fish in the southesast US. St. Petersburg, FL.
Hogfish	Lachnolaimus maximus	Cooper, W., Collins, A., O’hop, J., & Addis, D. (2013). The 2013 Stock Assessment Report for Hogfish in the South Atlantic and Gulf of Mexico. Florida Fish and Wildlife Conservation Commission. St. Petersburg, FL. Retrieved from http://sedarweb.org/docs/sar/SEDAR37_Hogfish_SAR.pdf
Hogfish	Lachnolaimus maximus	Davis, J. C. (1976). Biology of the Hogfish, Lachnolaimus maximus (Walbaum), in the Florida Keys (M.S. Thesi). University of Miami, Coral Gables. Retrieved from https://scholar.googleusercontent.com/scholar.bib?q=info:b1JbFB2jY4AJ:scholar.google.com/&output=citation&scisig=AAGBfm0AAAAAV7RrAJV7ECw_0kawoOVco6zv7YPMJCLL&scisf=4&ct=citation&cd=-1&hl=en
Hogfish	Lachnolaimus maximus	Farmer, N. A., Malinowski, R. P., McGovern, M. F., & Rubec, P. J. (2016). Stock complexes for fisheries management in the Gulf of Mexico. Marine and Coastal Fisheries, 8(1), 177–201. http://doi.org/10.1080/19425120.2015.1024359
Hogfish	Lachnolaimus maximus	Heyman, W. D., & Kjerfve, B. (2008). Characterization of Transient Multi Species Reef Fish Spawning Aggregations At Gladden Spit , Belize. Bulletin of Marine Science, 83(3), 531–551. Retrieved from http://www.ingentaconnect.com/content/umrsmas/bullmar/2008/00000083/00000003/art00006
Hogfish	Lachnolaimus maximus	Lindholm, J., Knight, A., Kaufman, L., & Miller, S. (2006). A Pilot Study of Hogfish ( Lachnolaimus maximus Walbaum 1792 ) Movement in the Conch Reef Research Only Area ( Northern Florida Keys ). Marine Sanctuaries Conservation Series NMSP-06-06., (August), 14.
Hogfish	Lachnolaimus maximus	Mcbride, R. S. (2001). Age, growth and reproduction of hogfish, (Lachnolaimus maximus). St. Petersburg, FL.
Hogfish	Lachnolaimus maximus	Mcbride, R. S., & Johnson, M. R. (2007). Sexual development and reproductive seasonality of hogfish (Labridae: Lachnolaimus maximus), an hermaphroditic reef fish. Journal of Fish Biology, 71(5), 1270–1292. http://doi.org/10.1111/j.1095-8649.2007.01580.x
Hogfish	Lachnolaimus maximus	Mcbride, R. S., & Richardson, A. K. (2007). Evidence of size-selective fishing mortality form an age and growth study of hogfish (Labridae: Lachnolaimus maximus), a hermaphroditic reef fish. Bulletin of Marine Science, 80(2), 401–417. Retrieved from http://www.ingentaconnect.com/contentone/umrsmas/bullmar/2007/00000080/00000002/art00009
Hogfish	Lachnolaimus maximus	Mcbride, R. S., Thurman, P. E., & Bullock, L. H. (2008). Regional Variations of Hogfish (Lachnolaimus maximus) Life History: Consequences for Spawning Biomass and Egg Production Models. Journal of Northwest Atlantic Fishery Science, 41, 1–12. http://doi.org/10.2960/j.v41.m609
Hogfish	Lachnolaimus maximus	McBride, R., Johnson, M., & Bullock, L. (2001). Preliminary observations on the sexual development of hogfish, Lachnolaimus maximus (Pisces: Labridae). Proceedings of the Gulf and Caribbean Fisheries Institute, 52, 98–134. Retrieved from http://nsgl.gso.uri.edu/flsgp/flsgpw99004/flsgpw99004_part3.pdf
Hogfish	Lachnolaimus maximus	Muñoz, R. C., Burton, M. L., & Brennan, K. J. (2010). Reproduction, habitat utilization, and movements of hogfish (Lachnolaimus maximus) in the Florida Keys, USA: comparisons from fished versus unfished habitats. Bulletin of Marine Science, 86(1), 93–116. Retrieved from http://www.ingentaconnect.com/content/umrsmas/bullmar/2010/00000086/00000001/art00007
Hogfish	Lachnolaimus maximus	SEDAR. (2004). SEDAR 6 Complete Stock Assessment Report of Hogfish Snapper. SEDAR. North Charleston, SC. Retrieved from http://sedarweb.org/docs/sar/SEDAR6_SAR2_hogfishall.pdf
Hogfish	Lachnolaimus maximus	SEDAR. (2015). Review of SEDAR 37 - Hogfish. Gulf of Mexico Fishery Management Council. Tampa, FL. Retrieved from http://sedarweb.org/docs/postsedar/Gulf SSC Review of SEDAR 37 - Hogfish.pdf
King Mackerel	Scomberomorus cavalla	Arreguín-sánchez, F., Cabrera, M. A., & Aguilar, F. A. (1995). Population dynamics of the king mackerel (Scomberomorus cavalla) of the Campeche Bank, Mexico. Scientia Marina, 59(3–4), 637–645. Retrieved from http://dialnet.unirioja.es/servlet/articulo?codigo=2188711&amp;orden=0&amp;info=link
King Mackerel	Scomberomorus cavalla	Beaumariage, D. S. (1973). Age, growth, and reproduction of king mackerel, Scomberomorus cavalla, in Florida. Florida Marine Research Publications, (1), 1–44. Retrieved from http://agris.fao.org/agris-search/search.do?recordID=US201300518782
King Mackerel	Scomberomorus cavalla	Broughton, R. E., Stewart, L. B., & Gold, J. R. (2002). Microsatellite variation suggests substantial gene flow between king mackerel (Scomberomorus cavalla) in the western Atlantic Ocean and Gulf of Mexico. Fisheries Research, 54(3), 305. http://doi.org/10.1016/s0165-7836(01)00275-2
King Mackerel	Scomberomorus cavalla	Chavez, E. A., & Arregun-Sanchez, F. (1995). Optimizing yields of the king mackerel (Scomberomorus cavalla) fishery in the western and southern Gulf-of-Mexico. Scientia Marina, 59(3–4), 629–636. Retrieved from http://sedarweb.org/docs/wsupp/SEDAR16_RD_06.pdf
King Mackerel	Scomberomorus cavalla	Clardy, T. R., Patterson, W. F., DeVries, D. A., & Palmer, C. (2008). Spatial and temporal variability in the relative contribution of king mackerel (Scomberomorus cavalla) stocks to winter mixed fisheries off South Florida. Fishery Bulletin, 106(2), 152–160. Retrieved from http://aquaticcommons.org/8848/
King Mackerel	Scomberomorus cavalla	Collins, M. R., & Stender, B. W. (1987). Larval king mackerel ( Scomberomorus cavalla), Spanish mackerel (S. maculatus), and bluefish ( Pomatomus saltatrix) off the southeast coast of the United States, 1973-1980. Bulletin of Marine Science, 41(3), 822–834. http://doi.org/10.1017/CBO9781107415324.004
King Mackerel	Scomberomorus cavalla	Collins, M. R., Schmidt, D. J., Waltz, C. W., & Pickney, J. L. (1989). Age and growth of king mackerel, Scomberomorus cavalla, from the Atlantic coast of the United States. Fishery Bulletin, 87(1), 49–61. Retrieved from http://scholarcommons.sc.edu/biol_facpub/53/
King Mackerel	Scomberomorus cavalla	de L Strum, M. G., & Salter, P. (1989). Age, growth, and reproduction of the King Mackerel Scomberomorus cavalla (Cuvier) in Trinidad waters. Fishery Bulletin, 88(1), 361–370. Retrieved from http://fishbull.noaa.gov/882/sturm.pdf
King Mackerel	Scomberomorus cavalla	De Vries, D. A., Grimes, C. B., Lang, K. L., & White, B. D. W. (1990). Age and growth of king and Spanish mackerel larvae and juveniles from the Gulf of Mexico and U.S. South Atlantic Bight. Environmental Biology of Fishes, 29(2), 135–143. http://doi.org/10.1007/BF00005030
King Mackerel	Scomberomorus cavalla	Devries, D. A., & Grimes, C. B. (1997). Spatial and temporal variation in age and growth of king mackerel ,. Fishery Bulletin, 95, 694–708. Retrieved from http://fishbull.noaa.gov/954/devries.pdf
King Mackerel	Scomberomorus cavalla	DeVries, D. A., Grimes, C. B., & Prager, M. H. (2002). Using otolith shape analysis to distinguish eastern Gulf of Mexico and Atlantic Ocean stocks of king mackerel. Fisheries Research, 57(1), 51–62. http://doi.org/10.1016/S0165-7836(01)00332-0
King Mackerel	Scomberomorus cavalla	Fable Jr., W. A., Trent, L., Bane, G. W., & Ellsworth, S. W. (1987). Movements of king mackerel, Scomberomorus cavalla, tagged in southeast Louisiana, 1983-85. Marine Fisheries Review, 49(2), 98–101. Retrieved from http://www.sefsc.noaa.gov/labs/panama/library/WF87MFR.pdf
King Mackerel	Scomberomorus cavalla	Finucane, J. H., Collins, L. A., & Brusher, H. A. (1986). Reproductive Biowgy of King Mackerel, Scomberomorus Cavalla, From the Southeastern United States. Fishery Bulletin, 84(4), 841–850. Retrieved from http://fishbull.noaa.gov/844/finucane.pdf
King Mackerel	Scomberomorus cavalla	Fitzhugh, G., Fioramonti, C., Walling, W., Gamby, M., Lyon, H., Devries, D. A., & Ortiz, M. (2008). Batch fecundity and an attempt to estimate spawning frequency of king mackerel (Scomberomorus cavalla) in U.S. waters. Proceedings of the Gulf and Caribbean Fisheries Institute, 61, 30–37. Retrieved from http://aquaticcommons.org/15694/1/GCFI_61-5.pdf
King Mackerel	Scomberomorus cavalla	Gledhill, C. T., & Lyczkowski-Shultz, J. (2000). Indices of larval king mackerel (Scomberomorus cavalla) abundance in the Gulf of Mexico for use in population assessments. Fishery Bulletin, 98(4), 684–691. Retrieved from //www.researchgate.net/publication/242472363_Indices_of_larval_king_mackerel_Scomberomorus_cavalla_abundance_in_the_Gulf_of_Mexico_for_use_in_population_assessments
King Mackerel	Scomberomorus cavalla	Godcharles, M. F., & Murphy, M. D. (1986). Species Profiles. Life Histories and Environmental Requirements of Coastal Fishes and Invertebrates (South Florida). King Mackerel and Spanish Mackerel. U.S. Fish Wildl. Serv. Biol. Rep., 82, 18. Retrieved from http://oai.dtic.mil/oai/oai?verb=getRecord&amp;metadataPrefix=html&amp;identifier=ADA173749
King Mackerel	Scomberomorus cavalla	Grimes, C. B., Finucane, J. H., Collins, L. A., & Devries, D. A. (1990). Young king mackerel, Scomberomorus cavalla, in the Gulf of Mexico, a summary of the distribution and occurrence of larvae and juveniles, and spawning dates for Mexican juveniles. Bulletin of Marine Science, 46(3), 640–654. Retrieved from http://www.ingentaconnect.com/content/umrsmas/bullmar/1990/00000046/00000003/art00005
King Mackerel	Scomberomorus cavalla	Johnson, A. G., Fable, A., J., Williams, M. L., & Barger, L. E. (1983). Age, growth, and mortality of king mackerel, Scomberomorus cavalla , from the southeastern United States. Fishery Bulletin, 81(1), 97–106. Retrieved from http://www.sefsc.noaa.gov/labs/panama/library/AJ83FB.pdf
King Mackerel	Scomberomorus cavalla	Johnson, A. G., Fable, W. A., Grimes, C. B., & Trent, L. (1994). Evidence for distinct stocks of king mackerel, Scomberomorus cavalla, in the Gulf of Mexico. Fishery Bulletin, 92(1), 91. Retrieved from http://fishbull.noaa.gov/921/johnson.pdf
King Mackerel	Scomberomorus cavalla	MacGregor III, R., Dindo, J. J., & Finucane, J. H. (1981). Changes in serum androgens and estrogens during spawning in bluefish, Pomatomus saltator , and king mackerel, Scomberomorus cavalla. Canadian Journal of Zoology, 59(9), 1749. http://doi.org/10.1139/z81-240
King Mackerel	Scomberomorus cavalla	Manooch III, C. S. (1978). Recreational and commercial fisheries for king mackerel, Scomberomorus cavalla, in the South Atlantic Bight and Gulf of Mexico, U.S.A. Retrieved from https://repositories.tdl.org/tamug-ir/handle/1969.3/20238
King Mackerel	Scomberomorus cavalla	Manooch, C. S., Naughton, S. P., Grimes, C. B., & Trent, L. (1987). Age and Growth of King Mackerel , Scomberomorus cavalla , From the U . S . Gulf of Mexico. Marine Fisheries Review, 49, 102–108. Retrieved from http://spo.nmfs.noaa.gov/mfr492/mfr49212.pdf
King Mackerel	Scomberomorus cavalla	McEachran, J. D., Finucane, J. H., & Hall, L. S. (1980). Distribution, seasonality and abundance of king and Spanish mackerel larvae in the Northwestern Gulf of Mexico (Pisces: Scombridae). Northeast Gulf Science, 4(1), 1–16.
King Mackerel	Scomberomorus cavalla	Ortiz, M., & Phares, P. (2002). Stadardized catch rates of king mackerel (Scomberomorus cavalla) from U.S. Gulf of Mexico and South Atlantic recreational fisheries. U.S. Department of Commerce. Miami, FL. Retrieved from //www.researchgate.net/publication/267400441_STANDARDIZED_CATCH_RATES_OF_KING_MACKEREL_Scomberomorus_cavalla_FROM_US_GULF_OF_MEXICO_AND_SOUTH_ATLANTIC_RECREATIONAL_FISHERIES
King Mackerel	Scomberomorus cavalla	Roelke, L. A., & Cifuentes, L. A. (1997). Use of stable isotopes to assess groups of king mackerel, Scomberomoros cavalla, in the Gulf of Mexico and southeastern Florida. Fishery Bulletin, 95(3), 540–551. Retrieved from http://fishbull.noaa.gov/953/roelke.pdf
King Mackerel	Scomberomorus cavalla	Schaefer, H., & Fable, W. (1994). King mackerel, Scomberomorus cavalla, mark-recapture studies off Florida’s east coast. Marine Fisheries Review, 56(3), 13–23.
King Mackerel	Scomberomorus cavalla	SEDAR. (2004). SEDAR 5 Atlantic and Gulf of Mexico King Mackerel. Charleston, SC. Retrieved from http://sedarweb.org/docs/sar/S5_SAR1_complete.pdf
King Mackerel	Scomberomorus cavalla	SEDAR. (2009). SEDAR 16 Stock Assessment Report South Atlantic and Gulf of Mexico King Mackerel. SEDAR. North Charleston, SC. Retrieved from http://sedarweb.org/docs/sar/SEDAR16_final_SAR.pdf
King Mackerel	Scomberomorus cavalla	SEDAR. (2014). SEDAR 38 Gulf of Mexico King Mackerel Stock Assessment Report. SEDAR. North Charleston, SC. Retrieved from http://sedarweb.org/docs/sar/SEDAR_38_Gulf_SAR.pdf
King Mackerel	Scomberomorus cavalla	Shepard, K. E., Patterson, W. F., DeVries, D. A., & Ortiz, M. (2010). Contemporary versus historical estimates of King mackerel (Scomberomorus cavalla) age and growth in the U.S. Atlantic Ocean and Gulf of Mexico. Bulletin of Marine Science, 86(3), 515–532.
King Mackerel	Scomberomorus cavalla	Sturm, M. G. D. L., & Salter, P. (1990). Age, growth, and reproduction of the king mackerel Scomberomorus cavalla (Cuvier) in Trinidad waters. Fishery Bulletin, 88(2), 361–370. http://doi.org/10.1017/CBO9781107415324.004
King Mackerel	Scomberomorus cavalla	Sutter, F. C., Williams, R. O., & Godcharles, M. F. (1991). Growth and Mortality of King Mackerel Scomberomorus-Cavalla Tagged in the Southeastern United-States. Fishery Bulletin, 89(4), 733–737. Retrieved from http://fishbull.noaa.gov/894/sutter.pdf
King Mackerel	Scomberomorus cavalla	Trent, L., Fable, W. A., Russell, S. J., Bane, G. W., & Palko, B. J. (1987). Variations in Size and Sex-Ratio of King Mackerel, Scomberomorus Cavalla, Off Louisiana, 1977-85. Marine Fisheries Review, 49(2), 91–97. Retrieved from http://spo.nmfs.noaa.gov/mfr492/mfr49210.pdf
King Mackerel	Scomberomorus cavalla	Trent, L., Williams, R. O., Taylor, R. G., Saloman, C. H., & Manooch, III, C. H. (1983). Size, sex ratio, and recruitment in the various fisheries of king mackerel, Scomberomorus cavalla , in the southeastern United States. Fishery Bulletin, 81(4), 709–721. Retrieved from http://www.sefsc.noaa.gov/labs/panama/library/LT83FB.pdf
Mutton Snapper	Lutjanus analis	Bell, M. C., & Velzian, R. (2007). SEDAR 14 Stock Assessment Review: Caribbean Yellowfin Grouper, Mutton Snapper, and Queen Conch. North Charleston, NC. Retrieved from http://sedarweb.org/docs/sar/S14SAR1 Yellowfin Report.pdf
Mutton Snapper	Lutjanus analis	Bortone, S. A., & Williams, J. L. (1986). Species Profiles: Life Histories and Environmental Requirements of Coastal Fishes and Invertebrates (South Florida): Gray, Lane, Mutton and Yellowtail Snappers. U.S. Fish Wildl. Serv. Biol. Rep., (82), 1–18. Retrieved from http://oai.dtic.mil/oai/oai?verb=getRecord&amp;metadataPrefix=html&amp;identifier=ADA173781
Mutton Snapper	Lutjanus analis	Burton, M. L. (2002). Age, growth and mortality of mutton snapper, Lutjanus analis, from the east coast of Florida, with a brief discussion of management implications. Fisheries Research, 59, 31–41. Retrieved from http://www.sciencedirect.com/science/article/pii/S0165783602000073
Mutton Snapper	Lutjanus analis	Burton, M. L., Brennan, K. J., Muñoz, R. C., & Parker Jr, R. O. (2005). Preliminary evidence of increased spawning aggregations of mutton snapper (Lutjanus analis) at Riley’s Hump two years after establishment of the Tortugas South Ecological Reserve. Fishery Bulletin, 103, 404–410. Retrieved from http://aquaticcommons.org/9624/
Mutton Snapper	Lutjanus analis	Claro, R. (1981). Ecologia y ciclo de vida del pargo criollo, Lutjanus analis, en la plataforma cubana. Academia de Ciencias de Cuba, 186, 1–83.
Mutton Snapper	Lutjanus analis	Claro, R., & Lindeman, K. C. (2003). Spawning aggregation sites of snapper and grouper species (Lutjanidae and Serranidae) on the insular shelf of Cuba. Gulf and Caribbean Research, 14(2), 91–106. http://doi.org/10.18785/gcr.1402.07
Mutton Snapper	Lutjanus analis	Claro, R., Mitcheson, Y. S. de, Lindeman, K. C., & García-Cagide, A. R. (2009). Historical analysis of Cuban commercial fishing effort and the effects of management interventions on important reef fishes from 1960-2005. Fisheries Research, 99(1), 7–16. http://doi.org/10.1016/j.fishres.2009.04.004
Mutton Snapper	Lutjanus analis	Conn, P., Shertzer, K., Williams, E., & Carolina, N. (2007). Sedar15-Aw01. Sedar, North Charleston, SC.
Mutton Snapper	Lutjanus analis	Farmer, N. A., Malinowski, R. P., McGovern, M. F., & Rubec, P. J. (2016). Stock complexes for fisheries management in the Gulf of Mexico. Marine and Coastal Fisheries, 8(1), 177–201. http://doi.org/10.1080/19425120.2015.1024359
Mutton Snapper	Lutjanus analis	Faunce, C., & Muller, R. (2008). Mortality estimates for Mutton snapper, Lutjanus analis inhabiting Florida waters SEDAR 15. Sedar 15A - DW16, (1), 1–18.
Mutton Snapper	Lutjanus analis	Faunce, C., Tunnell, J., Burton, M., Ferguson, K., Hop, J. O., Muller, R., … Burton, M. (2007). Life history of Lutjanus analis inhabiting Florida waters. Sedar 15A - DW15, (Scrfa).
Mutton Snapper	Lutjanus analis	Freitas, M. O., de Moura, R. L., Francini-Filho, R. B., & Minte-Vera, C. V. (2011). Spawning patterns of commercially important reef fish (Lutjanidae and Serranidae) in the tropical western South Atlantic. Scientia Marina, 75(1), 135–146. http://doi.org/10.3989/scimar.2011.75n1135
Mutton Snapper	Lutjanus analis	Graham, R. T., Carcamo, R., Rhodes, K. L., Roberts, C. M., & Requena, N. (2008). Historical and contemporary evidence of a mutton snapper (Lutjanus analis Cuvier, 1828) spawning aggregation fishery in decline. Coral Reefs, 27(2), 311–319. http://doi.org/10.1007/s00338-007-0329-4
Mutton Snapper	Lutjanus analis	Heyman, W. D., & Kjerfve, B. (2008). Characterization of Transient Multi Species Reef Fish Spawning Aggregations At Gladden Spit , Belize. Bulletin of Marine Science, 83(3), 531–551. Retrieved from http://www.ingentaconnect.com/content/umrsmas/bullmar/2008/00000083/00000003/art00006
Mutton Snapper	Lutjanus analis	Kojis, B. L., & Quinn, N. J. (2009). Investigation of the spawning aggregation of mutton snapper,. St. Thomas, USVI: Tropical Discoveries Fund.
Mutton Snapper	Lutjanus analis	Kojis, B. L., & Quinn, N. J. (2010). Validation of a mutton snapper(Lutjanus analis) spawning aggregation in the Mutton Snapper Seasonal Closed Area, St Croix, US Virgin Islands. Proceedings of the Gulf and Caribbean Fisheries Institute, 62, 267–272. Retrieved from http://nsgl.gso.uri.edu/flsgp/flsgpc09001/data/papers/038.pdf
Mutton Snapper	Lutjanus analis	Mason, D. L., & Manooch, C. S. (1985). Age and growth of mutton snapper along the east coast of Florida. Fisheries Research, 3, 93. http://doi.org/10.1016/0165-7836(85)90012-8
Mutton Snapper	Lutjanus analis	O’hop, J., Muller, R. G., & Addis, D. T. (2015). Assessment of Mutton Snapper (Lutjanus analis) of the U.S. South Atlantic and Gulf of Mexico through 2013. SEDAR Update Assessment. SEDAR. Florida Fish and Wildlife Conservation Commission. St. Petersburg, FL. Retrieved from http://sedarweb.org/docs/suar/SEDAR Update Stock Assessment of Mutton Snapper 2015_FINAL.pdf
Mutton Snapper	Lutjanus analis	SEDAR. (2008). SEDAR 15A Stock Assessment Report 3 (SAR 3) South Atlantic and Gulf of Mexico Mutton Snapper. SEDAR. North Charleston, SC. Retrieved from http://www.safmc.net/Portals/6/Meetings/Council/BriefingBook/Jun08/SSC/A41_MSAssmt.pdf
Mutton Snapper	Lutjanus analis	Teixeira, S. F., Duarte, Y. F., & Ferreira, B. P. (2010). Reproduction of the fish Lutjanus analis (mutton snapper; Perciformes: Lutjanidae) from Northeastern Brazil. Revista de Biología Tropical, 58(3), 791–800. http://doi.org/10.15517/rbt.v58i2.5246
Nassau Grouper	Epinephelus striatus	Aguilar-Perera, A. (1994). Preliminary observations of the spawning aggregation of Nassau grouper, Epinephelus striatus, at Mahahual, Quintana Roo, Mexico. Proceedings of the 43rd Gulf and Caribbean Fisheries Institute, 43, 112–122. Retrieved from http://aquaticcommons.org/14880/1/Aguilar Perera.PDF
Nassau Grouper	Epinephelus striatus	Aguilar-Perera, A. (2006). Disappearance of a Nassau grouper spawning aggregation off the southern Mexican Caribbean coast. Marine Ecology Progress Series, 327(1), 289–296. Retrieved from http://www.int-res.com/articles/meps2007/327/m327p289.pdf
Nassau Grouper	Epinephelus striatus	Aguilar-Perera, A., & Aguilar-Dávila, W. (1996). A spawning aggregation of Nassau grouper Epinephelus striatus (Pisces: Serranidae) in the Mexican Caribbean. Environmental Biology of Fishes, 45(4), 351. Retrieved from http://academic.uprm.edu/~mvpizzini/MVP/HTMLobj-217/Aguilar-PereraandAguilar-Davila_1996.pdf
Nassau Grouper	Epinephelus striatus	Aguilar-Perera, A., González-Salas, C., & Villegas-Hernández, H. (2009). Fishing, management, and conservation of the Nassau Grouper, Epinephelus striatus, in the Mexican Caribbean. Proceedings of the 61st Gulf & Caribbean Fisheries Institute, 61, 313–319. Retrieved from http://nsgl.gso.uri.edu/flsgp/flsgpw08001/data/papers/045.pdf
Nassau Grouper	Epinephelus striatus	Archer, S. K., Heppell, S. A., Semmens, B. X., Pattengill-Semmens, C. V., Bush, P. G., Mccoy, C. M., & Johnson, B. C. (2012). Patterns of color phase indicate spawn timing at a Nassau grouper (Epinephelus striatus) spawning aggregation. Current Zoology, 58(1), 73–83. Retrieved from http://www.reef.org/reef_files/currentzoology_NGcolorphase_0112.pdf
Nassau Grouper	Epinephelus striatus	Bolden, S. K. (2000). Long-distance movement of a Nassau grouper (Epinephelus striatus) to a spawning aggregation in the central Bahamas. Fishery Bulletin, (98), 642–645. Retrieved from http://fishbull.noaa.gov/983/12.pdf
Nassau Grouper	Epinephelus striatus	Burnett-Herkes, J. (1975). Contribution to the biology of the red hind, Epinephelus guttatus, a commercially important serranid fish from the tropical western Atlantic. PhD dissertation, University of Miami, Coral Gables.
Nassau Grouper	Epinephelus striatus	Bush, P. G., Ebanks, G. C., & Lane, E. D. (1996). Validation of the ageing technique for the Nassau grouper (Epinephelus striatus) in the Cayman Islands. In F. Arreguin-Sanchez, J. L. Munro, M. C. Balgos, & D. Pauly (Eds.), Biology, fisheries and culture of tropical groupers and snappers1 (pp. 150–158). ICLARM.
Nassau Grouper	Epinephelus striatus	Bush, P. G., Lane, E. D., & Ebanks, G. C. (2004). The Nassau grouper spawning aggregation fishery of the Cayman Islands: An historical and management perspective. Proceedings of the Gulf and Caribbean Fisheries Institute, 57, 515–524. Retrieved from http://aquaticcommons.org/13887/1/gcfi_57-35.pdf
Nassau Grouper	Epinephelus striatus	Carter, J., Marrow, G. J., & Pryor, V. (1994). Aspects of the ecology and reproduction of Nassau grouper, Epinephelus striatus, off the coast of Belize, Central America. Proceedings of the Gulf and Caribbean Fisheries Institute, 43, 65–111. Retrieved from http://core.ac.uk/download/pdf/19442752.pdf
Nassau Grouper	Epinephelus striatus	Claro, R., & Lindeman, K. C. (2003). Spawning aggregation sites of snapper and grouper species (Lutjanidae and Serranidae) on the insular shelf of Cuba. Gulf and Caribbean Research, 14(2), 91–106. http://doi.org/10.18785/gcr.1402.07
Nassau Grouper	Epinephelus striatus	Claro, R., Garcia Cagide, A., Sierra, L., & Garcia Arteaga, J. (1990). Fisheries biology of the nassau grouper, Epinephelus striatus (Bloch) (Pisces: Serranidae) in the Cuban shelf. Ciencias Biologicas. Retrieved from http://agris.fao.org/agris-search/search.do?recordID=CU19940091387
Nassau Grouper	Epinephelus striatus	Claro, R., Mitcheson, Y. S. de, Lindeman, K. C., & García-Cagide, A. R. (2009). Historical analysis of Cuban commercial fishing effort and the effects of management interventions on important reef fishes from 1960-2005. Fisheries Research, 99(1), 7–16. http://doi.org/10.1016/j.fishres.2009.04.004
Nassau Grouper	Epinephelus striatus	Coleman, F. C., Koenig, C. C., & Collins, L. A. (1996). Reproductive styles of shallow-water groupers (Pisces: Serranidae) in the eastern Gulf of Mexico and the consequences of fishing spawning aggregations. Environmental Biology of Fishes, 47(47), 129–141. http://doi.org/10.1007/BF00005035
Nassau Grouper	Epinephelus striatus	Coleman, F. C., Koenig, C. C., Huntsman, G. R., Musick, J. A., Eklund, A.-M., McGovern, J. C., … Grimes, C. B. (2000). Long-lived reef fishes: the grouper-snapper complex. Fisheries, 25(3), 14–21. http://doi.org/10.1577/1548-8446(2000)025<0014
Nassau Grouper	Epinephelus striatus	Colin, P. L. (1992). Reproduction of the Nassau grouper, Epinephelus striatus (Pisces: Serranidae) and its relationship to environmental conditions. Environmental Biology of Fishes, 34(4), 357–377. http://doi.org/10.1007/BF00004740
Nassau Grouper	Epinephelus striatus	Colin, P. L., Laroche, W. A., & Brothers, E. B. (1997). Ingress and settlement in the Nassau grouper, Epinephelus striatus (Pisces: Serranidae), with relationship to spawning occurrence. Bulletin of Marine Science, 60(3), 656–667. Retrieved from http://www.ingentaconnect.com/content/umrsmas/bullmar/1997/00000060/00000003/art00004
Nassau Grouper	Epinephelus striatus	Colin, P. L., Shapiro, D. Y., & Weiler, D. (1987). Aspects of the Reproduction of Two Groupers , West Indies. Bulletin of Marine Science, 40(2), 220–230. Retrieved from http://www.ingentaconnect.com/content/umrsmas/bullmar/1987/00000040/00000002/art00005?crawler=true
Nassau Grouper	Epinephelus striatus	Cushion, N., Cook, M., & Schull, J. (2008). Reproductive classification and spawning seasonality of Epinephelus striatus (Nassau grouper), E . guttatus (red hind) and Mycteroperca venenosa (yellowfin grouper) from the Bahamas. Proceedings of the 11th International Coral Reef Symposium, Ft. Lauderdale, Florida, (November 2015), 994–998. Retrieved from //www.researchgate.net/publication/266488711_R…
Nassau Grouper	Epinephelus striatus	Eggleston, D. B. (1995). Recruitment in Nassau grouper Epinephelus striatus: post-settlement abundance, microhabitat features, and ontogenetic habitat shifts. Marine Ecology Progress Series, 124, 9–22. http://doi.org/10.3750/aip2014.44.2.05
Nassau Grouper	Epinephelus striatus	Farmer, N. A., Malinowski, R. P., McGovern, M. F., & Rubec, P. J. (2016). Stock complexes for fisheries management in the Gulf of Mexico. Marine and Coastal Fisheries, 8(1), 177–201. http://doi.org/10.1080/19425120.2015.1024359
Nassau Grouper	Epinephelus striatus	Heppell, S. A., & Semmens, B. X. (2008). Tracking potential larval dispersal patterns from Nassau grouper aggregation sites: Evidence for local retention and the “importance of place.” Proceedings of the Gulf and Caribbean Fisheries Institute, 61(325–32). Retrieved from http://nsgl.gso.uri.edu/flsgp/flsgpw08001/data/papers/048.pdf
Nassau Grouper	Epinephelus striatus	Heyman WD (2001) Spawning aggregations in Belize: towards a sustainable management of Nassau Groupers in Belize. The Nature Conservancy. 1-5
Nassau Grouper	Epinephelus striatus	Heyman, W., & Requena, N. (2002). Status of multi-species spawning aggregations in Belize. The Nature Conservancy. Punta Gorda, Belize. Retrieved from http://www.tflats.com/app/webroot/userfiles/66/nausau grouper aggregation sites.pdf
Nassau Grouper	Epinephelus striatus	Hill, R., & NMFS. (n.d.). Nassau Grouper (Bloch 1792), A Biological Report. Retrieved from http://sero.nmfs.noaa.gov/protected_resources/listing_petitions/documents/biological_report.pdf
Nassau Grouper	Epinephelus striatus	Jackson, A. M., Semmens, B. X., De Mitcheson, Y. S., Nemeth, R. S., Heppell, S. A., Bush, P. G., … Bernardi, G. (2014). Population structure and phylogeography in Nassau grouper (Epinephelus striatus), a mass-aggregating marine fish. PLoS ONE, 9(5), e97508. http://doi.org/10.1371/journal.pone.0097508
Nassau Grouper	Epinephelus striatus	Jory, D. E., & Iversen, E. S. (1989). Species profiles: Life histories and environmental requirements of coastal fishes and invertebrates (South Florida): Black, red and Nassau groupers. U.S. Fish Wildl. Serv. Biol. Rep., 82(11), 21. Retrieved from http://oai.dtic.mil/oai/oai?verb=getRecord&amp;metadataPrefix=html&amp;identifier=ADA214299
Nassau Grouper	Epinephelus striatus	Kobara, S., & Heyman, W. D. (2008). Geomorphometric Patterns of Nassau Grouper (Epinephelus striatus) Spawning Aggregation Sites in the Cayman Islands. Marine Geodesy, 31(4), 231. http://doi.org/10.1080/01490410802466397
Nassau Grouper	Epinephelus striatus	Munro, J. L., Gaut, V. C., Thompson, R., & Reeson, P. H. (1973). The spawning seasons of Caribbean reef fishes. Journal of Fish Biology, 5(1), 69. http://doi.org/10.1111/j.1095-8649.1973.tb04431.x
Nassau Grouper	Epinephelus striatus	NMFS. (2008). Nassau Grouper , Epinephelus striatus (Bloch 1792) Biological Report, (Bloch 1792), 1–117. Retrieved from http://sero.nmfs.noaa.gov/protected_resources/listing_petitions/documents/biological_report.pdf
Nassau Grouper	Epinephelus striatus	Olsen, David A.; LaPlace, J. A. (1978). A study of a Virgin Islands Grouper Fishery Based on a Breeding Aggregation. Current Caribbean Fisheries Research, 130–144. Retrieved from http://core.ac.uk/download/pdf/18310949.pdf
Nassau Grouper	Epinephelus striatus	Sadovy De Mitcheson, Y., Cornish, A., Domeier, M., Colin, P. L., Russell, M., & Lindeman, K. C. (2008). A global baseline for spawning aggregations of reef fishes. Conservation Biology, 22(5), 1233–1244. http://doi.org/10.1111/j.1523-1739.2008.01020.x
Nassau Grouper	Epinephelus striatus	Sadovy, Y., & Colin, P. (1995). Sexual development and sexuality in the Nassau grouper. Journal of Fish Biology, 46(6), 961–976. http://doi.org/10.1006/jfbi.1995.0092
Nassau Grouper	Epinephelus striatus	Sadovy, Y., & Eklund, A. M. (1999). Synopsis of biological data on the Nassau grouper, Epinephelus striatus (Bloch, 1792), and the jewfish, E. itajara (Lichenstein, 1822). NOAA Technical Report NMFS 146. Retrieved from http://aquaticcommons.org/2523/
Nassau Grouper	Epinephelus striatus	Sala, E., Ballesteros, E., & Starr, R. (2001). Rapid Decline of Nassau Grouper Spawning Aggregations in Belize : Fishery Management and Conservation Needs Rapid Decline of Nassau Grouper Spawning Aggregations in Belize : Fishery Management and Conservation Needs. Fisheries, 26(10), 23–30. http://doi.org/10.1577/1548-8446(2001)026<0023
Nassau Grouper	Epinephelus striatus	Schärer, M. T., Nemeth, R. S., Tuohy, E., Clouse, K., Nemeth, M. I., & Appeldoorn, R. S. (2014). Nassau grouper Epinephelus striatus fish spawning aggregations in the US Caribbean. Gulf & Caribbean Fisheries Institute, 66, 408–412. Retrieved from http://flseagrant.ifas.ufl.edu/GCFI/papers/098.pdf
Nassau Grouper	Epinephelus striatus	Schärer, M. T., Rowell, T. J., Nemeth, M. I., & Appeldoorn, R. S. (2012). Sound production associated with reproductive behavior of Nassau grouper Epinephelus striatus at spawning aggregations. Endangered Species Research, 19(1), 29. http://doi.org/10.3354/esr00457
Nassau Grouper	Epinephelus striatus	Semmens, B. X., Luke, K. E., Bush, P. G., Pattengill-Semmens, C. V., Johnson, B., Mccoy, C. M., & Heppell, S. A. (2006). Investigating the reproductive migration and spatial ecology of Nassau grouper (Epinephelus striatus) on Little Cayman Island using acoustic tags–An Overview. Gulf & Caribbean Fisheries Institute, 56, 199–206. Retrieved from http://oz.reef.org/data/GCFI_2005_GMPfinal.pdf
Nassau Grouper	Epinephelus striatus	Sluka, R., Chiappone, M., Sullivan, K. M., Potts, T. A., Levy, J. M., Schmitt, E. F., & Meester, G. (1998). Density, species and size distribution of groupers (Serranidae) in three habitats at Elbow Reef, Florida Keys. Bulletin of Marine Science, 62(1), 219–228. Retrieved from http://www.ingentaconnect.com/content/umrsmas/bullmar/1998/00000062/00000001/art00020
Nassau Grouper	Epinephelus striatus	Smith, C. L. (1972). A spawning aggregation of nassau grouper, Epinephelus striatus (Bloch). Transactions of the American Fisheries Society, 101(2), 257–261. http://doi.org/10.1577/1548-8659(1972)101<257:ASAONG>2.0.CO;2
Nassau Grouper	Epinephelus striatus	Starr, R. M., Sala, E., Ballesteros, E., & Zabala, M. (2007). Spatial dynamics of the Nassau grouper Epinephelus striatus in a Caribbean atoll. Marine Ecology Progress Series, 343(1), 239–249. http://doi.org/10.3354/meps06897
Nassau Grouper	Epinephelus striatus	Taylor, J. C., Eggleston, D. B., & Rand, P. S. (2006). Nassau grouper (Epinephelus striatus) spawning aggregations: hydroacoustic surveys and geostatistical analysis. NOAA Professional Paper, NMFS(5), 18–25. Retrieved from http://spo.nwr.noaa.gov/pp5.pdf
Nassau Grouper	Epinephelus striatus	Thompson, R., & Mumot, J. L. (1978). Aspects of the biology and ecology of Caribbean reef fishes : Serranidae (hinds and groupers). Journal of Fish Biology, 12, 115–146. http://doi.org/10.1111/j.1095-8649.1978.tb04158.x
Nassau Grouper	Epinephelus striatus	Tucker W., Jr., J., Bush G., P., & Slaybaugh T., S. (1993). Reproductive patterns of Cayman Island Nassau Grouper (Epiniphelus striatus) populations. Bulletin of Marine Science, 52(2), 961–969. Retrieved from http://www.ingentaconnect.com/content/umrsmas/bullmar/1993/00000052/00000003/art00009
Nassau Grouper	Epinephelus striatus	Whaylen, L., Bush, P., Johnson, B., Luke, K. E., Mccoy, C., Heppell, S., … Boardman, M. (2006). Characterizing a spawning aggregation over a period of five consecutive years at Little Cayman, Cayman Islands. Gulf and Caribbean Fisheries Institute Proceedings, 1–14. Retrieved from http://www.reef.org/reef_files/Whaylenetal2006GCFI.pdf
Nassau Grouper	Epinephelus striatus	Whaylen, L., Pattengill-Semmens, C. V, Semmens, B. X., Bush, P. G., & Boardman, M. R. (2004). Observations of a Nassau grouper, Epinephelus striatus, Spawning Aggregation Site in Little Cayman, Cayman Islands, Including Multi-Species Spawning Information. Environmental Biology of Fishes, 70(3), 305–313. http://doi.org/10.1023/b:ebfi.0000033341.57920.a8
Other	Other	Addis, D., Chagaris, D., Muller, R. G., Murphy, M. D., Hop, J. O., & Tyler-jedlund, M. (2015). Florida ’ s Inshore and Nearshore Species : 2015 Status and Trends Report. St. Petersburg, FL: Florida Fish and Wildlife Conservation Commission.
Other	Other	Brulé, T., Colas-Marrufo, T., Perez-Diaz, E., & Déniel, C. (1998). Biology, exploitation and management of groupers (serranidae, epinephelinae, epinephelini) and snappers (lutjanidae, lutjaninae,. Habitat, (10), 137–179. Retrieved from http://www.harteresearchinstitute.org/images/Environmental_Analysis/8.pdf
Other	Other	Cheung, W. W. L., Pitcher, T. J., & Pauly, D. (2005). A fuzzy logic expert system to estimate intrinsic extinction vulnerabilities of marine fishes to fishing. Biological Conservation, 124(1), 97–111. http://doi.org/10.1016/j.biocon.2005.01.017
Other	Other	Cody, T. J., Fuls, B. E., Matlock, G. C., & Bryan, C. E. (1981). Assessment of bottom longline fishing off the central Texas coast. Texas Parks and Wildlife. Austin, TX.
Other	Other	Coleman, F. C., & Williams, S. L. (2002). Overexploiting marine ecosystem engineers: Potential consequences for biodiversity. Trends in Ecology and Evolution, 17(1), 40–44. http://doi.org/10.1016/S0169-5347(01)02330-8
Other	Other	Coleman, F. C., Baker, P. B., & Koenig, C. C. (2004). A Review of Gulf of Mexico Marine Protected Areas: Successes, Failures, and Lessons Learned. Fisheries, 29(2), 10–21. http://doi.org/10.1577/1548-8446(2004)29[10:arogom]2.0.co;2
Other	Other	Domeier, M. L. (2012). Revisiting Spawning Aggregations: Definitions and Challenges. In Y. Sadovy De Mitcheson & P. L. Colin (Eds.), Reef fish spawning aggregations: biology (p. 20). Springer Netherlands. http://doi.org/10.1007/978-94-007-1980-4_1
Other	Other	Gulf of Mexico Fishery Management Council. (2015). Recreational Fishing Regulations for Gulf of Mexico Federal Waters. Tampa, FL. Retrieved from http://gulfcouncil.org/fishing_regulations/RecreationalRegulations.pdf
Other	Other	Karnauskas, M., Chérubin, L. M., & Paris, C. B. (2011). Adaptive significance of the formation of multi-species fish spawning aggregations near submerged capes. PLoS ONE, 6(7). http://doi.org/10.1371/journal.pone.0022067
Other	Other	Kline, R. J., Khan, I. A., & Holt, G. J. (2011). Behavior, color change and time for sexual inversion in the protogynous grouper (Epinephelus adscensionis). PLoS ONE, 6(5). http://doi.org/10.1371/journal.pone.0019576
Other	Other	Koenig, C. C., Coleman, F. C., Grimes, C. B., Fitzhugh, G. R., Scanlon, K. M., Gledhill, C. T., & Grace, M. (2000). Protection of fish spawning habitat for the conservation of warm temperate reef fish fisheries of shelf edge reefs of Florida. Bulletin of Marine Science, 66(3), 593–616. Retrieved from http://www.ingentaconnect.com/content/umrsmas/bullmar/2000/00000066/00000003/art00008
Other	Other	Levesque, J. C. (2011). Commercial fisheries in the northwestern Gulf of Mexico : possible implications for conservation management at the Flower Garden Banks National Marine Sanctuary. ICES Journal of Marine Science, 68(10), 2175–2190. Retrieved from http://icesjms.oxfordjournals.org/content/68/10/2175.full.pdf
Other	Other	Morley, D., Kellison, T., Taylor, C., Gleason, A. R. T., Acosta, A., Feeley, M., … Road, O. C. (2011). Examining Reef Fish Aggregations in the Florida Keys Examinando Agregaciones de Desove de Peces en los Cayos de la Florida Examen des Agrégations de Poissons de Récifs dans les Florida Keys, 2011–2012. Retrieved from http://www.gcfi.org/proceedings/sites/default/files/procs/GCFI%7B_%7D64-42.pdf
Other	Other	Robertson DR, and J Van Tassell. 2015. Shorefishes of the Greater Caribbean: online information system. Version 1.0 Smithsonian Tropical Research Institute, Balboa, Panamá. Online database found at: http://biogeodb.stri.si.edu/caribbean/en/pages
Other	Other	Robertson DR, Tassell J Van (2015) Shorefishes of the Greater Caribbean: online information system. Smithson Trop Res Inst
Other	Other	Scott-Denton, E., Cryer, P. F., Gocke, J. P., Harrelson, M. R., Kinsella, D. L., Pulver, J. R., … Williams, J. A. (2011). Descriptions of the U.S. Gulf of Mexico reef fish bottom longline and vertical line fisheries based on observer data. Marine Fisheries Review, 73(2), 1–26. Retrieved from http://spo.nmfs.noaa.gov/mfr732/mfr7321.pdf%5Cnhttp://aquaticcommons.org/9662/%5Cnhttp://aquaticcommons.or…
Other	Other	Sonnier, F., Teerling, J., & Hoese, H. D. (1976). Observations on the Offshore Reef and Platform Fish Fauna of Louisiana. Copeia, 1976(1), 105–111.
Other	Other	Thorson, J. T., & Berkson, J. (2010). Multispecies estimation of Bayesian priors for catchability trends and density dependence in the US Gulf of Mexico. Canadian Journal of Fisheries and Aquatic Sciences, 67(6), 936–954. http://doi.org/10.1139/F10-040
Red Drum	Sciaenops ocellatus	ASMFC. (2010). Sciaenops ocellatus. Retrieved January 22, 2016, from http://www.asmfc.org/uploads/file/redDrumProfile.pdf
Red Drum	Sciaenops ocellatus	Beckman, D. W., Wilson, C. A., & Stanley, A. L. (1989). Age and growth of red drum, Sciaenops ocellatus, from offshore waters of the northern Gulf of Mexico. Fishery Bulletin, 1989, 140(2), 249. http://doi.org/10.1007/s002270100692
Red Drum	Sciaenops ocellatus	Collins, M. R., Callahan, B. M., & Post, W. C. (2001). Spawning aggregations of recreationally important Sciaenid species in the Savannah Harbor: spotted seatrout Cynoscion nebulosus, red drum Sciaenops ocellatus, weakfish Cynoscion regalis, and black drum Pogonias cromis. South Carolina Department of Natural Resources, Charleston, South Carolina. Retrieved from https://www.researchgate.net/publi…
Red Drum	Sciaenops ocellatus	Craig, S. R., MacKenzie, D. S., Jones, G., & Gatlin, D. M. (2000). Seasonal changes in the reproductive condition and body composition of free-ranging red drum, Sciaenops ocellatus. Aquaculture, 190(1–2), 89–102. http://doi.org/10.1016/S0044-8486(00)00386-0
Red Drum	Sciaenops ocellatus	Davis, J. T. (1990). Red Drum: biology and life history. College Station, TX: Southern Regional Aquaculture Center. Retrieved from http://agris.fao.org/agris-search/search.do?recordID=US9193822
Red Drum	Sciaenops ocellatus	Fisher, M. (2016). Biology of Red Drum. Retrieved from http://www.rockportflyfishers.com/articles/biology_of_red_drum.pdf
Red Drum	Sciaenops ocellatus	FWCC. (n.d.). Red Drum Quick Facts. Retrieved from http://myfwc.com/research/saltwater/fish/red-drum/quick-facts/
Red Drum	Sciaenops ocellatus	Goodyear, C. P. (1989). Status of the Red Drum stocks of the Gulf of Mexico: Report for 1989. Southeast Fisheries Science Center. Miami, FL. Retrieved from https://www.researchgate.net/publication/264785330_Status_of_the_red_drum_stocks_of_the_Gulf_of_Mexico_Report_for_1989
Red Drum	Sciaenops ocellatus	Guest, W. C., & Lasswell, J. L. (1978). A Note on Courtship Behavior and Sound Production of Red Drum. Copeia, 1978(2), 337–338. http://doi.org/10.2307/1443576
Red Drum	Sciaenops ocellatus	Holt, G. J., Holt, S. A., & Arnold, C. R. (1985). Diel periodicity of spawning in sciaenids. Marine Ecology Progress Series, 27, 1–7. http://doi.org/10.3354/meps027001
Red Drum	Sciaenops ocellatus	Holt, S. A. (2002). Intra and Inter-Day Variability in Sound Production By Red Drum (Sciaenidae) At a Spawning Site. Bioacoustics, 12(2–3), 227–229. http://doi.org/10.1080/09524622.2002.9753704
Red Drum	Sciaenops ocellatus	Holt, S. A. (2002). Using a towed array to survey red drum spawning sites in the Gulf of Mexico. Passive Acoustics: Extended Abstracts, Session I. Retrieved from http://seagrant.mit.edu/cfer/passiveacoustics/PAprocBrWeb.pdf#page=49
Red Drum	Sciaenops ocellatus	Holt, S. A. (2008). Distribution of red drum spawning sites identified by a towed hydrophone array. Transactions of the American Fisheries Society, 137(2), 551–561. http://doi.org/10.1577/T03-209.1
Red Drum	Sciaenops ocellatus	Johnson, D. R., & Funicelli, N. a. (1991). Spawning of the red drum in Mosquito Lagoon, East-Central Florida. Estuaries, 14(1), 74–79. http://doi.org/10.1007/BF02702164
Red Drum	Sciaenops ocellatus	Lanier, J. M., & Scharf, F. S. (2007). Experimental investigation of spatial and temporal variation in estuarine growth of age-0 juvenile red drum (Sciaenops ocellatus). Journal of Experimental Marine Biology and Ecology, 349(1), 131–141. http://doi.org/10.1016/j.jembe.2007.05.004
Red Drum	Sciaenops ocellatus	Latour, R. J., Pollock, K. H., Wenner, C. A., & Hoenig, J. M. (2001). Estimates of Fishing and Natural Mortality for Subadult Red Drum in South Carolina Waters. North American Journal of Fisheries Management, 21(4), 733. http://doi.org/10.1577/1548-8675(2001)021
Red Drum	Sciaenops ocellatus	Lowerre-Barbieri, S. K., Barbieri, L. R., Flanders, J. R., Woodward, A. G., Cotton, C. F., Knowlton, M. K., & Lowerre, S. K. (2008). Use of passive acoustics to determine red drum spawning in Georgia waters. Transactions of the American Fisheries Society, 137(2), 562. http://doi.org/10.1577/t04-226.1
Red Drum	Sciaenops ocellatus	Lowerre-Barbieri, S. K., Burnsed, S. L. W., & Bickford, J. W. (2015). Assessing reproductive behavior important to fisheries management: a case study with Red Drum, Sciaenops ocellatus. Ecological Applications. http://doi.org/10.1890/15-0497.1
Red Drum	Sciaenops ocellatus	Lowerre-barbieri, S., Tringali, M., Bickford, J., & Burnsed, S. (2016). The Red Drum (Sciaenops ocellatus) spawning population in the eastern Gulf of Mexico : composition , site fidelity , and size. SEDAR 49-DW-07, SEDAR, North Charleston, SC.
Red Drum	Sciaenops ocellatus	Luczkovich, J. J., Daniel III, H. J., & Sprague, M. W. (1999). Characterization of critical spawning habitats of weakfish , spotted seatrout and red drum in Pamlico Sound using hydrophone surveys. Final Report and Annual Performance Report. North Carolina Department of Natural Resources. Moorehead City, NC.
Red Drum	Sciaenops ocellatus	Matlock, G. C. (1987). The life history of the red drum. Manual of Red Drum Aquaculture. Retrieved from http://nsgl.gso.uri.edu/tamu/tamuw87003/tamuw87003_part1.pdf
Red Drum	Sciaenops ocellatus	Mercer, L. (1984). S18-RD57 RD Biological and Fisheries Profile on Red Drum. SEDAR 18. North Carolina Department of Natural Resources. Moorehead City, NC. Retrieved from http://sedarweb.org/docs/wsupp/S18-RD57 RD biological%2C fisheries profile.pdf
Red Drum	Sciaenops ocellatus	Murphy, M. D., & Crabtree, R. E. (2001). Changes in the age structure of nearshore adult red drum off west-central Florida related to recruitment and fishing mortality. North American Journal of Fisheries Management, 21, 671–678. Retrieved from http://www.tandfonline.com/doi/full/10.1577/1548-8675%282001%29021%3C0671%3ACITASO%3E2.0.CO%3B2
Red Drum	Sciaenops ocellatus	Murphy, M. D., & Taylor, R. G. (1990). Reproduction, growth, and mortality of red drum Sciaenops ocellatus in Florida waters. Fishery Bulletin, 88(3), 531–542. Retrieved from http://www.vliz.be/en/imis?refid=195842
Red Drum	Sciaenops ocellatus	Osburn, H. R., Matlock, G. C., & Green, A. W. (1982). Red drum (Sciaenops ocellatus) movement in Texas bays. Contributions in Marine Science, 25, 85–97. Retrieved from http://repositories.tdl.org/tamug-ir/handle/1969.3/19067
Red Drum	Sciaenops ocellatus	Overstreet, R. (1983). Aspects of the Biology of the Spotted Seatrout, Cynoscion nebulosus, in Mississippi. Gulf Research Reports, 1(Supplement), 1–43. http://doi.org/10.18785/grr.07supp.02
Red Drum	Sciaenops ocellatus	Parmentier, E., Tock, J., Falguière, J.-C., & Beauchaud, M. (2014). Sound production in Sciaenops ocellatus: Preliminary study for the development of acoustic cues in aquaculture. Aquaculture, 432(MAY), 204–211. http://doi.org/10.1016/j.aquaculture.2014.05.017
Red Drum	Sciaenops ocellatus	Patterson, H. M., McBride, R. S., & Julien, N. (2004). Population structure of red drum (Sciaenops ocellatus) as determined by otolith chemistry. Marine Biology, 144(5), 855–862. http://doi.org/10.1007/s00227-003-1254-x
Red Drum	Sciaenops ocellatus	Perret, W. S., Weaver, J. E., Williams, R. O., Johansen, P. L., McIlwain, T. D., & Raulerson, R. C. (1980). Fishery profile of red drum and spotted seatrout. Gulf States Marine Fisheries Commission. Ocean Springs, MS. Retrieved from http://repositories.tdl.org/tamug-ir/handle/1969.3/22328
Red Drum	Sciaenops ocellatus	Porch, C. E., Wilson, C. A., & Nieland, D. L. (2002). A new growth model for red drum (Sciaenops ocellatus) that accommodates seasonal and ontogenic changes in growth rates. Fishery Bulletin, 100, 149–152. Retrieved from http://aquaticcommons.org/15199/
Red Drum	Sciaenops ocellatus	Powers, S., Hightower, C. L., Drymon, J. M., & Johnson, M. (2012). Age composition and distribution of red drum (Sciaenops ocellatus) in offshore waters of the north central Gulf of Mexico: an evaluation of a stock under a federal harvest. Fishery Bulletin, 283–292. http://doi.org/10.1051/alr/2015006
Red Drum	Sciaenops ocellatus	Reagan, R. E. (1985). Species Profiles. Life Histories and Environmental Requirements of Coastal Fishes and Invertebrates (Gulf of Mexico). RED DRUM. U.S. Fish Wildl. Serv. Biol. Rep., 82(11). Retrieved from http://oai.dtic.mil/oai/oai?verb=getRecord&amp;metadataPrefix=html&amp;identifier=ADA162650
Red Drum	Sciaenops ocellatus	Reyier, E. A., Lowers, R. H., Scheidt, D. M., & Adams, D. H. (2010). Movement patterns of adult red drum, Sciaenops ocellatus, in shallow Florida lagoons as inferred through autonomous acoustic telemetry. Environmental Biology of Fishes, 90(4), 343–360. http://doi.org/10.1007/s10641-010-9745-3
Red Drum	Sciaenops ocellatus	Rooker, J., & Holt, S. (1997). Utilization of subtropical seagrass meadows by newly settled red drum Sciaenops ocellatus :patterns of distribution and growth. Marine Ecology Progress Series, 158, 139–149. http://doi.org/10.3354/meps158139
Red Drum	Sciaenops ocellatus	Roumillat, W. A., Riekerk, G. H. M., & Tyree, S. J. (1995). Acoustic sampling to identify red drum., spotted seatrout, and black drum spawning locations in South Carolina and Georgia. Final Essential Fish Habitat Plan. South Atlantic Fishery Management Council. North Charleston, SC. Retrieved from http://www.safmc.net/habitat-ecosystem/pdf/Hab_planAppS.pdf
Red Drum	Sciaenops ocellatus	SEDAR. (2015). SEDAR 44 Atlantic Red Drum Stock Assessment Report. SEDAR. North Charleston, SC. Retrieved from http://sedarweb.org/docs/sar/S44_AtlRedDrumSAR_9.22.2015_FINAL.pdf
Red Drum	Sciaenops ocellatus	Sedar. (2016). Sedar 49 Gulf of Mexico Data-limited Species : red drum, lane snapper, wenchman, yellowmouth grouper, speckled hind, snowy grouper, almaco jack, lesser amberjack. North Charleston, SC.
Red Drum	Sciaenops ocellatus	Vaughan, D. S., & Carmichael, J. T. (2002). Estimating Improvement in Spawning Potential Ratios for South Atlantic Red Drum through Bag and Size Limit Regulations. North American Journal of Fisheries Management, 22(3), 895–906. http://doi.org/10.1577/1548-8675(2002)022
Red Drum	Sciaenops ocellatus	Waggy, G. L., & Brown, N. J. (2006). Evaluation of the reproductive life history of the Sciaenidae in the Gulf of Mexico and Caribbean Sea:“greater” versus “lesser” strategies? Proc. Gulf Caribb. Fish. …. Retrieved from http://gcrl.usm.edu/cv/peterson.mark/docs/Waggy et al. 2006 GCFI 57.pdf
Red Drum	Sciaenops ocellatus	Wilson, C. A., & Nieland, D. L. (1994). Reproductive biology of red drum, Sciaenops ocellatus, from the neritic waters of the northern Gulf of Mexico. Fishery Bulletin, 92, 841–850. Retrieved from http://sedarweb.org/docs/wsupp/S18-RD33 RD reproductive biology, neritic waters, N GoM.pdf
Red Drum	Sciaenops ocellatus	Wilson, C. A., & Nieland, D. L. (2000). The variation of year-class strength and annual reproductive output of red drum, sciaenops ocellatus, and from the northern Gulf of Mexico. Lousiana State University. Coastal Fisheries Institute: Coastal Fisheries Institute, Center for Wetland Resources, Louisiana State University.
Red Drum	Sciaenops ocellatus	Winner, B. L., Flaherty-Walia, K. E., Switzer, T. S., & Vecchio, J. L. (2014). Multidecadal Evidence of Recovery of Nearshore Red Drum Stocks off West-Central Florida and Connectivity with Inshore Nurseries. North American Journal of Fisheries Management, 34(4), 780–794. http://doi.org/10.1080/02755947.2014.920737
Red Grouper	Epinephelus morio	Arreguín-sánchez, F. (1999). Catchability estimates and their application to the red grouper (Epinephelus morio) fishery of the Campeche Bank, Mexico. Fishery Bulletin, 1999, 24(3), 282. http://doi.org/10.1111/j.1439-0426.2008.01070.x
Red Grouper	Epinephelus morio	Brulé, T., & Deniel, C. (1996). Biological research on the red grouper (Epinephelus morio) from the southern Gulf of Mexico. In F. Arreguín-sánchez, J. L. Munro, M. C. Balgos, & D. Pauly (Eds.), Biology, Fisheries, and Culture of Tropical Groupers and Snappers (p. 28). International Center for Living Aquatic Resources Management. Retrieved from http://pubs.iclarm.net/libinfo/Pdf/Pub CP6 48.pdf
Red Grouper	Epinephelus morio	Brulé, T., Déniel, C., Colás-Marrufo, T., & Sánchez-Crespo, M. (1999). Red Grouper Reproduction in the Southern Gulf of Mexico. Transactions of the American Fisheries Society, 3(128), 385–402. http://doi.org/10.1577/1548-8659(1999)128
Red Grouper	Epinephelus morio	Burgos, J. M., Sedberry, G. R., & Wyanski, D. M. (2007). Life history of red grouper (Epinephelus morio) off the coasts of North Carolina and South Carolina. Bulletin of Marine Science, 80(1), 45–65. Retrieved from http://www.ingentaconnect.com/content/umrsmas/bullmar/2007/00000080/00000001/art00003
Red Grouper	Epinephelus morio	Burgos, R., & Defeo, O. (2004). Long-term population structure, mortality and modeling of a tropical multi-fleet fishery: the red grouper Epinephelus morio of the Campeche Bank, Gulf of Mexico. Fisheries Research, 66, 325–335. http://doi.org/10.1016/S0165-7836(03)00192-9
Red Grouper	Epinephelus morio	Carruthers, T. R., Walter, J. F., McAllister, M. K., Bryan, M. D., & Wilberg, M. (2015). Modelling age-dependent movement: an application to red and gag groupers in the Gulf of Mexico. Canadian Journal of Fisheries and Aquatic Sciences, 72(8), 1159–1176. http://doi.org/10.1139/cjfas-2014-0471
Red Grouper	Epinephelus morio	Coleman, F. C., & Koenig, C. C. (2010). The effects of fishing, climate change, and other anthropogenic disturbances on red grouper and other reef fishes in the Gulf of Mexico. Integrative and Comparative Biology, 50(2), 201–212. http://doi.org/10.1093/icb/icq072
Red Grouper	Epinephelus morio	Coleman, F. C., Koenig, C. C., & Collins, L. A. (1996). Reproductive styles of shallow-water groupers (Pisces: Serranidae) in the eastern Gulf of Mexico and the consequences of fishing spawning aggregations. Environmental Biology of Fishes, 47(47), 129–141. http://doi.org/10.1007/BF00005035
Red Grouper	Epinephelus morio	Coleman, F. C., Koenig, C. C., Huntsman, G. R., Musick, J. A., Eklund, A. M., McGovern, J. C., … Grimes, C. B. (2000). Long-lived Reef Fishes: The Grouper-Snapper Complex. Fisheries, 25(3), 14–21. http://doi.org/10.1577/1548-8446(2000)025
Red Grouper	Epinephelus morio	Coleman, F. C., Koenig, C. C., Scanlon, K. M., Heppell, S., Heppell, S., & Miller, M. W. (2010). Benthic Habitat Modification through Excavation by Red Grouper, Epinephelus morio, in the Northeastern Gulf of Mexico. The Open Fish Science Journal, 3(1), 1–15. http://doi.org/10.2174/1874401X01003010001
Red Grouper	Epinephelus morio	Coleman, F. C., Scanlon, K. M., & Koenig, C. C. (2011). Groupers on the edge: shelf edge spawning habitat in and around marine reserves of the Northeastern Gulf of Mexico. Professional Geographer, 63(4), 456–474. http://doi.org/10.1080/00330124.2011.585076
Red Grouper	Epinephelus morio	Collins, L., Fitzhugh, G., Lombardi-Carlson, L., Lyon, H., Walling, W., & Oliver, D. (2002). Characterization of red grouper (Serranidae: Epinephelus morio) reproduction from the eastern Gulf of Mexico. National Marine Fisheries Service Southeast Fisheries Science Center, Contributi, 1–21. Retrieved from http://safmc.net/Portals/6/Meetings/Council/BriefingBook/Jun08/SSC/A28_Collins2002.pdf
Red Grouper	Epinephelus morio	Farmer, N. A., Malinowski, R. P., McGovern, M. F., & Rubec, P. J. (2016). Stock complexes for fisheries management in the Gulf of Mexico. Marine and Coastal Fisheries, 8(1), 177–201. http://doi.org/10.1080/19425120.2015.1024359
Red Grouper	Epinephelus morio	Fitzhugh, G. R., Lyon, H. M., Walling, W. T., & Levins, C. F. (2006). An update of Gulf of Mexico red grouper reproductive data and parameters for SEDAR 12. Sedar, 12(DW4). Retrieved from http://sedarweb.org/docs/wpapers/S12 DW04 reproduction.pdf
Red Grouper	Epinephelus morio	Freitas, M. O., de Moura, R. L., Francini-Filho, R. B., & Minte-Vera, C. V. (2011). Spawning patterns of commercially important reef fish (Lutjanidae and Serranidae) in the tropical western South Atlantic. Scientia Marina, 75(1), 135–146. http://doi.org/10.3989/scimar.2011.75n1135
Red Grouper	Epinephelus morio	Gentner, B. (2009). Allocation analysis of the Gulf of Mexico gag and red grouper fisheries. Prepared for the Coastal Conservation Association. Retrieved from http://gulfcouncil.org/Beta/GMFMCWeb/downloads/BB 2009-04/B - 4(b) Grouper Allocation Report by Gentner for CCA.pdf
Red Grouper	Epinephelus morio	Giménez-hurtado, E., Arreguín-sánchez, F., & Lluch-cota, S. E. (2009). Natural Mortality Rates During Life History Stages of the Red Grouper on Campeche Bank, Mexico. North American Journal of Fisheries ManagementFisheries, 29(1), 216–222. http://doi.org/10.1577/M06-041.1
Red Grouper	Epinephelus morio	Giménez-Hurtado, E., Coyula-Pérez-Puelles, R., Lluch-Cota, S. E., González-Yañez, A. A., Moreno-García, V., & Burgos-de-la-Rosa, R. (2005). Historical biomass, fishing mortality, and recruitment trends of the Campeche Bank red grouper (Epinephelus morio). Fisheries Research, 71(3), 267. http://doi.org/10.1016/j.fishres.2004.09.001
Red Grouper	Epinephelus morio	Goodyear, C. P. (1995). Mean Size at Age: An Evaluation of Sampling Strategies with Simulated Red Grouper Data. Transactions of the American Fisheries Society, 124, 746–755. http://doi.org/10.1577/1548-8659(1995)124<0746:MSAAAE>2.3.CO;2
Red Grouper	Epinephelus morio	Goodyear, C. P., & Schirripa, M. J. (1993). The red grouper fishery of the Gulf of Mexico. Southeast Fisheries Science Center. Miami, FL. Retrieved from http://www.researchgate.net/profile/C_Goodyear/publication/264898929_THE_RED_GROUPER_FISHERY_OF_THE_GULF_OF_MEXICO/links/53f54e1b0cf2888a7491bd1c.pdf
Red Grouper	Epinephelus morio	Hernandez, A., & Seijo, J. C. (2003). Spatial distribution analysis of red grouper (Epinephelus morio) fishery in Yucatan, Mexico. Fisheries Research, 63(1), 135–141. http://doi.org/10.1016/S0165-7836(03)00039-0
Red Grouper	Epinephelus morio	Johnson, K., Thomas, P., & Wilson, R. R. (1998). Seasonal cycles of gonadal development and plasma sex steroid levels in Epinephelus morio, a protogynous grouper in the eastern Gulf of Mexico. Journal of Fish Biology, 52(3), 502–518. http://doi.org/10.1111/j.1095-8649.1998.tb02013.x
Red Grouper	Epinephelus morio	Jory, D. E., & Iversen, E. S. (1989). Species profiles: Life histories and environmental requirements of coastal fishes and invertebrates (South Florida): Black, red and Nassau groupers. U.S. Fish Wildl. Serv. Biol. Rep., 82(11), 21. Retrieved from http://oai.dtic.mil/oai/oai?verb=getRecord&amp;metadataPrefix=html&amp;identifier=ADA214299
Red Grouper	Epinephelus morio	Lombardi-Carlson, L. A., Fitzhugh, G. R., & Mikulas, J. J. (2002). Red Grouper (Epinephelus morio) age - length structure and description of growth from the eastern Gulf of Mexico : 1992-2001 . National Marine Fisheries Service Southeastern Fisheries S. Methods, 1992–2001.
Red Grouper	Epinephelus morio	Lombardi-Carlson, L., Fitzhugh, G., Palmer, C., Gardner, C., Farsky, R., & Ortiz, M. (2008). Regional size, age and growth differences of red grouper (Epinephelus morio) along the west coast of Florida. Fisheries Research, 91(2–3), 239–251. http://doi.org/10.1016/j.fishres.2007.12.001
Red Grouper	Epinephelus morio	Lombardi-carlson, L., Palmer, C., Gardner, C., & Farsky, B. (2006). Temporal and spatial trends in red grouper (Epinephelus morio) age and growth from the northeastern Gulf of Mexico : 1979-2005. Fisheries Science, (July), 1979–2005.
Red Grouper	Epinephelus morio	López-Rocha, J. A., & Arreguín-Sánchez, F. (2008). Spatial distribution of red grouper Epinephelus morio (Serranidae) catchability on the Campeche Bank of Mexico. Journal of Applied Ichthyology, 24(3), 282. http://doi.org/10.1111/j.1439-0426.2008.01070.x
Red Grouper	Epinephelus morio	López-Rocha, J. A., & Arreguín-Sánchez, F. (2013). Spatial dynamics of the red grouper Epinephelus morio (Pisces: Serranidae) on the Campeche Bank, Gulf of Mexico. Scientia Marina, 77(2), 313–322. http://doi.org/10.3989/scimar.03565.13B
Red Grouper	Epinephelus morio	López-Rocha, J. A., Albañez-Lucero, M. O., Arreguín-Sánchez, F., & de Anda-Montañez, J. A. (2009). Analysis of the spatial and seasonal variation in catchability of red grouper, Epinephelus morio ( Valenciennes, 1828 ), in the Campeche Bank before overfishing ( 1973-1977 ). Revista de Biología Marina Y Oceanografia, 44(3), 751–761. http://doi.org/10.4067/S0718-19572009000300020
Red Grouper	Epinephelus morio	Lowerre-Barbieri, S., Crabtree, L., Switzer, T. S., & Robert H. McMichael, J. (2014). Maturity , sexual transition , and spawning seasonality in the protogynous red grouper on the West Florida Shelf. Sedar 42-DW-07. Retrieved from http://sedarweb.org/docs/wpapers/S42_DW_07_repro_v2.pdf
Red Grouper	Epinephelus morio	McGovern, J. C., Burgos, J. M., & Harris, P. J. (2002). Aspects of the Life History of Red Grouper, Epinephelus morio, Along the Southeastern United States. MARFIN Final Report. Retrieved from http://sedarweb.org/docs/wsupp/S19_RD33_McGovernetal2002.pdf
Red Grouper	Epinephelus morio	Moe, M. A. J. (1969). Biology of the Red Grouper Epinephelus morio (Valenciennes) from the Eastern Gulf of Mexico. Florida Department of Natural Resources. St. Petersburg, FL. Retrieved from http://share.disl.org/library/Uncatergorized2/Professional Papers Series Number 10)Biology of the Red Grouper Eastern Gulf of Mexico.pdf
Red Grouper	Epinephelus morio	Montie, M. D. (2010). Sound production and behavior of red grouper (Epinephelus morio) on the West Florida Shelf. University of South Florida. Retrieved from http://scholarcommons.usf.edu/etd/1715/
Red Grouper	Epinephelus morio	Nelson, M. D., Koenig, C. C., Coleman, F. C., & Mann, D. A. (2011). Sound production of red grouper Epinephelus morio on the west Florida shelf. Aquatic Biology, 12(2), 97–108. http://doi.org/10.3354/ab00325
Red Grouper	Epinephelus morio	Noaa. (2005). Stock Assessment and Fishery Evaluation Report for the Snapper Grouper Fishery of the South Atlantic November 18, 2005. South Atlantic Fishery Management Council. Retrieved from http://sero.nmfs.noaa.gov/sustainable_fisheries/safe_reports/documents/pdfs/snapper_grouper_2005_safe.pdf
Red Grouper	Epinephelus morio	Rudershausen, P. J., Williams, E. H., Buckel, J. A., Potts, J. C., & Manooch, C. S. (2008). Comparison of reef fish catch per unit effort and total mortality between the 1970s and 2005-2006 in Onslow Bay, North Carolina. Transactions of the American Fisheries Society, 137(5), 1389–1405. http://doi.org/10.1577/T07-159.1
Red Grouper	Epinephelus morio	Schirripa, M. J., & Burns, K. M. (1997). Growth estimates for three species of reef fish in the eastern Gulf of Mexico. Bulletin of Marine Science, 61(3), 581–591. Retrieved from http://www.ingentaconnect.com/content/umrsmas/bullmar/1997/00000061/00000003/art00010
Red Grouper	Epinephelus morio	SEDAR. (2006). SEDAR 12 Stock Assessment Report Gulf of Mexico Red Grouper. SEDAR. Charleston, SC. Retrieved from http://sedarweb.org/docs/sar/S12SAR1 Gulf Red Grouper Completev2.pdf
Red Grouper	Epinephelus morio	SEDAR. (2010). SEDAR 19 Stock Assessment Report South Atlantic Red Grouper. SEDAR. North Charleston, SC. Retrieved from http://sedarweb.org/docs/sar/Red_grouper_SAR_FINAL.pdf
Red Grouper	Epinephelus morio	SEDAR. (2015). SEDAR 42 - Gulf of Mexico Red Grouper, (October). Retrieved from http://www.cio.noaa.gov/services_programs/prplans/pdfs/ID311_SEDAR42_Gulf_of_Mexico_Red_Grouper_FINAL.pdf
Red Grouper	Epinephelus morio	SEDAR. (2015). SEDAR 42 Gulf of Mexico Red Grouper Stock Assessment Report. SEDAR. North Charleston, SC. Retrieved from http://sedarweb.org/docs/sar/S42_SAR_0.pdf
Red Grouper	Epinephelus morio	Stiles, T. C., & Burton, M. L. (2015). Age,growth, and mortality of red grouper, Epinephelus morio, from the Southeastern U.S. SEDAR 42-RD-03. SEDAR. North Charleston, SC. Retrieved from http://aquaticcommons.org/14882/1/Stiles.PDF
Red Grouper	Epinephelus morio	Vaughan, D. S., & Burton, M. L. (1994). Estimation of von Bertalanffy growth parameters in the presence of size-selective mortality: a simulated example with red grouper. Transactions of the American Fisheries Society., 123, 1–8. http://doi.org/10.1577/1548-8659(1994)123<0001:EOVBGP>2.3.CO;2
Red Grouper	Epinephelus morio	Wall, C. C. (2012). Shelf-scale Mapping of Fish Distribution Using Active and Passive Acoustics. Ph.D. Dissertation. University of South Florida. Retrieved from http://scholarcommons.usf.edu/etd/4251/
Red Grouper	Epinephelus morio	Wall, C. C., Donahue, B. T., Naar, D. F., & Mann, D. A. (2011). Spatial and temporal variability of red grouper holes within Steamboat Lumps Marine Reserve, Gulf of Mexico. Marine Ecology Progress Series, 431(1), 243–254. http://doi.org/10.3354/meps09167
Red Snapper	Lutjanus campechanus	Allman, R. J., Fitzhugh, G. R., & Fable, W. (2002). Report of red snapper otolith aging; 2000 data summary. Panama City Laboratory.
Red Snapper	Lutjanus campechanus	Allman, R. J., Fitzhugh, G. R., Starzinger, K. J., & Farsky, R. A. (2005). Precision of age estimation in red snapper (Lutjanus campechanus). Fisheries Research, 73(1–2), 123–133. http://doi.org/10.1016/j.fishres.2004.12.012
Red Snapper	Lutjanus campechanus	Arnold, C. R., Wakeman, J. M., Williams, T. D., & Treece, G. D. (1978). Spawning of red snapper (Lutjanus campechanus) in captivity. Aquaculture, 15(3), 301–303. http://doi.org/10.1016/0044-8486(78)90040-6
Red Snapper	Lutjanus campechanus	Arreguín-sánchez, F., Munro, J. L., Balgos, M. C., & Pauly, D. (Eds.). (1996). Biology, Fisheries, and Culture of Tropical Groupers and Snappers. International Center for Living Aquatic Resources Management. Retrieved from http://pubs.iclarm.net/libinfo/Pdf/Pub CP6 48.pdf
Red Snapper	Lutjanus campechanus	Baker, M. S., & Wilson, C. a. (2001). Use of bomb radiocarbon to validate otolith section ages of red snapper Lutjanus campechanus from the northern Gulf of Mexico. Limnology and Oceanography, 46(7), 1819–1824. http://doi.org/10.4319/lo.2001.46.7.1819
Red Snapper	Lutjanus campechanus	Bradley, E., & Bryan, C. E. (1975). Life history and fishery of the red snapper (Lutjanus campechanus) in the Northwestern Gulf of Mexico 1970-1974. Proc Gulf Caribb Fish Inst, (27), 77–106. Retrieved from http://aquaticcommons.org/12176/1/gcfi_27-21.pdf
Red Snapper	Lutjanus campechanus	Brulé, T., Colás-Marrufo, T., Pérez-Díaz, E., & Sámano-Zapata, J. C. (2010). Red snapper reproductive biology in the southern Gulf of Mexico. Transactions of the American Fisheries Society, 139(4), 957–968. http://doi.org/10.1577/T09-125.1
Red Snapper	Lutjanus campechanus	Burns, K. M., Brown-Peterson, N. J., & M, O. R. (2006). Geographic comparison of age, growth, reproduction, movement, and survival of red snapper off the state of Florida. Sedar24-RD09.
Red Snapper	Lutjanus campechanus	Cass-Calay, S. L., Porch, C. E., Goethel, D. R., Smith, M. W., Matter, V., & Mccarthy, K. J. (2015). Stock Assessment of Red Snapper in the Gulf of Mexico 1872 – 2013 -With Provisional 2014 Landings. SEDAR Update Assessment, 242. Retrieved from http://sedarweb.org/docs/suar/SEDARUpdateRedSnapper2014_FINAL_9.15.2015.pdf
Red Snapper	Lutjanus campechanus	Coleman, F. C., Scanlon, K. M., & Koenig, C. C. (2011). Groupers on the edge: shelf edge spawning habitat in and around marine reserves of the Northeastern Gulf of Mexico. Professional Geographer, 63(4), 456–474. http://doi.org/10.1080/00330124.2011.585076
Red Snapper	Lutjanus campechanus	Collins, L. A., Johnson, A. G., & Kein, C. P. (1996). Spawning and annual fecundity of the red snapper (Lutjanus campechanus) form the northeastern Gulf of Mexico. In F. Arreguín-Sánchez, M. C. Balgos, & D. Pauly (Eds.), Biology, Fisheries and Culture of Tropical Groupers and Snappers (pp. 174–188).
Red Snapper	Lutjanus campechanus	Conn, P., Shertzer, K., & Williams, E. (2007). Sedar 15 AW 01 Statistical catch-at-age model. SEDAR. Center for Coastal Fisheries and Habitat Research. Beaufort, NC. Retrieved from http://sedarweb.org/docs/wpapers/SEDAR 15-AW01.pdf
Red Snapper	Lutjanus campechanus	Cowan Jr, J. H., Boswell, K. M., Simonsen, K. A., Saari, C. R., & Kulaw, D. (2012). SEDAR31-DW03 Working paper for red snapper data workshop. North Charleston, SC: SEDAR. Retrieved from http://sedarweb.org/docs/wpapers/SEDAR31-DW03- Cowan et al. SEDAR 31 DW Working Paper.pdf
Red Snapper	Lutjanus campechanus	Cowan, J. H. (2011). Red snapper in the Gulf of Mexico and U.S. South Atlantic: data, doubt, and debate. Fisheries, 36(7), 319–331. http://doi.org/10.1080/03632415.2011.589318
Red Snapper	Lutjanus campechanus	Davis, W. T., Drymon, J. M., & Powers, S. P. (2015). Spatial and dietary overlap creates potential for competition between red snapper (Lutjanus campechanus) and Vermilion snapper (Rhomboplites aurorubens). PloS One, 10(12), 1–16. http://doi.org/10.1371/journal.pone.0144051
Red Snapper	Lutjanus campechanus	Fable, W. A. (1980). Tagging studies of red snapper (Lutjanus campechanus) and vermilion snapper (Rhomboplites aurorubens) off the south Texas coast. Contributions in Marine Science, 23(AUG), 115–121. Retrieved from http://agris.fao.org/agris-search/search.do?recordID=US19820738918
Red Snapper	Lutjanus campechanus	Farmer, N. A., Malinowski, R. P., McGovern, M. F., & Rubec, P. J. (2016). Stock complexes for fisheries management in the Gulf of Mexico. Marine and Coastal Fisheries, 8(1), 177–201. http://doi.org/10.1080/19425120.2015.1024359
Red Snapper	Lutjanus campechanus	Fischer, A. J., Baker, M. S., & Wilson, C. A. (2004). Red snapper (Lutjanus campechanus) demographic structure in the northern Gulf of Mexico based on spatial patterns in growth rates and morphometrics. Fisheries Bulletin, 102(4), 593–603. Retrieved from http://fishbull.noaa.gov/1024/fisch.pdf
Red Snapper	Lutjanus campechanus	Gallaway, B. J., Szedlmayer, S. T., & Gazey, W. J. (2009). A life history review for red snapper in the Gulf of Mexico with an evaluation of the importance of offshore petroleum platforms and other artificial reefs. Reviews in Fisheries Science, 17(1), 48–67. http://doi.org/10.1080/10641260802160717
Red Snapper	Lutjanus campechanus	Gillig, D., Ozuna Jr., T., & Griffin, W. L. (2000). The value of the Gulf of Mexico recreational red snapper fishery. Marine Resource Economics, 15(2), 127–139. http://doi.org/10.1086/mre.15.2.42629296
Red Snapper	Lutjanus campechanus	Gold, J. R., Sun, F., & Richardson, L. R. (1997). Population structure of red snapper from the Gulf of Mexico as inferred from analysis of mitochondrial DNA. Transactions of the American Fisheries Society, 126(3), 386–396. http://doi.org/10.1577/1548-8659(1997)126
Red Snapper	Lutjanus campechanus	Goodyear, C. P. (1995). Red snapper in US waters of the Gulf of Mexico. Southeast Fisheries Science Center. Miami, FL. Retrieved from https://www.researchgate.net/publication/265208710_Red_Snapper_in_US_Waters_of_the_Gulf_of_Mexico
Red Snapper	Lutjanus campechanus	Hernandez, A., & Seijo, J. C. (2003). Spatial distribution analysis of red grouper (Epinephelus morio) fishery in Yucatan, Mexico. Fisheries Research, 63(1), 135–141. http://doi.org/10.1016/S0165-7836(03)00039-0
Red Snapper	Lutjanus campechanus	Jackson, M. W., Nieland, D. L., & Cowan, J. H. (2006). Diel spawning periodicity of red snapper Lutjanus campechanus in the northern Gulf of Mexico. Journal of Fish Biology, 68(3), 695–706. http://doi.org/10.1111/j.0022-1112.2006.00951.x
Red Snapper	Lutjanus campechanus	Koenig, C. C., & Coleman, F. C. (2013). Protection of grouper and red snapper spawning in shelf-edge marine reserves of the Northeastern Gulf of Mexico: demographics, movements, survival and spilllover effects: SEDAR 33. SEDAR (Vol. 33). North Charleston, SC. Retrieved from http://sedarweb.org/docs/wpapers/SEDAR33-DW02- Koenig and Coleman 2011 Protection of spawning stock in reserves- demo%2C mov…
Red Snapper	Lutjanus campechanus	Kulaw, D. (2012). Habitat-and region-specific reproductive biology of female Red Snapper (Lutjanus campechanus) in the Gulf of Mexico. M.S. Thesis. Louisiana State University. Retrieved from http://nsgl.gso.uri.edu/lsu/lsuy12014.pdf
Red Snapper	Lutjanus campechanus	Louisiana State University. (2016). Louisiana Fisheries: Red Snapper FAQ. Retrieved from http://www.lsu.edu/seagrantfish/faqs/redsnapper/biology.htm
Red Snapper	Lutjanus campechanus	Lowerre-Barbieri, S., Crabtree, L., Switzer, T., Burnsed, S. W., & Guenther, C. (2015). Assessing reproductive resilience: an example with South Atlantic red snapper Lutjanus campechanus. Marine Ecology Progress Series, 526, 125. http://doi.org/10.3354/meps11212
Red Snapper	Lutjanus campechanus	McInerny, S. A. (2007). Age and growth of red snapper, Lutjanus campechanus, from the southeastern United States. University of North Carolina Wilmington.
Red Snapper	Lutjanus campechanus	Minton, R. V., Hawke, J. P., & Tatum, W. M. (1983). Hormone induced spawning of red snapper, Lutjanus campechanus. Aquaculture, 30(1–4), 363–368. http://doi.org/10.1016/0044-8486(83)90177-1
Red Snapper	Lutjanus campechanus	Monroy-Garcia, M. D. C., Burgos Rosas, R., & de la Rosa, M. E. G. (1996). Analysis of catch-per-effort data for red snapper on Campeche Bank in 1992. In F. Arreguín-Sánchez, J. L. Munro, M. C. Balgos, & D. Pauly (Eds.), Biology, fisheries and culture of tropical groupers and snappers (pp. 350–354). Retrieved from http://pubs.iclarm.net/libinfo/Pdf/Pub CP6 48.pdf
Red Snapper	Lutjanus campechanus	Moseley, F. N. (1966). Biology Of The Red Snapper, Lutjanus Aya Bloch, Of The Northwestern Gulf Of Mexico. Texas A & M University. Retrieved from https://repositories.tdl.org/tamug-ir/handle/1969.3/19090
Red Snapper	Lutjanus campechanus	Nelson, R. S., & Manooch, C. S. (1982). Growth and mortality of red snappers in the West-Central Atlantic Ocean and Northern Gulf of Mexico. Transactions of the American Fisheries Society, 111(4), 465–475. http://doi.org/10.1577/1548-8659(1982)111
Red Snapper	Lutjanus campechanus	Patterson III, W. F. (1999). Aspects of the population ecology of red snapper <i>Lutjanus campechanus<i/> in an artificial reef area off Alabama. University of South Alabama.
Red Snapper	Lutjanus campechanus	Patterson III, W. F., & Cowan, J. H. (2003). Site fidelity and dispersion of red snapper associated with artificial reefs in the Northern Gulf of Mexico. American Fisheries Society Symposium, 36, 181–193. Retrieved from http://sedarweb.org/docs/wsupp/SEDAR7_REF10.pdf
Red Snapper	Lutjanus campechanus	Patterson III, W. F., Cowan, J. H., Wilson, C. A., & Shipp, R. L. (2001). Age and growth of red snapper (Lutjanus campechanus) from an artificial reef area off Alabama in the northern Gulf of Mexico. Fisheries Bulletin, 99, 617–627. Retrieved from http://fishbull.noaa.gov/994/pat.pdf
Red Snapper	Lutjanus campechanus	Patterson, W. F., Watterson, J. C., Shipp, R. L., & Cowan, J. H. (2001). Movement of tagged red snapper in the Northern Gulf of Mexico. Transactions of the American Fisheries Society, 130(4), 533–545. http://doi.org/10.1577/1548-8659(2001)130
Red Snapper	Lutjanus campechanus	Phelps, R. P., Papanikos, N., Bourque, B. D., Bueno, F. T., Hastey, R. P., Maus, D. L., … Davis, D. A. (2009). Spawning red snapper (Lutjanus campechanus) in response to hormonal induction or environmental control in a hatchery setting. Reviews in Fisheries Science, 17(2), 149–155. http://doi.org/10.1080/10641260802505689
Red Snapper	Lutjanus campechanus	Porch, C. E., Fitzhugh, G. R., Lang, E. T., Lyon, H. M., & Linton, B. C. (2015). Estimating the dependence of spawning frequency on size and age in Gulf of Mexico red snapper. Marine and Coastal Fisheries, 7(1), 233–245. http://doi.org/10.1080/19425120.2015.1040567
Red Snapper	Lutjanus campechanus	Render, J. H. (1995). The life history (age, growth and reproduction) of red snapper (Lutjanus campechanus) and its affinity for oil and gas platforms.
Red Snapper	Lutjanus campechanus	Render, J. H., & Wilson, C. A. (1994). Hook-and-line mortality of caught and released red snapper around oil and gas platform structural habitat. Bulletin of Marine Science, 55(2–3), 1106–1111. Retrieved from http://www.ingentaconnect.com/contentone/umrsmas/bullmar/1994/00000055/F0020002/art00067?crawler=true
Red Snapper	Lutjanus campechanus	Rindone, R. R., Kellison, G. T., & Bortone, S. a. (2015). Data Availability for Red Snapper in Gulf of Mexico and Southeastern U.S. Atlantic Ocean Waters. North American Journal of Fisheries Management, 35(2), 191–204. http://doi.org/10.1080/02755947.2014.992559
Red Snapper	Lutjanus campechanus	Rudershausen, P. J., Williams, E. H., Buckel, J. A., Potts, J. C., & Manooch, C. S. (2008). Comparison of reef fish catch per unit effort and total mortality between the 1970s and 2005-2006 in Onslow Bay, North Carolina. Transactions of the American Fisheries Society, 137(5), 1389–1405. http://doi.org/10.1577/T07-159.1
Red Snapper	Lutjanus campechanus	Saari, C. R., Cowan Jr., J. H., & Boswell, K. M. (2014). Regional differences in the age and growth of red snapper (Lutjanus campechanus) in the U.S. Gulf of Mexico. Fishery Bulletin, 112(4), 261–273. http://doi.org/10.7755/FB.112.4.3
Red Snapper	Lutjanus campechanus	Saillant, E., & Gold, J. R. (2006). Population structure and variance effective size of red snapper (Lutjanus campechanus) in the northern Gulf of Mexico. Fisheries Bulletin2, 104, 136–148. Retrieved from http://aquaticcommons.org/9013/1/saillant.pdf
Red Snapper	Lutjanus campechanus	Schroepfer, R. L., & Szedlmayer, S. T. (2006). Estimates of residence and site fidelity of red snapper (Lutjanus Campechanus) on artificial reefs in the Northeastern Gulf Of Mexico. Bulletin of Marine Science, 78(1), 93–101. Retrieved from http://www.ingentaconnect.com/content/umrsmas/bullmar/2006/00000078/00000001/art00009
Red Snapper	Lutjanus campechanus	SEDAR. (2005). SEDAR 7 Gulf of Mexico Red Snapper. SEDAR, (SAR 1), 24. Retrieved from http://sedarweb.org/docs/sar/S7SAR_FINAL-redsnapper.pdf
Red Snapper	Lutjanus campechanus	SEDAR. (2009). SEDAR 15: Stock Assessment Report 1 - South Atlantic Red Snapper (Vol. 1). SEDAR, North Charleston, SC. Retrieved from http://sedarweb.org/sedar-15
Red Snapper	Lutjanus campechanus	SEDAR. (2010). SEDAR 24 Stock Assessment Report South Atlantic Red Snapper. SEDAR. North Charleston, SC. Retrieved from http://sedarweb.org/docs/sar/SEDAR 24_SARRedSnap_Final.pdf
Red Snapper	Lutjanus campechanus	SEDAR. (2013). Sedar 31 Gulf of mexico red snapper Stock Assessment Report. SEDAR. North Charleston, SC. Retrieved from http://www.sefsc.noaa.gov/sedar/Sedar_Workshops.jsp?WorkshopNum=31
Red Snapper	Lutjanus campechanus	Szedlmayer, S. T. (1997). Ultrasonic telemetry of red snapper, Lutjanus campechanus, at artificial reef sites in the Northeast Gulf of Mexico. Copeia, 1997(4), 846–850. http://doi.org/10.2307/1447304
Red Snapper	Lutjanus campechanus	Szedlmayer, S. T., & Shipp, R. L. (1994). Movement and growth of red snapper (Lutjanus campechanus) from an artificial reef area in the northeastern Gulf of Mexico. Bulletin of Marine Science, 55(2–3), 887–896. Retrieved from http://www.ingentaconnect.com/content/umrsmas/bullmar/1994/00000055/f0020002/art00049
Red Snapper	Lutjanus campechanus	Szedlmayer, S. T., Moss, D., & Maceina, M. (2005). Fishery independent survey of red snapper Lutjanus campechanus in the Gulf of Mexico. Department of Fisheries and Allied Aquaculture. Auburn University. Retrieved from http://sedarweb.org/docs/wpapers/SEDAR7_DW21.pdf
Red Snapper	Lutjanus campechanus	Wells, R. J. D., Boswell, K. M., Cowan, J. H., & Patterson, W. F. (2008). Size selectivity of sampling gears targeting red snapper in the northern Gulf of Mexico. Fisheries Research, 89(3), 294–299. http://doi.org/10.1016/j.fishres.2007.10.010
Red Snapper	Lutjanus campechanus	Wells, R. J. D., Cowan, J. H., & Fry, B. (2008). Feeding ecology of red snapper Lutjanus campechanus in the northern Gulf of Mexico. Marine Ecology Progress Series, 361, 213–225. http://doi.org/10.3354/meps07425
Red Snapper	Lutjanus campechanus	White, D. B., & Palmer, S. M. (2004). Age , Growth , and Reproduction of the Red Snapper , Lutjanus campechanus, from the Atlantic Waters of the southeastern U.S. Bulletin of Marine Science, 75(December 2015), 335–360.
Red Snapper	Lutjanus campechanus	Wilson, C. A., & Nieland, D. L. (2001). Age and growth of red snapper, Lutjanus campechanus, from the northern Gulf of Mexico off Louisiana. Fishery Bulletin, 99, 653–664. Retrieved from http://fishbull.noaa.gov/994/wil.pdf
Red Snapper	Lutjanus campechanus	Woods, M. K., Fischer, A. J., Cowan, J. H., & Nieland, D. L. (2003). Size and age at maturity of female red snapper (Lutjanus campechanus) in the northern Gulf of Mexico. Gulf & Caribbean Fisheries Institute, 54, 526–537. Retrieved from http://aquaticcommons.org/13585/1/gcfi_54-44.pdf
Scamp	Mycteroperca phenax	Coleman, F. C., Koenig, C. C., & Collins, L. A. (1996). Reproductive styles of shallow-water groupers (Pisces: Serranidae) in the eastern Gulf of Mexico and the consequences of fishing spawning aggregations. Environmental Biology of Fishes, 47(47), 129–141. http://doi.org/10.1007/BF00005035
Scamp	Mycteroperca phenax	Coleman, F. C., Scanlon, K. M., & Koenig, C. C. (2011). Groupers on the edge: shelf edge spawning habitat in and around marine reserves of the Northeastern Gulf of Mexico. Professional Geographer, 63(4), 456–474. http://doi.org/10.1080/00330124.2011.585076
Scamp	Mycteroperca phenax	Farmer, N. A., Malinowski, R. P., McGovern, M. F., & Rubec, P. J. (2016). Stock complexes for fisheries management in the Gulf of Mexico. Marine and Coastal Fisheries, 8(1), 177–201. http://doi.org/10.1080/19425120.2015.1024359
Scamp	Mycteroperca phenax	Gilmore, R. G., & Jones, R. S. (1992). Color Variation and Associated Behavior in the Epinepheline Groupers, Mycteroperca microlepis (Goode and Bean) and M. phenax (Jordan and Swain). Bulletin of Marine Science, 51(1), 83–103. Retrieved from http://www.ingentaconnect.com/content/umrsmas/bullmar/1992/00000051/00000001/art00009
Scamp	Mycteroperca phenax	Harris, P. J., Wyanski, D. M., White, D. B., & Moore, J. L. (2002). Age, growth, and reproduction of scamp, mycteroperca phenax, in the southwestern north atlantic, 1979-1997. Bulletin of Marine Science, 70(1), 113–132. Retrieved from http://www.ingentaconnect.com/content/umrsmas/bullmar/2002/00000070/00000001/art00009
Scamp	Mycteroperca phenax	Heemstra, P. C., & Randall, J. E. (1993). FAO species catalogue vol. 16 groupers of the world (family serranidae, subfamily epinephelinae): An annotated and illustrated catalogue of the grouper, …. Food and Agriculture Organization of the United Nations. Retrieved from http://afrilib.odinafrica.org/handle/0/15799
Scamp	Mycteroperca phenax	Lombardi-Carlson, L. A., Cook, M., Lyon, H., Barnett, B., & Bullock, L. (2012). A Description of Age, Growth, and Reproductive Life History Traits of Scamps from the Northern Gulf of Mexico. Marine and Coastal Fisheries, 4(1), 129. http://doi.org/10.1080/19425120.2012.675965
Scamp	Mycteroperca phenax	Manooch III, C. S., Potts, J., Burton, M. L., & Harris, P. J. (1998). Population Assessment of the Scamp, Mycteroperca phenax, from the Southeastern United States. NOAA Technical Memorandum. Beaufort, NC. Retrieved from http://docs.lib.noaa.gov/noaa_documents/NMFS/SEFSC/TM_NMFS_SEFSC/NMFS_SEFSC_TM_410.pdf
Scamp	Mycteroperca phenax	Matheson, R. H., Huntsman, G. R., & Manooch III, C. S. (1986). Age, Growth, Mortality, Food And Reproduction Of The Scamp, Mycteroperca phenax, Collected Off North Carolina And South Carolina. Bulletin of Marine Science, 38(2), 300–312. Retrieved from http://www.ingentaconnect.com/contentone/umrsmas/bullmar/1986/00000038/00000002/art00004?crawler=true
Scamp	Mycteroperca phenax	Stephen, J. A., Harris, P. J., & Reichert, M. J. M. (2011). Comparison of life history parameters for landed and discarded fish captured off the southeastern United States. Fishery Bulletin, 109(1), 292–304. Retrieved from http://fishbull.noaa.gov/1093/stephen.pdf
Sheepshead	Archosargus probatocephalus	Ballenger, J. C. (2011). Population dynamics of sheepshead (Archosargus probatocephalus) in the Chesapeake Bay region: A comparison to other areas and an assessment of their current status. Old Dominion University.
Sheepshead	Archosargus probatocephalus	Beckman, D. W., Stanley, A. L., Render, J. H., & Wilson, C. A. (1991). Age and growth-rate estimation of sheepshead Archosargus probatocephalus in Louisiana waters using otoliths. Fishery Bulletin, 89(1), 1–8. Retrieved from http://fishbull.noaa.gov/891/beckman.pdf
Sheepshead	Archosargus probatocephalus	Bell, M., & McDonough, C. (2015). Sheepshead Archosargus probatocephalus. Supplemental Volume: Species of Conservation Concern. South Carolina Department of Natural Resources, Charleston, South Carolina.
Sheepshead	Archosargus probatocephalus	Brown-Peterson, N. J., Warren, J. R., Dempster, W., Gray, G., & Tilley, J. (2005). Reproduction, age and growth of sheepshead, Archosargus probatocephalus, in Mississippi waters. ASIH poster, Tampa, FL.
Sheepshead	Archosargus probatocephalus	Dtuka-Gianelli, J., & Murie, D. J. (2001). Age and growth of sheepshead, Archosargus probatocephalus (Pisces: Sparidae), from the Northwest coast of Florida. Bulletin of Marine Science, 68(1), 69–83.
Sheepshead	Archosargus probatocephalus	Jennings, C. A. (1985). Species profiles: life histories and environmental requirements of coastal fishes and invertebrates (Gulf of Mexico)-Sheepshead (Archsargus probatocephalus). U.S. Fish Wildl. Serv. Biol. Rep., 10. Retrieved from http://www.osti.gov/scitech/biblio/5412042
Sheepshead	Archosargus probatocephalus	Jordan, D. S., & Evermann, B. W. (1896). The fishes of north and middle america. Bulletin of the United States National Museum (Vol. 53). Washington D.C. http://doi.org/10.1017/CBO9781107415324.004
Sheepshead	Archosargus probatocephalus	McDonough, C. J., Wenner, C. A., & Roumillat, W. A. (2011). Age, Growth, and Reproduction of Sheepsheads in South Carolina. Marine and Coastal Fisheries, 3(1), 366. http://doi.org/10.1080/19425120.2011.632234
Sheepshead	Archosargus probatocephalus	Munyandorero, J., Murphy, M. D., & MacDonald, T. C. (2006). An assessment of the status of sheepshead in Florida waters through 2004. Florida Department of Natural Resources. St. Petersburg, FL. Retrieved from https://sjrda.unf.edu/items/view/sjrda:465
Sheepshead	Archosargus probatocephalus	Murphy, M., & MacDonald, T. (2000). An assessment of the status of sheepshead in Florida water through 1999. Florida Marine Research Institute. St. Petersburg, FL.
Sheepshead	Archosargus probatocephalus	Murphy, M., Mahmoudi, B., & Muller, R. G. (1997). A stock assessment of sheepshead. Report from the Florida Marine Research Institute. St. Petersburg FL, Florida Marine Fisheries Commission.
Sheepshead	Archosargus probatocephalus	Music, J., & Pafford, J. (1984). Population dynamics and life history aspects of major marine sportfishes in Georgia’s coast waters. Brunswick, GA. Retrieved from https://www.gpo.gov/fdsys/pkg/CZIC-ql628-g4-m8-1984-no-38/pdf/CZIC-ql628-g4-m8-1984-no-38.pdf
Sheepshead	Archosargus probatocephalus	Render, J. H., & Wilson, C. A. (1992). Reproductive biology of Sheepshead in the Northern Gulf of Mexico. Transactions of the American Fisheries Society, 121, 757–764. Retrieved from http://www.tandfonline.com/doi/abs/10.1577/1548-8659(1992)121%3C0757%3ARBOSIT%3E2.3.CO%3B2
Sheepshead	Archosargus probatocephalus	Schexnayder, M., Render, J., Pausina, R., & McManus, B. (1996). A biological and fisheries profile for Sheepshead, Archosargus probatocephalus, in Louisiana. Batron Rouge, LA: LA Department of Wildlife and Fisheries.
Sheepshead	Archosargus probatocephalus	Schwartz, F. J. (1990). Length-weight, Age, and Growth, and Landings Observations for Sheepshead Archosargus probatocephalus from Noth Carolina. Fishery Bulletin, 88(June), 829–832.
Sheepshead	Archosargus probatocephalus	Springer, V. G., & Woodburn, K. D. (1960). An ecological study of the fishes of the Tampa Bay area. Professional Papers Series, 1. Retrieved from http://www.nativefishlab.net/library/textpdf/11938.pdf
Sheepshead	Archosargus probatocephalus	Swingle, H. (1977). Coastal fishery resources of Alabama. Alabama Marine Research, 12, 31–58.
Sheepshead	Archosargus probatocephalus	Tucker Jr, J. W., & Alshuth, S. R. (1997). Development of laboratory-reared sheepshead, Archosargus probatocephalus (Pisces: Sparidae)*. Fisheries Bulletin, 95, 394–401.
Sheepshead	Archosargus probatocephalus	Tucker JR, J. W., Barbera, P. A., & Tucker, J. W. (1987). Laboratory Spawning of Sheepshead Laboratory Spawning of Sheepshead Harbor Branch Oceanographic Institution 5600 Old Dixie Highway. The Progressive Fish-Culturist, 493(49). http://doi.org/10.1577/1548-8640(1987)49<229:LSOS>2.0.CO;2doi.org/10.1577/1548-8640(1987)49<229:LSOS>2.0.CO;2
Sheepshead	Archosargus probatocephalus	VanderKooy, S. (2006). Sheepshead fisheries profile. Gulf States Marine Fisheries Commission, (143). Retrieved from http://www.gsmfc.org/publications/GSMFC Number 143.pdf
Sheepshead	Archosargus probatocephalus	Wenner, C. (1996). Age and growth of sheepshead, Archosargus probatocephalus, from South Carolina water with some preliminary management concepts. Charleston, SC.
Sheepshead	Archosargus probatocephalus	Willson, C. A., Render, J. H., Beckman, D. W., & Stanley, A. L. (1988). The age structure and reproductive biology of sheepshead (Archosargus probatocephalus) landed in Louisiana. Louisiana Board of Regents’ Rockefeller Fund Interest Earnings Grant Program.
Snowy Grouper	Epinephelus niveatus	Epperly, S. P., & Dodrill, J. W. (1995). Catch rates of snowy grouper, Epinephelus niveatus, on the deep reefs of Onslow Bay, southeastern USA. Bulletin of Marine Science, 56(2), 450–461. Retrieved from http://www.ingentaconnect.com/content/umrsmas/bullmar/1995/00000056/00000002/art00005
Snowy Grouper	Epinephelus niveatus	Farmer, N. A., Malinowski, R. P., McGovern, M. F., & Rubec, P. J. (2016). Stock complexes for fisheries management in the Gulf of Mexico. Marine and Coastal Fisheries, 8(1), 177–201. http://doi.org/10.1080/19425120.2015.1024359
Snowy Grouper	Epinephelus niveatus	Jones, R. S., Gutherz, E. J., Nelson, W. R., & Matlock, G. C. (1989). Burrow utilization by yellowedge grouper, Epinephelus flavolimbatus, in the northwestern Gulf of Mexico. Environmental Biology of Fishes, 26(4), 277–284. http://doi.org/10.1007/BF00002464
Snowy Grouper	Epinephelus niveatus	Kowal, K., Kelley Kowal, by D., Professor, M., Daly, K., Cody, R., Muller, R., & Peebles, E. (2010). Aspects of the Life History of the Snowy Grouper, Epinephelus niveatus, in the Gulf of Mexico. Retrieved from http://scholarcommons.usf.edu/etd
Snowy Grouper	Epinephelus niveatus	Matheson, R. H., & Huntsman, G. R. (1984). Growth, Mortality, and Yield-per-Recruit Models for Speckled Hind and Snowy Grouper from the United States South Atlantic Bight. Transactions of the American Fisheries Society, 113(5), 607–616. Retrieved from http://www.tandfonline.com/doi/abs/10.1577/1548-8659(1984)113%3C607%3AGMAYMF%3E2.0.CO%3B2#.Vz4PR5ErLcs
Snowy Grouper	Epinephelus niveatus	Moore, C. M., & Labisky, R. F. (1984). Population Parameters of a Relatively Unexploited Stock of Snowy Grouper in the Lower Florida Keys. Transactions of the American Fisheries Society, 113(3), 322–329. Retrieved from http://www.tandfonline.com/doi/abs/10.1577/1548-8659(1984)113%3C322%3APPOARU%3E2.0.CO%3B2#.Vz4PXpErLcs
Snowy Grouper	Epinephelus niveatus	Noaa. (2005). Stock Assessment and Fishery Evaluation Report for the Snapper Grouper Fishery of the South Atlantic November 18, 2005. South Atlantic Fishery Management Council. Retrieved from http://sero.nmfs.noaa.gov/sustainable_fisheries/safe_reports/documents/pdfs/snapper_grouper_2005_safe.pdf
Snowy Grouper	Epinephelus niveatus	Pante, E. (2005). Aspects of the Life History of Snowy Grouper Epinephelus niveatus Related to its Fisheries and Conservation. Ecology and Fisheries of the Snowy Grouper, MPA Seminar.
Snowy Grouper	Epinephelus niveatus	Potts, J. C., & Brennan, K. (2001). Trends in catch data and estimated static SPR values for fifteen species of reef fish landed along the Southeastern United States. South Atlantic Fishery Management Council, Charleston, SC.
Snowy Grouper	Epinephelus niveatus	Rudershausen, P. J., Williams, E. H., Buckel, J. A., Potts, J. C., & Manooch, C. S. (2008). Comparison of reef fish catch per unit effort and total mortality between the 1970s and 2005-2006 in Onslow Bay, North Carolina. Transactions of the American Fisheries Society, 137(5), 1389–1405. http://doi.org/10.1577/T07-159.1
Snowy Grouper	Epinephelus niveatus	SEDAR. (2004). SEDAR 4- Stock Assessment of the Deepwater Snapper / Grouper Complex in the South Atlantic. SEDAR. North Charleston, SC. Retrieved from http://safmc.net/Portals/6/Meetings/Council/BriefingBook/June2007/SSCComm/SEDAR4-FinalSAR.pdf
Snowy Grouper	Epinephelus niveatus	SEDAR. (2014). SEDAR 36 South Atlantic Snowy Grouper. SEDAR. North Charleston, SC. Retrieved from http://sedarweb.org/docs/sar/S36_Std_SA_SnowyGrouper_SAR_Final_1.10.2014.pdf
Snowy Grouper	Epinephelus niveatus	Sedar. (2016). Sedar 49 Gulf of Mexico Data-limited Species : red drum, lane snapper, wenchman, yellowmouth grouper, speckled hind, snowy grouper, almaco jack, lesser amberjack. North Charleston, SC.
Snowy Grouper	Epinephelus niveatus	Smith, C. L. (1971). A revision of the American Groupers: Epinephelus and allied genera. New York, NY: American Museum of Natural History. Retrieved from http://digitallibrary.amnh.org/handle/2246/1166?show=full
Snowy Grouper	Epinephelus niveatus	Wyanski, D. M., & White, D. B. (2000). Growth, population age structure, and aspects of the reproductive biology of snowy grouper, Epinephelus niveatus, off North Carolina and South Carolina. Fishery Bulletin, 98, 199–218. Retrieved from http://dc.statelibrary.sc.gov/handle/10827/10557
Snowy Grouper	Epinephelus niveatus	Wyanski, D. M., White, D. B., Kolmos, K. J., & Mikell, P. P. (2013). Marine Resources Monitoring , Assessment and Prediction Program : Report on the Status of the Life History of Snowy Grouper , Hyporthodus niveatus , for the SEDAR36-WP-08. North Charleston, SC.
Southern Flounder	Paralichthys lethostigma	Anderson, J. D., Karel, W. J., & Mione, A. C. S. (2012). Population Structure and Evolutionary History of Southern Flounder in the Gulf of Mexico and Western Atlantic Ocean. Transactions of the American Fisheries Society, 141(1), 46–55. http://doi.org/10.1080/00028487.2011.651070
Southern Flounder	Paralichthys lethostigma	Blanchet, H. (2010). Assessment of southern flounder in Louisiana waters.
Southern Flounder	Paralichthys lethostigma	Blandon, I. R., Ward, R., King, T. L., Karel, W. J., & Monaghan Jr, J. P. (2001). Preliminary genetic population structure of southern flounder, Paralichthys lethostigma, along the Atlantic Coast and Gulf of Mexico. Fishery Bulletin, (99), 671–678. Retrieved from http://fishbull.noaa.gov/994/bla.pdf
Southern Flounder	Paralichthys lethostigma	Corey, M. M. (2016). Growth and Reproduction of Southern Flounder (Paralichthys lethostigma) in the North-Central Gulf of Mexico. University of Southern Mississippi. Retrieved from http://aquila.usm.edu/cgi/viewcontent.cgi?article=1224&context=masters_theses
Southern Flounder	Paralichthys lethostigma	Etzold, D., & Christmas, J. (1979). No TitleA Mississippi marine finfish management plan. Ocean Springs, MS: Mississippi-Alabama Sea Grant Consortium.
Southern Flounder	Paralichthys lethostigma	Fischer, A. J., & Thompson, B. A. (2004). The age and growth of southern flounder, Paralichthys lethostigma, from Louisiana estaurine and offshore waters. Bulletin of Marine Science, 75(1), 63–77. Retrieved from http://www.ingentaconnect.com/content/umrsmas/bullmar/2004/00000075/00000001/art00006
Southern Flounder	Paralichthys lethostigma	Frick, M. (1988). Age a growth of Southern Flounder in the northern Gulf of Mexico. Auburn University.
Southern Flounder	Paralichthys lethostigma	Froeschke, B. F., Robillard, M. M. R., & Stunz, G. W. (2016). Spatial Biodiversity Patterns of Fish Within the Aransas Bay. Gulf and Caribbean Research, 27, 21–32. http://doi.org/10.18785/gcr.2701.03
Southern Flounder	Paralichthys lethostigma	Froeschke, B. F., Sterba-Boatwright, B., & Stunz, G. W. (2011). Assessing southern flounder (Paralichthys lethostigma) long-term population trends in the northern Gulf of Mexico using time series analyses. Fisheries Research, 108(2–3), 291–298. http://doi.org/10.1016/j.fishres.2010.12.023
Southern Flounder	Paralichthys lethostigma	Froeschke, J. T., & Froeschke, B. F. (2016). Two-Stage Boosted Regression Tree Model to Characterize Southern Flounder Distribution in Texas Estuaries at Varying Population Sizes. Marine and Coastal Fisheries, 8(1), 222–231. http://doi.org/10.1080/19425120.2015.1079577
Southern Flounder	Paralichthys lethostigma	Furey, N. B., & Rooker, J. R. (2013). Spatial and temporal shifts in suitable habitat of juvenile southern flounder (Paralichthys lethostigma). Journal of Sea Research, 76, 161–169. http://doi.org/10.1016/j.seares.2012.08.007
Southern Flounder	Paralichthys lethostigma	Furey, N. B., Dance, M. A., & Rooker, J. R. (2013). Fine-scale movements and habitat use of juvenile southern flounder Paralichthys lethostigma in an estuarine seascape. Journal of Fish Biology, 82(5), 1469–1483. http://doi.org/10.1111/jfb.12074
Southern Flounder	Paralichthys lethostigma	Henderson-Arzapalo, A., Colura, R. L., & Maciorowski, A. F. (1988). Temperature and Photoperiod Induced Maturation of Southern Flounder. Management Data Series, 154, 25. Retrieved from https://tpwd.texas.gov/publications/pwdpubs/media/mds_coastal/Series 1_MDS154.pdf
Southern Flounder	Paralichthys lethostigma	Kaiser, J. B., Faulk, C. K., Williamson, E. A., & Holt, J. G. (2012). Natural spawning and larviculture of southern flounder Paralichthys lethostigma. World Aquaculture, March, 48–54. Retrieved from https://www.was.org/Magazine/ArticleContent.aspx?Id=796
Southern Flounder	Paralichthys lethostigma	Lowe, M. R., DeVries, D. R., Wright, R. A., Ludsin, S. A., & Fryer, B. J. (2011). Otolith Microchemistry Reveals Substantial Use of Freshwater by Southern Flounder in the Northern Gulf of Mexico. Estuaries and Coasts, 34(3), 630–639. http://doi.org/10.1007/s12237-010-9335-9
Southern Flounder	Paralichthys lethostigma	Luckenbach, J. A., Godwin, J., Daniels, H. V, & Borski, R. J. (2003). Gonadal differentiation and effects of temperature on sex determination in southern flounder (Paralichthys lethostigma). Aquaculture, 216(1–4), 315–327. http://doi.org/10.1016/S0044-8486(02)00407-6
Southern Flounder	Paralichthys lethostigma	Matlock, G. C. (1992). Growth of five fishes in Texas bays in the 1960s. Fishery Bulletin, 90(2), 407–411. Retrieved from http://fishbull.noaa.gov/902/matlock.pdf
Southern Flounder	Paralichthys lethostigma	Reagan, R. E., & Wingo, W. M. (1985). Species profiles: life histories and environmental requirements of coastal fishes and invertebrates (Gulf of Mexico)-southern flounder. U.S. Fish Wildl. Serv. Biol. Rep., 82(11), 9.
Southern Flounder	Paralichthys lethostigma	Safrit Jr, F JSchwartz, F. (1998). Age and growth, weight, and gonadosomatic indices for female southern flounder, Paralichthys lethostigma, from Onslow Bay, North Carolina. The Journal of the Elisha Mitchell Scientific Society. Retrieved from http://scholar.google.com/scholar?hl=en&btnG=Search&q=intitle:Age+and+growth,+weight,+and+gonadosomatic+indices+for+female+southern+flounder+Paralichthys+l…
Southern Flounder	Paralichthys lethostigma	Shepard, J. A. (1986). Spawning peak of southern flounder, Paralichthys lethostigma, in Louisiana. Technical Bulletin, Louisiana Department of Wildlife and Fisheries, 40, 77–79. Retrieved from http://www.lsu.edu/seagrantfish/biological/misc/southernflounder.htm
Southern Flounder	Paralichthys lethostigma	Smith, T. I. J., McVey, D. C., Jenkins, W. E., Denson, M. R., Heyward, L. D., Sullivan, C. V, & Berlinsky, D. L. (1999). Broodstock management and spawning of southern flounder, Paralichthys lethostigma. Aquaculture, 176(1–2), 87–99. http://doi.org/10.1016/S0044-8486(99)00053-8
Southern Flounder	Paralichthys lethostigma	Smith, W. E., Scharf, F. S., & Hightower, J. E. (2009). Fishing mortality in North Carolina’s southern flounder fishery: Direct estimates of instantaneous fishing mortality from a tag return experiment. Marine and Coastal Fisheries: Dynamics, Management, and Ecosystem Science, 1(1), 283–299. http://doi.org/10.1577/C09
Southern Flounder	Paralichthys lethostigma	Stokes, G. M. (1977). Life history studies of southern flounder (Paralichthys lethostigma) and Gulf flounder (P. albigutta) in the Aransas Bay area of Texas. 1977. Retrieved from https://repositories.tdl.org/tamug-ir/handle/1969.3/24687
Southern Flounder	Paralichthys lethostigma	Stunz, G. W., Linton, T. L., & Colura, R. L. (2000). Age and growth of southern flounder in Texas waters, with emphasis on Matagorda Bay. Transactions of the American Fisheries Society, 129(1), 119–125. http://doi.org/10.1577/1548-8659(2000)129<0119
Southern Flounder	Paralichthys lethostigma	VanderKooy, S. J. (2015). Management Profile for the Gulf and Southern Flounder Fishery in the Gulf of Mexico. Gulf States Marine Fisheries Commision, Ocean Springs, MI. Retrieved from http://www.gsmfc.org/publications/GSMFC Number 247.pdf
Southern Flounder	Paralichthys lethostigma	Watanabe, W. O., Carroll, P. M., & Daniels, H. V. (2001). Sustained, natural spawning of southern flounder Paralichthys lethostigma under an extended photothermal regime. Journal of the World Aquaculture Society, 32(2), 153–166. http://doi.org/10.1111/j.1749-7345.2001.tb00366.x
Southern Flounder	Paralichthys lethostigma	Watanabe, W. O., Woolridge, C. A., & Daniels, H. V. (2006). Progress Toward Year round Spawning of Southern Flounder Broodstock by Manipulation of Photoperiod and Temperature. Journal of the World of Aquaculture Society, 37(3), 256–272. Retrieved from http://onlinelibrary.wiley.com/doi/10.1111/j.1749-7345.2006.00036.x/pdf
Southern Flounder	Paralichthys lethostigma	Williams, L. (n.d.). Flounder Fishing in Texas. Dickins. Retrieved from http://tpwd.texas.gov/huntwild/wild/species/flounder/
Spanish Mackerel	Scomberomorus maculatus	Berrien, P., & Finan, D. (1977). Biological and fisheries data on spanish mackerel, Scomberomorus maculatus (Mitchill). Highlands, NJ. Retrieved from http://repositories.tdl.org/tamug-ir/handle/1969.3/20231
Spanish Mackerel	Scomberomorus maculatus	Collette, B. B., Russo, J. L., & Zavala-Camin, L. A. (1978). Scomberomorus brasiliensis, a new species of Spanish mackerel from the western Atlantic. Fishery Bulletin, 76(1), 273–280. Retrieved from http://fishbull.noaa.gov/76-1/collette.pdf
Spanish Mackerel	Scomberomorus maculatus	Collins, M. R., & Stender, B. W. (1987). Larval king mackerel ( Scomberomorus cavalla), Spanish mackerel (S. maculatus), and bluefish ( Pomatomus saltatrix) off the southeast coast of the United States, 1973-1980. Bulletin of Marine Science, 41(3), 822–834. http://doi.org/10.1017/CBO9781107415324.004
Spanish Mackerel	Scomberomorus maculatus	Cooksey, C. L. (1996). Reproductive biology of Spanish mackerel, Scomberomorus maculatus, in the lower Chesapeake Bay. M.S. Thesis. The College of William and Mary in Virginia. Retrieved from https://digitalarchive.wm.edu/handle/10288/13437
Spanish Mackerel	Scomberomorus maculatus	De Vries, D. A., Grimes, C. B., Lang, K. L., & White, B. D. W. (1990). Age and growth of king and Spanish mackerel larvae and juveniles from the Gulf of Mexico and U.S. South Atlantic Bight. Environmental Biology of Fishes, 29(2), 135–143. http://doi.org/10.1007/BF00005030
Spanish Mackerel	Scomberomorus maculatus	DeVries, D. A., Grimes, C. B., & Prager, M. H. (2002). Using otolith shape analysis to distinguish eastern Gulf of Mexico and Atlantic Ocean stocks of king mackerel. Fisheries Research, 57(1), 51–62. http://doi.org/10.1016/S0165-7836(01)00332-0
Spanish Mackerel	Scomberomorus maculatus	Fable, W. A., Johnson, A. G., & Barger, L. E. (1987). Age and growth of spanish mackerel, Scomberomorus maculatus, from Florida and the Gulf of Mexico. Fishery Bulletin, 85(4), 777–783.
Spanish Mackerel	Scomberomorus maculatus	Finucane, J. H., & Collins, L. A. (1986). Reproduction of Spanish mackerel, Scomberomorus maculatus, from the southeastern United States. Northeast Gulf Science, 8(2), 97–106.
Spanish Mackerel	Scomberomorus maculatus	Godcharles, M. F., & Murphy, M. D. (1986). Species Profiles. Life Histories and Environmental Requirements of Coastal Fishes and Invertebrates (South Florida). King Mackerel and Spanish Mackerel. U.S. Fish Wildl. Serv. Biol. Rep., 82, 18. Retrieved from http://oai.dtic.mil/oai/oai?verb=getRecord&amp;metadataPrefix=html&amp;identifier=ADA173749
Spanish Mackerel	Scomberomorus maculatus	Hoese, H. D. (1965). Spawning of marine fishes in the Port Aransas, Texas area a determined by the distribution of young and larvae. University of Texas at Austin. Retrieved from http://www.worldcat.org/title/spawning-of-marine-fishes-in-the-port-aransas-texas-area-as-determined-by-the-distribution-of-young-and-larvae/oclc/44799910
Spanish Mackerel	Scomberomorus maculatus	McEachron, J. D. (1980). Distribution, seasonality and abundance of King and Spanish mackerel larvae in the northwestern Gulf of Mexico (Pisces: Scombridae). Texas A & M University. Retrieved from https://repositories.tdl.org/tamug-ir/handle/1969.3/19501
Spanish Mackerel	Scomberomorus maculatus	Medina Quej, A., & Dominguez Viveros, M. (1997). Age and growth of Scomberomorus maculatus (Scombriformes: Scombridae) in Quintana Roo, Mexico. Revista de Biologia Tropical, 45(3), 1155–1161.
Spanish Mackerel	Scomberomorus maculatus	Powell, D. (1975). Age, growth, and reproduction in Florida stocks of Spanish mackerel, Scomberomorus maculatus. Florida Marine Research Publications (Vol. 5). Retrieved from http://aquaticcommons.org/765/1/FMRP005.pdf
Spanish Mackerel	Scomberomorus maculatus	Schmidt, D. J., Collins, M. R., & Wyanski, D. M. (1993). Age, growth, maturity, and spawning of Spanish mackerel, Scomberomorus maculatus (Mitchill), from the Atlantic Coast of the southeastern United States*. Fishery Bulletin, 91, 526–533.
Spanish Mackerel	Scomberomorus maculatus	SEDAR. (2008). SEDAR 17 Stock Assessment Report South Atlantic Spanish Mackerel. SEDAR. North Charleston, SC. Retrieved from http://sedarweb.org/docs/sar/S17SAR1 Spanish Mackerel Final.pdf
Spanish Mackerel	Scomberomorus maculatus	SEDAR. (2013). SEDAR 28 Gulf of Mexico Spanish Mackerel Stock Assessment Report. SEDAR. North Charleston, SC. Retrieved from http://www.sefsc.noaa.gov/sedar/Sedar_Workshops.jsp?WorkshopNum=28
Spanish Mackerel	Scomberomorus maculatus	Valeiras, J., & Abad, E. (2006). Description of Atlantic Spanish Mackerel. Retrieved January 1, 2016, from https://www.iccat.int/Documents/SCRS/Manual/CH2/2_1_11_6_SSM_ENG.pdf
Speckled Hind	Epinephelus drummondhayi	Andrews, A. H., Barnett, B. K., Allman, R. J., Moyer, R. P., & Trowbridge, H. D. (2013). Great longevity of speckled hind (Epinephelus drummondhayi), a deep-water grouper, with novel use of postbomb radiocarbon dating in the Gulf of Mexico. Canadian Journal of Fisheries and Aquatic Sciences, 70, 1131–1140. Retrieved from http://www.nrcresearchpress.com/doi/pdf/10.1139/cjfas-2012-0537
Speckled Hind	Epinephelus drummondhayi	Brulé, T., Colás-Marrufo, T., Tuz-Sulub, A., & Déniel, C. (2000). Evidence for protogynous hermaphroditism in the serranid fish Epinephelus drummondhayi (Perciformes: Serranidae) from the Campeche Bank in the Southern Gulf of Mexico. Bulletin of Marine Science, 66(2), 513–521. Retrieved from http://www.ingentaconnect.com/content/umrsmas/bullmar/2000/00000066/00000002/art00022
Speckled Hind	Epinephelus drummondhayi	Bullock, L. H., & Smith, G. B. (1991). Memoirs of the Hourglass Cruises: Sea Basses (Pisces: Serranidae). St. Petersburg, FL: Florida Marine Research Istititute. Retrieved from http://aquaticcommons.org/750/1/8.2.pdf
Speckled Hind	Epinephelus drummondhayi	Chester, A. J., Huntsman, G. R., Tester, P. A., & Manooch III, C. S. (1984). South Atlantic Bight Reef Fish Communities As Represented in Hook-and-Line Catches. Bulletin of Marine Science, 34(2), 267–279. Retrieved from http://www.ingentaconnect.com/contentone/umrsmas/bullmar/1984/00000034/00000002/art00009?crawler=true
Speckled Hind	Epinephelus drummondhayi	Farmer, N. A., & Karnauskas, M. (2013). Spatial distribution and conservation of speckled hind and warsaw grouper in the Atlantic Ocean off the southeastern U.S. PLoS ONE, 8(11). http://doi.org/10.1371/journal.pone.0078682
Speckled Hind	Epinephelus drummondhayi	Farmer, N. A., Malinowski, R. P., McGovern, M. F., & Rubec, P. J. (2016). Stock complexes for fisheries management in the Gulf of Mexico. Marine and Coastal Fisheries, 8(1), 177–201. http://doi.org/10.1080/19425120.2015.1024359
Speckled Hind	Epinephelus drummondhayi	Gilmore, R. G., & Jones, R. S. (1992). Color Variation and Associated Behavior in the Epinepheline Groupers, Mycteroperca microlepis (Goode and Bean) and M. phenax (Jordan and Swain). Bulletin of Marine Science, 51(1), 83–103. Retrieved from http://www.ingentaconnect.com/content/umrsmas/bullmar/1992/00000051/00000001/art00009
Speckled Hind	Epinephelus drummondhayi	Heemstra, P. C., & Randall, J. E. (1993). FAO species catalogue vol. 16 groupers of the world (family serranidae, subfamily epinephelinae): An annotated and illustrated catalogue of the grouper, …. Food and Agriculture Organization of the United Nations. Retrieved from http://afrilib.odinafrica.org/handle/0/15799
Speckled Hind	Epinephelus drummondhayi	Matheson, R. H., & Huntsman, G. R. (1984). Growth, Mortality, and Yield-per-Recruit Models for Speckled Hind and Snowy Grouper from the United States South Atlantic Bight. Transactions of the American Fisheries Society, 113(5), 607–616. Retrieved from http://www.tandfonline.com/doi/abs/10.1577/1548-8659(1984)113%3C607%3AGMAYMF%3E2.0.CO%3B2#.Vz4PR5ErLcs
Speckled Hind	Epinephelus drummondhayi	NOAA. (2012). Distribution of speckled hind and warsaw grouper in the U.S. South Atlantic. SERO-LAPP. St. Petersburg, FL. Retrieved from http://sero.nmfs.noaa.gov/sustainable_fisheries/lapp_dm/archives/documents/pdfs/2012/sero_lapp_2012_08_reg17_speckled_hind__and_warsaw_grouper_in_safmc.pdf
Speckled Hind	Epinephelus drummondhayi	Rudershausen, P. J., Williams, E. H., Buckel, J. A., Potts, J. C., & Manooch, C. S. (2008). Comparison of reef fish catch per unit effort and total mortality between the 1970s and 2005-2006 in Onslow Bay, North Carolina. Transactions of the American Fisheries Society, 137(5), 1389–1405. http://doi.org/10.1577/T07-159.1
Speckled Hind	Epinephelus drummondhayi	Sedar. (2016). Sedar 49 Gulf of Mexico Data-limited Species : red drum, lane snapper, wenchman, yellowmouth grouper, speckled hind, snowy grouper, almaco jack, lesser amberjack. North Charleston, SC.
Speckled Hind	Epinephelus drummondhayi	Sedberry, G. R., Pashuk, O., Pashuk, O., Wyanski, D. M., Wyanski, D. M., Wyanski, D. M., … Stephen, J. A. (2006). Spawning locations for Atlantic reef fishes off the Southeastern U.S. Proc. of the 57th Gulf and Caribbean Fisheries Institute, 463–514. Retrieved from http://graysreef.noaa.gov/science/publications/pdfs/i-49.pdf
Speckled Hind	Epinephelus drummondhayi	Ziskin, G. L. (2008). Age, Growth and Reproduction of Speckled Hind, Epinephelus drummondhayi, Off the Atlantic Coast of the Southeast United States. M.S. Thesis. College of Charleston. Retrieved from http://safmc.net/managed-areas/pdf/Ziskin2008_SHthesis.pdf
Speckled Hind	Epinephelus drummondhayi	Ziskin, G. L., Harris, P. J., Wyanski, D. M., & Reichert, M. J. M. (2011). Indications of Continued Overexploitation of Speckled Hind Along the Atlantic Coast of the Southeastern United States. Transactions of the American Fisheries Society, 140(2), 384–398. http://doi.org/10.1080/00028487.2011.567863
Spotted Seatrout	Cynoscion nebulosus	Alshuth, S., & Gilmore, R. G. (1994). Salinity and temperature tolerance limits for larval spotted seatrout, Cynoscion nebulosus (Pisces: Sciaenidae). Fort Pierce, FL: International Council for the Exploration of the Sea.
Spotted Seatrout	Cynoscion nebulosus	Anderson, J. D., & Karel, W. J. (2009). A Genetic Assessment of Current Management Strategies for Spotted Seatrout in Texas. Marine and Coastal Fisheries, 1(1), 121–132. http://doi.org/10.1577/c09-001.1
Spotted Seatrout	Cynoscion nebulosus	Arnoldi, D. C. (1984). Aspects of the biology of spotted seatrout in Calcasieu Lake, Louisiana, with management implications. In Proceedings Annual Conference Southeast Association of Fish and Wildlife Agencies (pp. 470–479).
Spotted Seatrout	Cynoscion nebulosus	Baker, W. B., & Matlock, G. C. (1993). Movement of spotted seatrout tagged in Trinity Bay, Texas.
Spotted Seatrout	Cynoscion nebulosus	Baker, W.B., J., Matlock, G. C., McEachron, L. W., Green, A. W., & Hegen, H. E. (1986). Movement, growth, and survival of spotted seatrout tagged in Bastrop Bayou, Texas.
Spotted Seatrout	Cynoscion nebulosus	Baltz, D. M., Thomas, R. G., & Chesney, E. J. (2003). Spotted Seatrout Habitat Affinities in Louisiana. In S. A. Bortone (Ed.), Biology of the Spotted Seatrout (1st ed., pp. 147–175). Boca Raton, FL: CRC Press.
Spotted Seatrout	Cynoscion nebulosus	Bedee, C. D., Devries, D. A., Bortone, S. A., & Palmer, C. L. (2003). Estuary-Specific Age and Growth of Spotted Seatrout in the Northern Gulf of Mexico. In S. A. Bortone (Ed.), Biology of the Spotted Seatrout (1st ed., pp. 57–77). Boca Raton, FL: CRC Press.
Spotted Seatrout	Cynoscion nebulosus	Blanchet, H., Van Hoose, M., McEachron, L., Muller, B., Warren, J., Gill, J., … VanderKooy, S. (ed. . (2001). The spotted seatrout fishery of the Gulf of Mexico, United States: A regional management plan, 87. Retrieved from http://www.gsmfc.org/publications/GSMFC Number 087.pdf
Spotted Seatrout	Cynoscion nebulosus	Bortone, S. A. (2003). Biology of the Spotted Seatrout. (S. A. Bortone, Ed.). Boca Raton, FL: CRC Press. Retrieved from https://www.crcpress.com/Biology-of-the-Spotted-Seatrout/Bortone/p/book/9780849311291
Spotted Seatrout	Cynoscion nebulosus	Brown-Peterson, N. J. (2003). The reproductive biology of Spotted Seatrout. In S. A. Bortone (Ed.), Biology of the Spotted Seatrout (1st ed., pp. 99–133). Boca Raton, FL: CRC Press.
Spotted Seatrout	Cynoscion nebulosus	Brown-Peterson, N. J., & Warren, J. W. (2001). The reproductive biology of spotted seatrout, Cynoscion nebulosus, along the Mississippi Gulf Coast. Gulf of Mexico Science. Retrieved from http://gcrl.usm.edu/cv/brown-peterson.nancy/docs/GOMS paper.pdf
Spotted Seatrout	Cynoscion nebulosus	Brown-peterson, N. J., Peterson, M. S., Nieland, D. L., Murphy, M. D., Taylor, R. G., & Warren, J. R. (2002). Reproductive biology of female spotted seatrout, Cynoscion nebulosus, in the Gulf of Mexico: differences among estuaries? Environmental Biology of Fishes, 405–415. Retrieved from https://gcrl.usm.edu/cv/peterson.mark/docs/Brown-Peterson et al 2002.PDF
Spotted Seatrout	Cynoscion nebulosus	Brown-peterson, N., Thomas, P., & Arnold, C. R. (1988). Reproductive biology of the Spotted Seatrout,Cynoscion nebulosus, in South Texas. Fishery Bulletin, 86(2), 373–388. Retrieved from http://fishbull.noaa.gov/862/brown.pdf
Spotted Seatrout	Cynoscion nebulosus	Bumbuardner, B. W., Colura, R. L., Young, E., Westbrook, D., & Viskers, R. (1998). Reproductive maturity of age one spotted seatrout in Texas coastal waters. Austin, TX.
Spotted Seatrout	Cynoscion nebulosus	Chen, Q. (2014). Reproductive behavior and mating system of spotted seatrout. Texas Tech University.
Spotted Seatrout	Cynoscion nebulosus	Collins, M. R., Callahan, B. M., & Post, W. C. (2001). Spawning aggregations of recreationally important Sciaenid species in the Savannah Harbor: spotted seatrout Cynoscion nebulosus, red drum Sciaenops ocellatus, weakfish Cynoscion regalis, and black drum Pogonias cromis. South Carolina Department of Natural Resources, Charleston, South Carolina. Retrieved from https://www.researchgate.net/publi…
Spotted Seatrout	Cynoscion nebulosus	Colura, R. L., & Maciorowski, A. F. (1988). An evaluation of the collection of preovulatory females and hormone induced tank-spawning of spotted trout. Austin, TX: Texas Parks and Wildlife Department, Coastal Fisheries. Retrieved from http://168.44.251.32/publications/pwdpubs/media/mds_coastal/Series 1_MDS144.pdf
Spotted Seatrout	Cynoscion nebulosus	Colura, R. L., Bumguardner, B. W., & Gray, J. D. (1996). Observations on length and gonadal maturation of young-of-the-year spotted seatrout. Austin, TX: Texas Parks and Wildlife Department, Coastal Fisheries.
Spotted Seatrout	Cynoscion nebulosus	Colura, R. L., Mach, A., & Buckley, R. (1994). Comparison of Texas spotted seatrout growth among year classes and bay systems. Austin, TX: Federal Aid in Fisheries Restoration Act Project F-36-R.
Spotted Seatrout	Cynoscion nebulosus	Colura, R. L., Porter, C. W., & Maciorowski, A. F. (1984). Preliminary evaluation of the scale method for describing age and growth of spotted seatrout ( Cynoscion Nebulosus) in the Matagorda bay system , Texas. Austin, TX: Texas Parks and Wildlife Department, Coastal Fisheries. Retrieved from https://tpwd.texas.gov/publications/pwdpubs/media/mds_coastal/Series 1_MDS57.pdf
Spotted Seatrout	Cynoscion nebulosus	Coto, C. F., & Argudin, M. P. (1991). Efecto de la marea in el paso de larvs de sciaenidos (Pisces) en Boca del Carmen, Laguna de Terminos, Campeche. Ann. Instit. Ciencias Mar Limn, 18, 25–35.
Spotted Seatrout	Cynoscion nebulosus	DeVries, D. A., & Chittenden, M. E. (1982). Spawning, age determination, longevity, and mortality of the silver seatrout, Cynoscion nothus, in the Gulf of Mexico. Fishery Bulletin, 89(3), 487–500. Retrieved from http://texasseagrant.org/assets/uploads/publications/1983/83-812.pdf
Spotted Seatrout	Cynoscion nebulosus	Devries, D. A., Bedee, C. D., & Palmer, C. L. (2003). The Demographics and Reproductive Biology of Spotted Seatrout, Cynoscion nebulosus, in Six Northwest Florida Estuaries. In S. A. Bortone (Ed.), Biology of the Spotted Seatrout (1st ed., pp. 79–98). Boca Raton, FL: CRC Press.
Spotted Seatrout	Cynoscion nebulosus	DeVries, D. A., Dedde, D. C., Palmer, C. L., & Bortone, S. A. (1997). Age, growth, maturity, and size composition of spotted seatrout, Cynoscion nebulosus, in the Panhandle region of Florida. Tallahassee, FL: Florida Department of Environmental Protection.
Spotted Seatrout	Cynoscion nebulosus	Gilmore, R. G. (2003). Sound production and communication in the spotted seatrout. In S. A. Bortone (Ed.), Biology of the spotted seatrout (1st ed., pp. 177–195). Boca Raton, FL: CRC Press.
Spotted Seatrout	Cynoscion nebulosus	Gold, J. R., Stewart, L. B., & Ward, R. (2003). Population structure of spotted seatrout (Cynoscion nebulosus) along the Texas Gulf Coast, as revealed by genetic analysis. In S. A. Bortone (Ed.), Biology of the Spotted Seatrout (pp. 17–29). Boca Raton: CRC Press.
Spotted Seatrout	Cynoscion nebulosus	Gray, J. D., King, T. L., & Colura, R. L. (1991). Effect of Temperature and Hypersalinity on Hatching Success of Spotted Seatrout Eggs. The Progressive Fish-Culturist, 53(2), 81–84. http://doi.org/10.1577/1548-8640(1991)053<0081:EOTAHO>2.3.CO;2
Spotted Seatrout	Cynoscion nebulosus	Guest, W. C., & Gunter, G. (1958). The sea trout or weakfishes (Genus Cynoscion) of the Gulf of Mexico. Gulf States Marine Fisheries Commission Technical Summary, 1, 40.
Spotted Seatrout	Cynoscion nebulosus	Hein, S., & Shepard, J. (1979). Spawning of spotted seatrout in a Louisiana estuarine ecosystem. Proceedings of the Annual Conference - Southeastern Association of Fish and Wildlife Agencies, (33), 451–465. Retrieved from http://seafwa.org//resource/dynamic/private/PDF/HEIN-451-465.pdf
Spotted Seatrout	Cynoscion nebulosus	Helser, T. E., Condrey, R. E., & Geaghan, J. P. (1993). Spotted Seatrout Distribution in Four Coastal Louisiana Estuaries. Transactions of the American Fisheries Society, 122(1), 99–111. http://doi.org/10.1577/1548-8659(1993)122<0099:SSDIFC>2.3.CO;2
Spotted Seatrout	Cynoscion nebulosus	Holt, G. J., & Holt, S. A. (2003). Effects of Variable Salinity on Reproduction and Early Life Stages of Spotted Seatrout. In S. A. Bortone (Ed.), Biology of the Spotted Seatrout (1st ed., pp. 135–145). Boca Raton, FL: CRC Press.
Spotted Seatrout	Cynoscion nebulosus	Holt, G. J., Holt, S. A., & Arnold, C. R. (1985). Diel periodicity of spawning in sciaenids. Marine Ecology Progress Series, 27, 1–7. http://doi.org/10.3354/meps027001
Spotted Seatrout	Cynoscion nebulosus	Johnson, D. R., & Seaman, W. (1986). Species Profiles : Life Histories and Environmental Requirements of Coastal Fishes and Invertebrates (south Florida) - spotted seatrout. U.S. Fish Wildl. Serv. Biol. Rep., 82(11.43), 18. Retrieved from https://catalog.hathitrust.org/Record/008337093
Spotted Seatrout	Cynoscion nebulosus	Klima, E., & Tabb, D. C. (1959). A contribution to the biology of the spotted weakfish, Cynoscion nebulosus (Cuvier), from northwest Florida, with a description of the fishery. Florida Board of Conservation Marine Research, 30.
Spotted Seatrout	Cynoscion nebulosus	Kucera, C. J., Faulk, C. K., & Holt, G. J. (2002). The effect of spawning salinity on eggs of spotted seatrout (Cynoscion nebulosus, Cuvier) from two bays with historically different salinity regimes. Journal of Experimental Marine Biology and Ecology, 272(2), 147–158. http://doi.org/10.1016/S0022-0981(02)00081-3
Spotted Seatrout	Cynoscion nebulosus	Kupschus, S. (2004). A temperature-dependent reproductive model for spotted seatrout (Cynoscion nebulosus) explaining spatio-temporal variations in reproduction and young-of-the-year recruitment in Florida estuaries, 61, 3–11. http://doi.org/10.1016/j.icesjms.2003.10.009
Spotted Seatrout	Cynoscion nebulosus	Lorio, W. J., & Perret, W. S. (1978). Biology and Ecology of the Spotted Seatrout (Cynoscion nebulosus) Cuvier. Proceedings of the Red Drum and Seatrout Colloquium, (5), 7–13. Retrieved from http://www.gsmfc.org/publications/GSMFC Number 005.pdf#page=15
Spotted Seatrout	Cynoscion nebulosus	Lowerre-Barbieri, S. K. (2009). Reproduction in Relation to Conservation and Exploitation of Marine Fishes. Reproductive Biology and Phylogeny of Fishes, 371–394. http://doi.org/doi:10.1201/b10257-11
Spotted Seatrout	Cynoscion nebulosus	Lowerre-barbieri, S. K., Henderson, N., Llopiz, J., Walters, S., Bickford, J., & Muller, R. (2009). Defining a spawning population of spotted seatrout (Cynoscion nebulosus) over temporal , spatial , and demographic scales. Marine Ecology Progress Series, 394, 231–245. http://doi.org/10.3354/meps08262
Spotted Seatrout	Cynoscion nebulosus	Lowerre-Barbieri, S. K., Walters, S., Bickford, J., Cooper, W., & Muller, R. (2013). Site fidelity and reproductive timing at a spotted seatrout spawning aggregation site: individual versus population scale behavior. Marine Ecology Progress Series, 481, 181. http://doi.org/10.3354/meps10224
Spotted Seatrout	Cynoscion nebulosus	Luczkovich, J. J., Daniel III, H. J., & Sprague, M. W. (1999). Characterization of critical spawning habitats of weakfish , spotted seatrout and red drum in Pamlico Sound using hydrophone surveys. Final Report and Annual Performance Report. North Carolina Department of Natural Resources. Moorehead City, NC.
Spotted Seatrout	Cynoscion nebulosus	Maceina, M. J., Hata, D. N., Linton, T. L., & Landry Jr, A. M. (1987). Age and growth analysis of spotted seatrout from Galveston Bay, Texas. Transactions of the American Fisheries Society, 116, 54–59. Retrieved from http://www.tandfonline.com/doi/abs/10.1577/1548-8659%281987%29116%3C54%3AAAGAOS%3E2.0.CO%3B2?journalCode=utaf20
Spotted Seatrout	Cynoscion nebulosus	McMichael, R. H., & Peters, K. M. (1989). Early life history of spotted seatrout, Cynoscion nebulosus (Pisces: Sciaenidae), in Tampa Bay, Florida. Estuaries, 12(2), 98–110. http://doi.org/10.2307/1351501
Spotted Seatrout	Cynoscion nebulosus	Moffett, A. W. (1961). Movements and growth of spotted seatrout, Cynoscion nebulosus (Cuvier) in West Florida. Technical series, Florida State Board of Conservation.
Spotted Seatrout	Cynoscion nebulosus	Mok, H., & Gilmore, R. G. (1983). Analysis of sound production in estuarine aggregations of Pofoniasw cromis, Bairdiella chrysoura, and Cynoscion nebulosus (Sciaenidae). Bulletin Institute Zoology, Academia Sinica, 22(2), 157–186.
Spotted Seatrout	Cynoscion nebulosus	Moody, W. (1950). A study of the natural history of the spotted trout, Cynoscion nebulosus in the Cedar Key, Florida, area. Q. J. Florida Academy of Science, 12(3), 147–171.
Spotted Seatrout	Cynoscion nebulosus	Murphy, M. D., & Taylor, R. G. (1994). Age, Growth, and Mortality of Spotted Seatrout in Florida Waters. Transactions of the American Fisheries Society, 123(4), 482–497. http://doi.org/10.1577/1548-8659(1994)123<0482:AGAMOS>2.3.CO;2
Spotted Seatrout	Cynoscion nebulosus	Nieland, D. L., Thomas, R. G., & Wilson, C. A. (2002). Age, growth and reproduction of Spotted Seatrout in Barataria Bay, Louisiana. Transactions of the American Fisheries Society, 131(2), 245–259. http://doi.org/10.1577/1548-8659(2002)131<0245
Spotted Seatrout	Cynoscion nebulosus	Overstreet, R. (1983). Aspects of the Biology of the Spotted Seatrout, Cynoscion nebulosus, in Mississippi. Gulf Research Reports, 1(Supplement), 1–43. http://doi.org/10.18785/grr.07supp.02
Spotted Seatrout	Cynoscion nebulosus	Pearson, J. C. (1928). Natural History and Conservation of Redfish and Other Commercial Sciaenids on the Texas Coast. Bulletin of the United States Bureau of Fisheries, XLIV, 129–214. Retrieved from https://repositories.tdl.org/tamug-ir/bitstream/handle/1969.3/23948/553-Natural History and Conservation of Redfish and Other Commercial Sciaenids on the Texas Coast.pdf?sequence=1&isAllowed=y
Spotted Seatrout	Cynoscion nebulosus	Perret, W. S., Weaver, J. E., Williams, R. O., Johansen, P. L., McIlwain, T. D., & Raulerson, R. C. (1980). Fishery profile of red drum and spotted seatrout. Gulf States Marine Fisheries Commission. Ocean Springs, MS. Retrieved from http://repositories.tdl.org/tamug-ir/handle/1969.3/22328
Spotted Seatrout	Cynoscion nebulosus	Roumillat, W. A., & Brouwer, M. C. (2004). Reproductive dynamics of female spotted seatrout (Cynoscion nebulosus) in South Carolina. Fisheries Bulletin, 102, 473–487.
Spotted Seatrout	Cynoscion nebulosus	Roumillat, W. A., Riekerk, G. H. M., & Tyree, S. J. (1995). Acoustic sampling to identify red drum., spotted seatrout, and black drum spawning locations in South Carolina and Georgia. Final Essential Fish Habitat Plan. South Atlantic Fishery Management Council. North Charleston, SC. Retrieved from http://www.safmc.net/habitat-ecosystem/pdf/Hab_planAppS.pdf
Spotted Seatrout	Cynoscion nebulosus	Rutherford, E. S. (1982). Age, growth , and mortality of spotted seatrout, Cynoscion nebulosus, in Everglades National Park, Florida. University of Miami, Coral Gables.
Spotted Seatrout	Cynoscion nebulosus	Rutherford, E. S., Schmidt, T. W., & Tilmant, J. T. (1989). Early life history of spotted seatrout (Cynoscion nebulosus) and gray snapper (Lutjanus griseus) in Florida Bay, Everglades National Park, Florida. Bulletin of Marine Sicence, 44(1), 49–64. Retrieved from http://docserver.ingentaconnect.com/deliver/connect/umrsmas/00074977/v44n1/s4.pdf?expires=1404405370&id=78580308&titleid=10983&accname…
Spotted Seatrout	Cynoscion nebulosus	Saucier, M. H., & Baltz, D. M. (1993). Spawning site selection by spotted seatrout, Cynoscion nebulosus, and black drum, Pogonias cromis, in Louisiana. Environmental Biology of Fishes, 36, 257–272. Retrieved from http://link.springer.com/article/10.1007/BF00001722
Spotted Seatrout	Cynoscion nebulosus	Sundararaj, B. I., & Suttkus, R. D. (1962). Fecundity of the Spotted Seatrout, Cynoscion nebulosus (Cuvier), from Lake Borgne Area, Louisiana. Transactions of the American Fisheries Society, 91(1), 84–88. http://doi.org/10.1577/1548-8659(1962)91[84:FOTSSC]2.0.CO;2
Spotted Seatrout	Cynoscion nebulosus	Tabb, D. C. (1966). The estuary as a habitat for spotted seatrout, Cynoscion nebulosus. Allen Press, Incorporated. Retrieved from https://repositories.tdl.org/tamug-ir/handle/1969.3/19765
Spotted Seatrout	Cynoscion nebulosus	Walters, S. L. (2005). Mapping Tampa Bay Cynoscion nebulosus spawning habitat using passive acoustic surveys by. M.S. Thesis.University of Southern Florida. Retrieved from http://scholarcommons.usf.edu/etd/901/
Spotted Seatrout	Cynoscion nebulosus	Walters, S., Lowerre, S., Bickford, J., & Mann, D. (2009). Using a passive acoustic survey to identify spotted seatrout spawning sites and associated habitat in Tampa Bay, Florida. Transactions of the …, 138(1), 88–98. Retrieved from http://www.tandfonline.com/doi/abs/10.1577/T07-106.1
Spotted Seatrout	Cynoscion nebulosus	Walters, S., Lowerre-barbieri, S., Bickford, J., Crabtree, L., & Mann, D. A. (2007). Preliminary Results on Seasonal and Diel Periodicities of a Resident Cynoscion nebulosus Spawning Aggregation in Tampa Bay , Florida. Gulf & Caribbean Fisheries Institute, (February 2016), 282–285.
Spotted Seatrout	Cynoscion nebulosus	Ward, G. H. (1997). Processes and trends of circulation within the Corpus Christi Bay National Estuary Program study area. Corpus Christi.
Spotted Seatrout	Cynoscion nebulosus	Warren, J. (1995). Spotted seatrout sportsfish studies in Mississippi. Ocean Springs, MS: Gulf Coast Research Laboratory.
Spotted Seatrout	Cynoscion nebulosus	Wieting, D. S. (1989). Age, growth, and fecundity of spotted seatrout (Cynoscion nebulosus) in Louisiana. Baton Rouge, LA: Louisiana State University.
Tilefish	Lopholatilus chamaeleonticeps	Able, K. W., Grimes, C. B., & Jones, R. S. (1993). Temporal and spatial variation in habitat characteristics of tilefish (Lopholatilus chamaeleonticeps) off the east coast of Florida. Bulletin of Marine Science, 53(3), 1013–1026. Retrieved from http://www.ingentaconnect.com/content/umrsmas/bullmar/1993/00000053/00000003/art00005
Tilefish	Lopholatilus chamaeleonticeps	Coleman, F. C., & Koenig, C. C. (2010). The effects of fishing, climate change, and other anthropogenic disturbances on red grouper and other reef fishes in the Gulf of Mexico. Integrative and Comparative Biology, 50(2), 201–212. http://doi.org/10.1093/icb/icq072
Tilefish	Lopholatilus chamaeleonticeps	Cook, M., & Lombardi, L. (2007). Yellowedge grouper (Epinephelus flavolimbatus) and golden tilefish (Lopholatilus chamaeleonticeps) distributions, habitat preferences and available biological samples. NOAA Fisheries, Southeast Fisheries Science Center, Panama City, FL. Retrieved from http://sedarweb.org/docs/wsupp/S22_RD03_distribution_habitat.pdf
Tilefish	Lopholatilus chamaeleonticeps	Dooley, J. K. (1978). Systematics and biology of the tilefishes (Perciformes:Branchiostegidae and Malacanthidae) with descriptions of two new species. NOAA Technical Report (Vol. 411). http://spo.nmfs.noaa.gov/Circulars/CIRC411.pdf.
Tilefish	Lopholatilus chamaeleonticeps	Erickson, D. L., & Grossman, G. D. (1986). Reproductive Demography of Tilefish from the South Atlantic Bight with a Test for the Presence of Protogynous Hermaphroditism. Transactions of the American Fisheries Society, 115(2), 279–285. http://doi.org/10.1577/1548-8659(1986)115<279:RDOTFT>2.0.CO;2
Tilefish	Lopholatilus chamaeleonticeps	Erickson, D. L., Harris, M. J., & Grossman, G. D. (1985). Ovarian cycling of tilefish, Lopholatilus chamaeleonticeps (Goode and Bean), from the South Atlantic Bight, U.S.A. Journal of Fish Biology, 27(2), 131–146. http://doi.org/10.1111/j.1095-8649.1985.tb04015.x
Tilefish	Lopholatilus chamaeleonticeps	Farmer, N. A., Malinowski, R. P., McGovern, M. F., & Rubec, P. J. (2016). Stock complexes for fisheries management in the Gulf of Mexico. Marine and Coastal Fisheries, 8(1), 177–201. http://doi.org/10.1080/19425120.2015.1024359
Tilefish	Lopholatilus chamaeleonticeps	Grimes, C. B., Able, K. W., & Jones, R. S. (1986). Tilefish, Lopholatilus chamaeleonticeps, habitat, behaviour and community structure in Mid-Atlantic and southern New England waters. Environmental Biology of Fishes, 15(4), 279–292. Retrieved from https://fau.digital.flvc.org/islandora/object/fau%3A6221/datastream/OBJ/view
Tilefish	Lopholatilus chamaeleonticeps	Grimes, C. B., Able, K. W., & Turner, S. C. (1982). Direct Observation from a Submersible Vessel of Commercial Longlines for Tilefish. Transactions of the American Fisheries Society, 111, 94–98. http://doi.org/10.1577/1548-8659(1982)111[94:DOFASV]2.0.CO;2
Tilefish	Lopholatilus chamaeleonticeps	Grimes, C. B., Idelberger, C. F., Able, K. W., & Turner, S. C. (1988). The Reproductive Biology of Tilefish, Lopholatilus Chamaeleonticeps Goode and Bean, From the United States Mid-Atlantic Bight, and the Effects of Fishing on the Breeding System. Fishery Bulletin, 86(4), 745–762. Retrieved from http://www.sefsc.noaa.gov/labs/panama/library/CG88FB2.pdf
Tilefish	Lopholatilus chamaeleonticeps	Harris, M. J., & Grossman, G. D. (1985). Growth, mortality, and age composition of a lightly exploited tilefish substock off Georgia. Transactions of the American Fisheries Society, 114, 837–846. http://doi.org/10.1577/1548-8659(1985)114<837:GMAACO>2.0.CO;2
Tilefish	Lopholatilus chamaeleonticeps	Harris, P. J., Wyanski, D. M., & Powers Mikell, P. T. (2004). Age, Growth, and Reproductive Biology of Blueline Tilefish along the Southeastern Coast of the United States, 1982–1999. Transactions of the American Fisheries Society, 133(5), 1190–1204. http://doi.org/10.1577/T02-158.1
Tilefish	Lopholatilus chamaeleonticeps	Jones, R. S., Gutherz, E. J., Nelson, W. R., & Matlock, G. C. (1989). Burrow utilization by yellowedge grouper, Epinephelus flavolimbatus, in the northwestern Gulf of Mexico. Environmental Biology of Fishes, 26(4), 277–284. http://doi.org/10.1007/BF00002464
Tilefish	Lopholatilus chamaeleonticeps	Katz, S. J., Grimes, C. B., & Able, K. W. (1983). Delineation of tilefish, Lopholatilus chamaeleonticeps, stocks along the United States east coast and in the Gulf of Mexico. Fisheries Bulletin, 81(1), 41–50. Retrieved from http://fishbull.noaa.gov/81-1/katz.pdf
Tilefish	Lopholatilus chamaeleonticeps	Kitts, A., Pinto da Silva, P., & Rountree, B. (2007). The evolution of collaborative management in the Northeast USA tilefish fishery. Marine Policy, 31(2), 192–200. http://doi.org/10.1016/j.marpol.2006.07.002
Tilefish	Lopholatilus chamaeleonticeps	Lombardi, L. A. (2012). Life history, population dynamics, and fishery management of the golden tilefish, Lopholatilus chamaeleonticeps, from the southeast Atlantic and Gulf of Mexico. PhD. Dissertaion. University of Florida. Retrieved from http://ufdc.ufl.edu/UFE0044580/00001
Tilefish	Lopholatilus chamaeleonticeps	Lombardi, L., Fitzhugh, G., & Lyon, H. (2010). Golden tilefish (Lopholatilus chamaeleonticeps) age , growth , and reproduction from the northeastern Gulf of Mexico : 1985 , 1997-2009. SEDAR (Vol. 22). Panama City, FL. Retrieved from http://sedarweb.org/docs/wpapers/S22_DW_01.pdf
Tilefish	Lopholatilus chamaeleonticeps	Lombardi-Carlson, L. A., & Andrews, A. H. (2015). Age estimation and lead-radium dating of golden tilefish, Lopholatilus chamaeleonticeps. Environmental Biology of Fishes, 98(7), 1787. http://doi.org/10.1007/s10641-015-0398-0
Tilefish	Lopholatilus chamaeleonticeps	McBride, R. S., Vidal, T. E., & Cadrin, S. X. (2013). Changes in size and age at maturity of the northern stock of Tilefish (Lopholatilus chamaeleonticeps) after a period of overfishing. Fishery Bulletin, 111(2), 161–174. http://doi.org/10.7755/fb.111.2.4
Tilefish	Lopholatilus chamaeleonticeps	NMFS. (n.d.). An Assessment of Golden Tilefish, Lopholatilus chamaeleonticeps, in the Middle Atlantic-Southern New England Region. Northeast Fisheries Science Center. Woods Hole, MA. Retrieved from http://www.nefsc.noaa.gov/publications/crd/crd0915/pdfs/tilefish.pdf
Tilefish	Lopholatilus chamaeleonticeps	Palmer, S. M., Harris, P. J., & Powers, P. T. (2002). Age, growth and reproduction of tilefish, Lopholatilus chamaeleonticeps, along the southeast Atlantic coast of the United States, 1980-89 and 1996-98. SEDAR4-DW-18, 389–404. http://doi.org/10.1006/jfbi.2001.1851
Tilefish	Lopholatilus chamaeleonticeps	Ross, J. L., & Huntsman, G. R. (1982). Age, growth, and mortality of blueline tilefish from North Carolina and South Carolina. Transactions of the American Fisheries Society, 111(5), 585–592. Retrieved from http://www.tandfonline.com/doi/abs/10.1577/1548-8659(1982)111%253C585%253AAGAMOB%253E2.0.CO%253B2
Tilefish	Lopholatilus chamaeleonticeps	Rudershausen, P. J., Williams, E. H., Buckel, J. A., Potts, J. C., & Manooch, C. S. (2008). Comparison of reef fish catch per unit effort and total mortality between the 1970s and 2005-2006 in Onslow Bay, North Carolina. Transactions of the American Fisheries Society, 137(5), 1389–1405. http://doi.org/10.1577/T07-159.1
Tilefish	Lopholatilus chamaeleonticeps	SEDAR. (2004). Age, growth and reproduction of tilefish, Lopholatilus chamaeleonticeps, along the southeast Atlantic coast of the United States, 1980-87 and 1996-98. SEDAR 4-DW-18. Retrieved from http://sedarweb.org/docs/wpapers/SEDAR4_DW_18.pdf
Tilefish	Lopholatilus chamaeleonticeps	SEDAR. (2004). SEDAR 4- Stock Assessment of the Deepwater Snapper / Grouper Complex in the South Atlantic. SEDAR. North Charleston, SC. Retrieved from http://safmc.net/Portals/6/Meetings/Council/BriefingBook/June2007/SSCComm/SEDAR4-FinalSAR.pdf
Tilefish	Lopholatilus chamaeleonticeps	SEDAR. (2011). SEDAR 22 Gulf of Mexico Tilefish Stock Assessment Report. SEDAR. North Charleston, SC. Retrieved from http://sedarweb.org/docs/sar/tilefish_SAR_FINAL.pdf
Tilefish	Lopholatilus chamaeleonticeps	SEDAR. (2011). SEDAR 25 Stock Assessment Report South Atlantic Tilefish. SEDAR. North Charleston, SC. Retrieved from http://sedarweb.org/docs/sar/SEDAR25_TilefishSAR.pdf
Tilefish	Lopholatilus chamaeleonticeps	SEDAR. (2013). SEDAR 32 Stock Assessment Report South Atlantic Blueline Tilefish. SEDAR. North Charleston, SC. Retrieved from http://sedarweb.org/docs/sar/S32_SA-BLT_SAR_FINAL_11.26.2013.pdf
Tilefish	Lopholatilus chamaeleonticeps	Steimle, F. W., Zetlin, C. A., Berrien, P. L., Johnson, D. L., & Chang, S. (1999). Essential fish habitat source document: tilefish, Lopholatilus chamaeleonticeps, life history and habitat characteristics. NOAA Technical Memorandum NMFS-NE-152. Woods Hole, MA. Retrieved from http://books.google.com/books?hl=en&amp;lr=&amp;id=-wK_JCdVkpQC&amp;oi=fnd&amp;pg=PA1&amp;dq=essential+fish+habitat+source+…
Tilefish	Lopholatilus chamaeleonticeps	Turner, S. C., Grimes, C. B., & Able, K. W. (1983). Growth, mortality, and age size structure of the fisheries for tilefish, Lopholatilus chamaelonticeps, in the Middle Atlantic-Southern New-England region. Fishery Bulletin, 81(4), 751–763.
Vermilion Snapper	Rhomboplites aurorubens	Allman, R. J. (2007). Small-scale spatial variation in the population structure of vermilion snapper (Rhomboplites aurorubens) from the northeast Gulf of Mexico. Fisheries Research, 88(1–3), 88. http://doi.org/10.1016/j.fishres.2007.07.017
Vermilion Snapper	Rhomboplites aurorubens	Allman, R. J., Tunnell, J. A., & Barnett, B. K. (2004). Vermilion Snapper Otolith Aging : 2001-2004 Data Summary. Sedar 9 DW2, 20.
Vermilion Snapper	Rhomboplites aurorubens	Arreguín-sánchez, F., Munro, J. L., Balgos, M. C., & Pauly, D. (Eds.). (1996). Biology, Fisheries, and Culture of Tropical Groupers and Snappers. International Center for Living Aquatic Resources Management. Retrieved from http://pubs.iclarm.net/libinfo/Pdf/Pub CP6 48.pdf
Vermilion Snapper	Rhomboplites aurorubens	Barber, R. C. (1989). Age and growth of vermilion snapper (Rhomboplites aurorubens) in the northern Gulf of Mexico. Texas A&M University.
Vermilion Snapper	Rhomboplites aurorubens	Boardman, C., & Weiler, D. (1979). Aspects of the life history of three deepwater snappers around Puerto Rico. Gulf & Caribbean Fisheries Institute. Retrieved from http://aquaticcommons.org/12269/1/gcfi_32-22.pdf
Vermilion Snapper	Rhomboplites aurorubens	Chih, C. (2015). Length and age frequency distributions for vermilion snappers collected in the Gulf of Mexico from 1981 to 2014 SEDAR45-WP-08. North Charleston, SC.
Vermilion Snapper	Rhomboplites aurorubens	Coleman, F. C., Koenig, C. C., Huntsman, G. R., Musick, J. A., Eklund, A. M., McGovern, J. C., … Grimes, C. B. (2000). Long-lived Reef Fishes: The Grouper-Snapper Complex. Fisheries, 25(3), 14–21. http://doi.org/10.1577/1548-8446(2000)025
Vermilion Snapper	Rhomboplites aurorubens	Cuellar, N., Sedberry, G. R., & Wyanski, D. M. (1996). Reproductive seasonality, maturation, fecundity, and spawning frequency of the vermilion snapper, Rhomboplites aurorubens, off the southeastern United States. Fishery Bulletin, 94(4), 635–653. Retrieved from http://mobile.dc.statelibrary.sc.gov/handle/10827/10561
Vermilion Snapper	Rhomboplites aurorubens	Davis, W. T., Drymon, J. M., & Powers, S. P. (2015). Spatial and dietary overlap creates potential for competition between red snapper (Lutjanus campechanus) and Vermilion snapper (Rhomboplites aurorubens). PloS One, 10(12), 1–16. http://doi.org/10.1371/journal.pone.0144051
Vermilion Snapper	Rhomboplites aurorubens	Farmer, N. A., Malinowski, R. P., McGovern, M. F., & Rubec, P. J. (2016). Stock complexes for fisheries management in the Gulf of Mexico. Marine and Coastal Fisheries, 8(1), 177–201. http://doi.org/10.1080/19425120.2015.1024359
Vermilion Snapper	Rhomboplites aurorubens	Fitzhugh, G. R., Lyon, H. M., & Barnett, B. K. (2015). Reproductive Parameters for Gulf of Mexico Vermilion Snapper, Rhomboplites aurorubens, 1991-­2014. SEDAR (Vol. 45). SEDAR. North Charleston, SC. Retrieved from http://sedarweb.org/docs/wpapers/S45_WP_02_GOM VS reproductive parameters.pdf
Vermilion Snapper	Rhomboplites aurorubens	Freitas, M. O., de Moura, R. L., Francini-Filho, R. B., & Minte-Vera, C. V. (2011). Spawning patterns of commercially important reef fish (Lutjanidae and Serranidae) in the tropical western South Atlantic. Scientia Marina, 75(1), 135–146. http://doi.org/10.3989/scimar.2011.75n1135
Vermilion Snapper	Rhomboplites aurorubens	Gledhill, C. T., Lyczkowski-Shultz, J., Rademacher, K., Kargard, E., Crist, G., & Grace, M. a. (1996). Evaluation of video and acoustic index methods for assessing reef-fish populations. ICES Journal of Marine Science, 53(2), 483–485. http://doi.org/10.1006/jmsc.1996.0069
Vermilion Snapper	Rhomboplites aurorubens	Goodyear, C. P., & Schirripa, M. J. (1991). A biological profile for vermilion snapper with a description of the fishery in the Gulf of Mexico. Southeast Fisheries Science Center. Miami, FL. Retrieved from https://www.researchgate.net/publication/264673248_A_biological_profile_for_vermilion_snapper_with_a_description_of_the_fishery_in_the_Gulf_of_Mexico
Vermilion Snapper	Rhomboplites aurorubens	Grimes, C. B. (1978). Age, growth and length-weight relationship of vermilion snapper, Rhomboplites aurorubens from North Carolina and South Carolina waters. Transactions of the American Fisheries Society, 107(3), 454–456. Retrieved from papers2://publication/uuid/5A38F099-E809-44C4-9967-54CFE038B269
Vermilion Snapper	Rhomboplites aurorubens	Grimes, C. B., Iii, C. S. M., Huntsman, G. R., & Dixon, R. L. (1975). Red Snappers of the Carolina Coast. Marine Fisheries Review, 12–15. Retrieved from http://spo.nmfs.noaa.gov/mfr391/mfr3912.pdf
Vermilion Snapper	Rhomboplites aurorubens	Grimes, C. B., Manooch, C. S., & Huntsman, G. R. (1982). Reef and rock outcropping fishes of the outer continental shelf of North Carolina and South Carolina, and ecological notes on the red porgy and vermilion snapper. Bulletin of Marine Science, 32(1), 277–289. Retrieved from http://www.ingentaconnect.com/content/umrsmas/bullmar/1982/00000032/00000001/art00020
Vermilion Snapper	Rhomboplites aurorubens	Grimes, C., & Huntsman, G. (1980). Reproductive biology of the vermillion snapper, Rhomboplites aurorubens, from North Carolina and South Carolina. US Fishery Bulletin, 78, 137–146. Retrieved from http://fishbull.noaa.gov/78-1/grimes.pdf
Vermilion Snapper	Rhomboplites aurorubens	Hood, P. (2006). History of Vermilion Snapper, Greater Amberjack, and Gray Triggerfish Management in Federal Waters of the Us Gulf of Mexico- 1984-2005: SEDAR 9. NOAA Fisheries, St Petersburg, FL. Retrieved from http://sedarweb.org/docs/wpapers/S9DW01_Hist Mgmt.pdf
Vermilion Snapper	Rhomboplites aurorubens	Hood, P. B., & Johnson, A. K. (1999). Age, growth, mortality, and reproduction of vermilion snapper, Rhombopolites aurorubens , from the eastern Gulf of Mexico. Fisheries Bulletin, 97(March), 828–841. Retrieved from http://fishbull.noaa.gov/974/08hoodfi.pdf
Vermilion Snapper	Rhomboplites aurorubens	Johnson, M. W., Powers, S. P., Hightower, C. L., & Kenworthy, M. (2010). Age, Growth, Mortality, and Diet Composition of Vermilion Snapper from the North-Central Gulf of Mexico. Transactions of the American Fisheries Society, 139(4), 1136–1149. http://doi.org/10.1577/T09-179.1
Vermilion Snapper	Rhomboplites aurorubens	Lombardi, L., Allman, R., Thornton, L., & Palmer, C. (2015). Description of age data and estimated growth for vermilion snapper from the northern Gulf of Mexico: 1994-2014. Sedar45-WP-01 North Charleston, SC.
Vermilion Snapper	Rhomboplites aurorubens	Manickchand-Heileman, S. C., & Phillip, D. A. T. (1999). Contribution to the biology of the vermilion snapper, Rhomboplites aurorubens, in Trinidad and Tobago, West Indies. Environmental Biology of Fishes, 55(4), 413–421. http://doi.org/10.1023/A:1007513432102
Vermilion Snapper	Rhomboplites aurorubens	Munro, J. L., Gaut, V. C., Thompson, R., & Reeson, P. H. (1973). The spawning seasons of Caribbean reef fishes. Journal of Fish Biology, 5(1), 69. http://doi.org/10.1111/j.1095-8649.1973.tb04431.x
Vermilion Snapper	Rhomboplites aurorubens	Myers, R. A., Bowen, K. G., & Barrowman, N. J. (1999). Maximum reproductive rate of fish at low population sizes. Canadian Journal of Fisheries and Aquatic Sciences, 56, 2404–2419.
Vermilion Snapper	Rhomboplites aurorubens	Nelson, R. S. (1988). A study of the life history, ecology, and population dynamics of four sympatric reef predators (Rhomboplites aurorubens, Lutjanus campechanus, Lutjanidae ; Haemulon melanurum, Haemulidae ; and Pagrus pagrus, Sparidae on the Eas. Ph. D. North Carolina State University. Retrieved from https://books.google.com/books?id=Y5-UtgAACAAJ&dq=inauthor:%22Russell+Steven+Nelson%22&hl=en&…
Vermilion Snapper	Rhomboplites aurorubens	Noaa. (2005). Stock Assessment and Fishery Evaluation Report for the Snapper Grouper Fishery of the South Atlantic November 18, 2005. South Atlantic Fishery Management Council. Retrieved from http://sero.nmfs.noaa.gov/sustainable_fisheries/safe_reports/documents/pdfs/snapper_grouper_2005_safe.pdf
Vermilion Snapper	Rhomboplites aurorubens	Parker Jr, R. O. (1990). Tagging studies and diver observations of fish populations on live-bottom reefs of the US southeastern coast. Bulletin of Marine Science, 46(3), 749–760. Retrieved from http://www.ingentaconnect.com/content/umrsmas/bullmar/1990/00000046/00000003/art00013
Vermilion Snapper	Rhomboplites aurorubens	Patrick, W., Spencer, P., Ormseth, O., Cope, J., Field, J., Kobayashi, D., … Lawson, P. (2009). Use of productivity and susceptibility indices to determine the vulnerability of a stock: with example applications to six US fisheries. NOAA Tech. Memo. http://doi.org/NMFS-F/SPO-101
Vermilion Snapper	Rhomboplites aurorubens	Porch, C., & Cass-Calay, S. L. (2001). SEDAR 13 Status of the Vermilion Snapper Fishery in the Gulf of Mexico. Retrieved from http://sedarweb.org/docs/wsupp/S9RD13_GOMVS2001.pdf
Vermilion Snapper	Rhomboplites aurorubens	Potts, J. C., Manooch, C. S., & Vaughan, D. S. (1998). Age and Growth of Vermilion Snapper from the Southeastern United States. Transactions of the American Fisheries Society, 127(5), 787–795. http://doi.org/10.1577/1548-8659(1998)127
Vermilion Snapper	Rhomboplites aurorubens	Rudershausen, P. J., Williams, E. H., Buckel, J. A., Potts, J. C., & Manooch, C. S. (2008). Comparison of reef fish catch per unit effort and total mortality between the 1970s and 2005-2006 in Onslow Bay, North Carolina. Transactions of the American Fisheries Society, 137(5), 1389–1405. http://doi.org/10.1577/T07-159.1
Vermilion Snapper	Rhomboplites aurorubens	Schirripa, M. J. (1992). Analysis of the age and growth of Vermillion Snapper with an assessment of the fishery in the Gulf of Mexico. Miami, FL.
Vermilion Snapper	Rhomboplites aurorubens	Schwartz, F. J. (2007). Snapper Fishes (Family Lutjanidae) of North Carolina. Journal of the North Carolina Academy of Science, 123(1), 14–21. Retrieved from http://dc.lib.unc.edu/cgi-bin/showfile.exe?CISOROOT=/jncas&CISOPTR=3855
Vermilion Snapper	Rhomboplites aurorubens	SEDAR. (2003). SEDAR-Complete Assessment and Review Report of South Atlantic Vermillion Snapper. SEDAR. North Charleston, SC. Retrieved from http://sedarweb.org/docs/sar/SEDAR2_SAR2_VScomplete2.pdf
Vermilion Snapper	Rhomboplites aurorubens	SEDAR. (2006). SEDAR 9 Gulf of Mexico Vermilion Snapper Stock Assessment Report. SEDAR. North Charleston, SC. Retrieved from http://sedarweb.org/docs/sar/SEDAR9_SAR3 GOM VermSnap.pdf
Vermilion Snapper	Rhomboplites aurorubens	SEDAR. (2007). 2007 Update of the SEDAR 2 Assessment of South Atlantic Vermilion Snapper. SEDAR. North Charleston, SC. Retrieved from http://sedarweb.org/docs/suar/2007_SA_VermilionUpdate.pdf
Vermilion Snapper	Rhomboplites aurorubens	SEDAR. (2008). SEDAR 17 Stock Assessment Report South Atlantic Vermilion Snapper. SEDAR. North Charleston, SC. Retrieved from http://sedarweb.org/docs/sar/S17SAR2 Vermilion Snapper Final.pdf
Vermilion Snapper	Rhomboplites aurorubens	SEDAR. (2016). SEDAR 45 – stock assessment report: Gulf of Mexico vermilion snapper. SEDAR Stock Assessment Report. North Charleston, SC.
Vermilion Snapper	Rhomboplites aurorubens	Sedberry, G. R., Cooksey, C. L., Crowe, S. F., Hyland, J., Jutte, P. C., Ralph, C. M., & Sautter, L. R. (2004). Characterization of deep reef habitat off the Southeastern U.S., with particular emphasis on discovery, exploration and description of reef fish spawning sites. Charleston, SC: Marine Resources Institute. Retrieved from http://www.nbi.noaa.gov/products/others/OE 02 Shelf Edge Spawning F…
Vermilion Snapper	Rhomboplites aurorubens	Zastrow, C. E. (1984). Age and growth of the red snapper, Lutjanus campechanus, and the vermilion snapper, Rhomboplites aurorubens, from the northwestern Gulf of Mexico. M.S. Thesis. Texas A&M University. Retrieved from http://oaktrust.library.tamu.edu/handle/1969.1/ETD-TAMU-1984-THESIS-Z38
Vermilion Snapper	Rhomboplites aurorubens	Zhao, B., & McGovern, J. C. (1997). Temporal variation in sexual maturity and gear-specific sex ratio of the vermilion snapper Rhomboplites aurorubens, in the South Atlantic Bight. Fishery Bulletin, 95, 837–848. Retrieved from http://dc.statelibrary.sc.gov/handle/10827/10571
Vermilion Snapper	Rhomboplites aurorubens	Zhao, B., McGovern, J. C., & Harris, P. J. (1997). Age, Growth, and Temporal Change in Size at Age of the Vermilion Snapper from the South Atlantic Bight. Transactions of the American Fisheries Society, 126(2), 181–193. http://doi.org/10.1577/1548-8659(1997)126
Warsaw Grouper	Hyporthodus nigritus	Farmer, N. A., & Karnauskas, M. (2013). Spatial distribution and conservation of speckled hind and warsaw grouper in the Atlantic Ocean off the southeastern U.S. PLoS ONE, 8(11). http://doi.org/10.1371/journal.pone.0078682
Warsaw Grouper	Hyporthodus nigritus	Farmer, N. A., Malinowski, R. P., McGovern, M. F., & Rubec, P. J. (2016). Stock complexes for fisheries management in the Gulf of Mexico. Marine and Coastal Fisheries, 8(1), 177–201. http://doi.org/10.1080/19425120.2015.1024359
Warsaw Grouper	Hyporthodus nigritus	Goode, G. B., & Bean, T. H. (1878). A note upon the black grouper (Epinephelus nigritus) (Holbrook, Gill) of the southern coast. Proceedings of the United States National Museum (Vol. 1). http://doi.org/10.5479/si.00963801.1-26.182
Warsaw Grouper	Hyporthodus nigritus	Manooch, III, C. H., & Mason, D. L. (1987). Age and growth of the warsar grouper and black grouper from the southesast region of the united states. Northeast Gulf Science, 9(2), 65–75.
Warsaw Grouper	Hyporthodus nigritus	NOAA. (2012). Distribution of speckled hind and warsaw grouper in the U.S. South Atlantic. SERO-LAPP. St. Petersburg, FL. Retrieved from http://sero.nmfs.noaa.gov/sustainable_fisheries/lapp_dm/archives/documents/pdfs/2012/sero_lapp_2012_08_reg17_speckled_hind__and_warsaw_grouper_in_safmc.pdf
Warsaw Grouper	Hyporthodus nigritus	Rudershausen, P. J., Williams, E. H., Buckel, J. A., Potts, J. C., & Manooch, C. S. (2008). Comparison of reef fish catch per unit effort and total mortality between the 1970s and 2005-2006 in Onslow Bay, North Carolina. Transactions of the American Fisheries Society, 137(5), 1389–1405. http://doi.org/10.1577/T07-159.1
Warsaw Grouper	Hyporthodus nigritus	Sedberry, G. R., Pashuk, O., Pashuk, O., Wyanski, D. M., Wyanski, D. M., Wyanski, D. M., … Stephen, J. A. (2006). Spawning locations for Atlantic reef fishes off the Southeastern U.S. Proc. of the 57th Gulf and Caribbean Fisheries Institute, 463–514. Retrieved from http://graysreef.noaa.gov/science/publications/pdfs/i-49.pdf
Yellowedge grouper	Hyporthodus flavolimbatus	Bullock, L. H., Godcharles, M. F., & Crabtree, R. E. (1996). Reproduction of Yellowedge Grouper, Epinephelus Flavolimbatus, from the Eastern Gulf of Mexico, 59(1), 216–224. Retrieved from http://www.ingentaconnect.com/content/umrsmas/bullmar/1996/00000059/00000001/art00015
Yellowedge grouper	Hyporthodus flavolimbatus	Cody, T., Fuls, B. E., C, M. G., & Bryan, C. E. (1981). Assessment of bottom longline fishing off the central Texas coast, a completion report. Austin, TX: Texas Parks and Wildlife Department, Coastal Fisheries.
Yellowedge grouper	Hyporthodus flavolimbatus	Coleman, F. C., & Koenig, C. C. (2010). The effects of fishing, climate change, and other anthropogenic disturbances on red grouper and other reef fishes in the Gulf of Mexico. Integrative and Comparative Biology, 50(2), 201–212. http://doi.org/10.1093/icb/icq072
Yellowedge grouper	Hyporthodus flavolimbatus	Coleman, F. C., & Williams, S. L. (2002). Overexploiting marine ecosystem engineers: potential consequences for biodiversity. Trends in Ecology and Evolution, 17(1), 40–44.
Yellowedge grouper	Hyporthodus flavolimbatus	Comyns, B., Henwood, T., Daniels, K., & Cook, M. (2006). Yellowedge Grouper Age , Growth and Reproduction. Final Report CR120 Southeast Regional Office. Retrieved from http://www.sefsc.noaa.gov/P_QryLDS/download/CR120_final report NA03NMF4540415.pdf?id=LDS
Yellowedge grouper	Hyporthodus flavolimbatus	Cook, M. (2007). Population dynamics, structure, and per-recruit analyses of yellowedge grouper, Epinephelus flavolimbatus, from the northern Gulf of Mexico. Doctoral Dissertation. University of Southern Mississippi. Retrieved from http://sedarweb.org/docs/wsupp/S22_RD05_MCook_Dissertation.pdf
Yellowedge grouper	Hyporthodus flavolimbatus	Cook, M., & Hendon, M. (2010). Yellowedge grouper (Epinephelus flavolimbatus) age, growth and reproduction from the northern Gulf of Mexico. SEDAR 22. Panama City, FL. Retrieved from http://sedarweb.org/docs/wpapers/S22_DW_08.pdf
Yellowedge grouper	Hyporthodus flavolimbatus	Cook, M., & Lombardi, L. (2007). Yellowedge grouper (Epinephelus flavolimbatus) and golden tilefish (Lopholatilus chamaeleonticeps) distributions, habitat preferences and available biological samples. NOAA Fisheries, Southeast Fisheries Science Center, Panama City, FL. Retrieved from http://sedarweb.org/docs/wsupp/S22_RD03_distribution_habitat.pdf
Yellowedge grouper	Hyporthodus flavolimbatus	Cook, M., Fitzhugh, G. R., & Franks, J. S. (2009). Validation of yellowedge grouper, Epinephelus flavolimbatus, age using nuclear bomb-produced radiocarbon. Environmental Biology of Fishes, 86(4), 461–472. http://doi.org/10.1007/s10641-009-9536-x
Yellowedge grouper	Hyporthodus flavolimbatus	Farmer, N. A., Malinowski, R. P., McGovern, M. F., & Rubec, P. J. (2016). Stock complexes for fisheries management in the Gulf of Mexico. Marine and Coastal Fisheries, 8(1), 177–201. http://doi.org/10.1080/19425120.2015.1024359
Yellowedge grouper	Hyporthodus flavolimbatus	Jones, R. S., Gutherz, E. J., Nelson, W. R., & Matlock, G. C. (1989). Burrow utilization by yellowedge grouper, Epinephelus flavolimbatus, in the northwestern Gulf of Mexico. Environmental Biology of Fishes, 26(4), 277–284. http://doi.org/10.1007/BF00002464
Yellowedge grouper	Hyporthodus flavolimbatus	Pollack, A. G., & Ingram, G. W. (2010). Abundance Indices of Subadult Yellowedge Grouper, Epinephelus flavolimbatus, Collected in Summer and Fall Groundfish Surveys in the northern Gulf of Mexico. SEDAR 22-DW-06. Southeas Fisheries Science Center. Pascagoula, MS. Retrieved from http://sedarweb.org/docs/wpapers/S22_DW_06_v2.pdf
Yellowedge grouper	Hyporthodus flavolimbatus	SEDAR. (2011). SEDAR 22 Gulf of Mexico Yellowedge Grouper. SEDAR. North Charleston, SC. Retrieved from http://sedarweb.org/docs/sar/YEG_final_SAR.pdf
Yellowfin Grouper	Mycteroperca venenosa	Appeldoorn, R. S., Dennis, G. D., & Monterrosa Lopez, O. (1987). Review of shared demersal resources of Puerto Rico and the lesser Antilles region. Maqyasguez, Puerto Rico. Retrieved from http://www.fao.org/docrep/014/am421e/am421e.pdf
Yellowfin Grouper	Mycteroperca venenosa	Bell, M. C., & Velzian, R. (2007). SEDAR 14 Stock Assessment Review: Caribbean Yellowfin Grouper, Mutton Snapper, and Queen Conch. North Charleston, NC. Retrieved from http://sedarweb.org/docs/sar/S14SAR1 Yellowfin Report.pdf
Yellowfin Grouper	Mycteroperca venenosa	Claro, R., & Lindeman, K. C. (2003). Spawning aggregation sites of snapper and grouper species (Lutjanidae and Serranidae) on the insular shelf of Cuba. Gulf and Caribbean Research, 14(2), 91–106. http://doi.org/10.18785/gcr.1402.07
Yellowfin Grouper	Mycteroperca venenosa	Cushion, N., Cook, M., & Schull, J. (2008). Reproductive classification and spawning seasonality of Epinephelus striatus (Nassau grouper), E . guttatus (red hind) and Mycteroperca venenosa (yellowfin grouper) from the Bahamas. Proceedings of the 11th International Coral Reef Symposium, Ft. Lauderdale, Florida, (November 2015), 994–998. Retrieved from //www.researchgate.net/publication/266488711_R…
Yellowfin Grouper	Mycteroperca venenosa	Farmer, N. A., Malinowski, R. P., McGovern, M. F., & Rubec, P. J. (2016). Stock complexes for fisheries management in the Gulf of Mexico. Marine and Coastal Fisheries, 8(1), 177–201. http://doi.org/10.1080/19425120.2015.1024359
Yellowfin Grouper	Mycteroperca venenosa	Munro, J. L., & Mc. B Williams, D. (1985). Assessment and management of coral reef fisheries: biological, environmental and socio-economic aspects. Proceedings of the 5th International Coral Reef Congress, (4), 545–581.
Yellowfin Grouper	Mycteroperca venenosa	Munro, J. L., Gaut, V. C., Thompson, R., & Reeson, P. H. (1973). The spawning seasons of Caribbean reef fishes. Journal of Fish Biology, 5(1), 69. http://doi.org/10.1111/j.1095-8649.1973.tb04431.x
Yellowfin Grouper	Mycteroperca venenosa	Nemeth, R. S., Kadison, E., & Herzlieb, S. (2006). Status of a Yellowfin (Mycteroperca venenosa) grouper spawning aggregation in the US Virgin Islands with notes on other species. Proceedings of the Gulf and Caribbean Fisheries Institute, 57, 543–558. Retrieved from http://aquaticcommons.org/13892/1/gcfi_57-38.pdf
Yellowfin Grouper	Mycteroperca venenosa	Noaa. (2005). Stock Assessment and Fishery Evaluation Report for the Snapper Grouper Fishery of the South Atlantic November 18, 2005. South Atlantic Fishery Management Council. Retrieved from http://sero.nmfs.noaa.gov/sustainable_fisheries/safe_reports/documents/pdfs/snapper_grouper_2005_safe.pdf
Yellowfin Grouper	Mycteroperca venenosa	Sala, E., Ballesteros, E., & Starr, R. (2001). Rapid Decline of Nassau Grouper Spawning Aggregations in Belize : Fishery Management and Conservation Needs Rapid Decline of Nassau Grouper Spawning Aggregations in Belize : Fishery Management and Conservation Needs. Fisheries, 26(10), 23–30. http://doi.org/10.1577/1548-8446(2001)026<0023
Yellowfin Grouper	Mycteroperca venenosa	Schärer, M. T., Nemeth, M. I., Mann, D., Locascio, J., Appeldoorn, R. S., & Rowell, T. J. (2012). Sound Production and Reproductive Behavior of Yellowfin Grouper, Mycteroperca venenosa (Serranidae) at a Spawning Aggregation. Copeia, (1), 135–144. http://doi.org/10.1643/ce-10-151
Yellowfin Grouper	Mycteroperca venenosa	SEDAR. (2006). Stock Assessment Report 1, Caribbean Yellowfin Grouper. SEDAR 14. North Charleston, SC.
Yellowfin Grouper	Mycteroperca venenosa	Sluka, R., Chiappone, M., Sullivan, K. M., Potts, T. A., Levy, J. M., Schmitt, E. F., & Meester, G. (1998). Density, species and size distribution of groupers (Serranidae) in three habitats at Elbow Reef, Florida Keys. Bulletin of Marine Science, 62(1), 219–228. Retrieved from http://www.ingentaconnect.com/content/umrsmas/bullmar/1998/00000062/00000001/art00020
Yellowfin Grouper	Mycteroperca venenosa	Taylor, R. G., & McMichael Jr, R. H. (1983). The wire fish-trap fisheries in Monroe and Collier counties, Florida. St. Petersburg, FL: Florida Department of Natural Resources.
Yellowfin Grouper	Mycteroperca venenosa	Thompson, R., & Mumot, J. L. (1978). Aspects of the biology and ecology of Caribbean reef fishes : Serranidae (hinds and groupers). Journal of Fish Biology, 12, 115–146. http://doi.org/10.1111/j.1095-8649.1978.tb04158.x
Yellowfin Grouper	Mycteroperca venenosa	Tuz-Sulub, A., Brule, T., Cervera-Cervera, K., & Espinoza-Mendez, J. C. (2006). Evidence for sexual dichromatisms in spawning aggregations of yellowfin grouper Mycteroperca venenosa and tiger grouper Mycteroperca tigris from the southern Gulf of Mexico. Journal of Fish Biology, 69(6), 1744. http://doi.org/10.1111/j.1095-8649.2006.01241.x
Yellowfin Grouper	Mycteroperca venenosa	Tuz-Sulub, A., Cervera-Cervera, K., Colas-Marrufo, T., & Brulé, T. (2003). First evidence on the formation of spawning aggregations of groupers (Epinephelinae; Epinephelini) from the Campeche Bank, Mexico. Proceedings of the Gulf and Caribbean Fisheries …, 54, 652–667. Retrieved from http://aquaticcommons.org/13595/1/gcfi_54-54.pdf
Yellowfin Grouper	Mycteroperca venenosa	Tuz-Sulub, A., Cervera-Cervera, K., Espinoza-Mendez, J. C., & Brulé, T. (2004). Preliminary characterization of the space distribution of several species of groupers (Epinephelinae: Epinephelini) in a spawning site in the Campeche Bank, Yucatan, Mexico. Proceedings of the Gulf and Caribbean Fisheries …, 55, 577–591. Retrieved from http://aquaticcommons.org/13668/6/gcfi_55-48.pdf
Yellowmouth Grouper	Mycteroperca interstitialis	Bullock, L. H., & Murphy, M. D. (1994). Aspects of the life history of the yellowmouth grouper, Mycteroperca interstitialis, in the eastern Gulf of Mexico. Bulletin of Marine Science, 55(1), 30–45. Retrieved from http://www.ingentaconnect.com/content/umrsmas/bullmar/1994/00000055/00000001/art00003
Yellowmouth Grouper	Mycteroperca interstitialis	Burton, M. L., Potts, J. C., & Carr, D. R. (2014). Age, Growth, and Mortality of Yellowmouth Grouper from the Southeastern United States. Marine and Coastal Fisheries, 6(1), 33–42. http://doi.org/10.1080/19425120.2013.866998
Yellowmouth Grouper	Mycteroperca interstitialis	Farmer, N. A., Malinowski, R. P., McGovern, M. F., & Rubec, P. J. (2016). Stock complexes for fisheries management in the Gulf of Mexico. Marine and Coastal Fisheries, 8(1), 177–201. http://doi.org/10.1080/19425120.2015.1024359
Yellowmouth Grouper	Mycteroperca interstitialis	Manickchand-Heileman, S. C., & Phillip, D. A. T. (2000). Age and growth of the yellowedge grouper, Epinephelus flavolimbatus, and the yellowmouth grouper, Mycteroperca interstitialis, off Trinidad and Tobago. Fishery Bulletin, 98(2), 290–298.
Yellowmouth Grouper	Mycteroperca interstitialis	Noaa. (2005). Stock Assessment and Fishery Evaluation Report for the Snapper Grouper Fishery of the South Atlantic November 18, 2005. South Atlantic Fishery Management Council. Retrieved from http://sero.nmfs.noaa.gov/sustainable_fisheries/safe_reports/documents/pdfs/snapper_grouper_2005_safe.pdf
Yellowmouth Grouper	Mycteroperca interstitialis	Sedar. (2016). Sedar 49 Gulf of Mexico Data-limited Species : red drum, lane snapper, wenchman, yellowmouth grouper, speckled hind, snowy grouper, almaco jack, lesser amberjack. North Charleston, SC.
