# Supplementary material for: The importance of spawning behavior in understanding the vulnerability of exploited marine fishes in the U.S. Gulf of Mexico
Source: PeerJ. 2021 Jul 27;9:e11814. doi: 10.7717/peerj.11814 (PMC8323598; doi:10.7717/peerj.11814)
Supplement: Supplemental Information 4 [file peerj-09-11814-s004.xlsx]

## Sheet: Citation
Suggested Citation
Biggs, C., Bolser, D., B. Erisman, W. Heyman, S.Kobara, N. Farmer, S. Lowerre-Barbieri, M. Karnauskas, and J. Brenner. (2017). Cooperative monitoring program for spawning aggregations in the Gulf of Mexico: Management Parameters. Version 2018.3. Available at Available at http://geo.gcoos.org/restore/

## Sheet: Metadata
Column Header	Description
FMP Category	Category as defined by the Fishery Management Plan (FMP) of the Gulf of Mexico Fishery Management Council
Common Name	Official common name according to the American Fisheries Society
Scientific Name	Official scientific name based on most current taxonomic literature.
Federal Catch and Effort Limits (1-4)	High level of catch limits (1) scaling to no catch limits (4). Total regulations are the sum of the average number of recreational and average number of commercial regulations per state, which include; minimum size, maximum size and daily/bag limit or quota. Scores for each species are as follows: 1 = 5 or more regulations or a complete fishery closure; 2 = 4 regulations; 3 = 2-3 regulations; 4 =…
Federal Gear Measures (1-4)	High level of gear restrictions (1) scaling to no limits on gear use (4). Scores for each species as follows: 1 = 0 to 2 allowable gear types or a complete fishery closure; 2 = 3 to 5 allowable gear types; 3 = 6 to 8 allowable gear types; 4 = 9 or more allowable gear types.
Federal Seasonal Restrictions (1-4)	High level of spawning season prohibition of take or trade (1) scaling to no restrictions (4). The value is the least restrictive score of recreational and commercial seasonal restrictions. Scores for each species, listed separately for commercial and recreational fisheries, as follows: 1 = closed during entire spawning season or complete fishery closure; 2 = seasonal closure during the peak spaw…
Federal Site Closures (1-4)	High compliance spatial closure of spawning site (1) scaling to no spatial closures (4). Scores for each species as follows: 1 = site closed all year or complete fishery closure; 2 = more than or equal to 10% of known spawning sites protected by complete or seasonal site closures; 3 = less than 10% of known spawning sites protected by complete or seasonal site closures; 4 = no spawning site closu…
State Catch and Effort Limits (1-4)	Same scoring system as federal but using the average number of regulations across the 5 Gulf states.
State Gear Measures (1-4)	Same scoring system as federal but using the average number of allowable gears across the 5 Gulf states.
State Seasonal Restrictions (1-4)	Same scoring system as federal except for criteria used for a score of 2; 2 = partial seasonal closure; only part of the spawning season is closed in some or all of the Gulf states.
State Site Closures (1-4)	State site closures are few in number and spatially minimal. Therefore, all species received a score of 4 (no regulations).
Overall Protection (1-4)	Overall protection of spawning as measured by the mean score across all management measures: Scores for each species as follows: 1 = full protection; 2 = moderate protection; 3 = low protection; 4 = no regulations in place to protect spawning.
Intrinsic Vulnerability	Weighted score of spawning behavior and life history characteristics rescaled, 0-1
Extrinsic Vulnerability	Weighted score of fishing and management parameters rescaled, 0-1
Overall Vulnerability	Combined score of intrinsic and extrinsic vulnerability, measured as Euclidean distance in bi-variate space

## Sheet: Management_Extrinsic Indicators
FMP Category	Common Name	Scientific Name	Federal Catch and Effort Limits (1-4)	Federal Gear Measures (1-4)	Federal Seasonal Restrictions (1-4)	Federal Site Closures (1-4)	State Catch and Effort Limits (1-4)	State Gear Measures (1-4)	State Seasonal Restrictions (1-4)	State Site Closures (1-4)	Overall Protection (1-4)	Intrinsic Vulnerability	Extrinsic Vulnerability	Overall Vulnerability
Reef Fish	Almaco Jack	Seriola rivoliana	4	4	4	3	4	3	4	4	3.75	0.431773	0.857201	0.959802
Not Federally Managed	Black Drum	Pogonias cromis	4	4	4	4	3	3	4	4	3.75	0.567592	1	1.14985
Reef Fish	Black Grouper	Mycteroperca bonaci	2	3	4	3	3	3	2	4	3	0.736996	0.649114	0.982095
Reef Fish	Cubera Snapper	Lutjanus cyanopterus	3	3	4	3	3	3	4	4	3.375	0.845469	0.747712	1.12867
Reef Fish	Gag	Mycteroperca microlepis	2	3	4	3	2	3	2	4	2.875	0.654002	0.649114	0.921448
Reef Fish	Atlantic Goliath Grouper	Epinephelus itajara	1	1	1	1	1	1	1	4	1.375	0.739972	0.299965	0.79846
Reef Fish	Gray Triggerfish	Balistes capriscus	1	4	2	3	2	3	2	4	2.625	0.432395	0.442417	0.618626
Reef Fish	Greater Amberjack	Seriola dumerili	1	4	3	3	3	3	2	4	2.875	0.513374	0.542405	0.746831
Reef Fish	Hogfish	Lachnolaimus maximus	3	4	4	3	3	3	4	4	3.5	0.148725	0.785598	0.799552
Coastal Migratory Pelagics	King Mackerel	Scomberomorus cavalla	1	2	4	3	2	3	4	4	2.875	0.156382	0.585564	0.606086
Reef Fish	Mutton Snapper	Lutjanus analis	3	3	4	3	3	3	4	4	3.375	0.808209	0.747712	1.10103
Reef Fish	Nassau Grouper	Epinephelus striatus	1	1	1	1	1	1	1	4	1.375	1	0	1
Red Drum	Red Drum	Sciaenops ocellatus	1	1	1	1	1	2	4	4	1.875	0.612895	0	0.612895
Reef Fish	Red Grouper	Epinephelus morio	2	3	4	3	3	3	2	4	3	0.0885266	0.649114	0.655123
Reef Fish	Red Snapper	Lutjanus campechanus	2	3	4	3	2	3	4	4	3.125	0.276168	0.649114	0.70542
Reef Fish	Scamp	Mycteroperca phenax	2	3	4	3	3	3	4	4	3.25	0.421007	0.649114	0.77369
Not Federally Managed	Sheepshead	Archosargus probatocephalus	4	4	4	4	3	3	4	4	3.75	0.784514	1	1.27101
Not Federally Managed	Southern Flounder	Paralichthys lethostigma	4	4	4	4	3	3	4	4	3.75	0.678213	1	1.20829
Coastal Migratory Pelagics	Spanish Mackerel	Scomberomorus maculatus	2	2	4	3	3	3	4	4	3.125	0	0.657166	0.657166
Not Federally Managed	Spotted Seatrout	Cynoscion nebulosus	4	4	4	4	1	2	4	4	3.375	0.206147	1	1.02103
Reef Fish	Tilefish	Lopholatilus chamaeleonticeps	4	4	4	3	4	3	4	4	3.75	0.0490205	0.830205	0.831651
Reef Fish	Vermilion Snapper	Rhomboplites aurorubens	3	3	4	3	3	3	4	4	3.375	0.143225	0.747712	0.761306
Reef Fish	Warsaw Grouper	Hyporthodus nigritus	3	3	4	3	4	3	4	4	3.5	0.606487	0.720716	0.941944
Reef Fish	Yellowedge Grouper	Hyporthodus flavolimbatus	3	3	4	3	4	3	4	4	3.5	0.612181	0.720716	0.94562
Reef Fish	Yellowfin Grouper	Mycteroperca venenosa	2	3	4	3	3	3	2	4	3	0.536747	0.649114	0.842286
Reef Fish	Yellowmouth Grouper	Mycteroperca interstitialis	3	3	4	3	4	3	4	4	3.5	0.43988	0.720716	0.844349
